# Supplementary material for: Identification of cortical interneuron cell markers in mouse embryos based on machine learning analysis of single-cell transcriptomics
Source: Front Neurosci. 2022 Jul 15;16:841145. doi: 10.3389/fnins.2022.841145 (PMC9337837; doi:10.3389/fnins.2022.841145)
Supplement: Supplementary Table 1 — Feature list generated by mRMR method. [file Table_1.XLSX]

## Sheet: Sheet1
Rank	Feature
1	ENSMUSG00000022048|DPYSL2
2	ENSMUSG00000028201|LHX8
3	ENSMUSG00000041841|RPL37
4	ENSMUSG00000001175|CALM1
5	ENSMUSG00000021028|MBIP
6	ENSMUSG00000042834|D0H4S114
7	ENSMUSG00000045763|BASP1
8	ENSMUSG00000093077|AC113316.1
9	ENSMUSG00000066551|HMGB1
10	ENSMUSG00000037742|EEF1A1
11	ENSMUSG00000001496|NKX2-1
12	ENSMUSG00000027210|MEIS2
13	ENSMUSG00000054766|SET
14	ENSMUSG00000006333|RPS9
15	ENSMUSG00000069171|NR2F1
16	ENSMUSG00000042772|SMG7
17	ENSMUSG00000063659|ZFP238
18	ENSMUSG00000034892|RPS29
19	ENSMUSG00000040459|ARGLU1
20	ENSMUSG00000028788|PTP4A2
21	ENSMUSG00000004885|CRABP2
22	ENSMUSG00000030551|NR2F2
23	ENSMUSG00000029580|ACTB
24	ENSMUSG00000060938|RPL26
25	ENSMUSG00000058672|TUBB2A
26	ENSMUSG00000069196|GM3511
27	ENSMUSG00000070923|KLHL9
28	ENSMUSG00000071658|GNG3
29	ENSMUSG00000025362|RPS26
30	ENSMUSG00000032368|ZIC1
31	ENSMUSG00000071072|PTGES3
32	ENSMUSG00000029245|EPHA5
33	ENSMUSG00000029563|FOXP2
34	ENSMUSG00000013236|PTPRS
35	ENSMUSG00000028832|STMN1
36	ENSMUSG00000005583|MEF2C
37	ENSMUSG00000057841|RPL32
38	ENSMUSG00000021379|ID4
39	ENSMUSG00000071415|RPL23
40	ENSMUSG00000065037|7SK
41	ENSMUSG00000039081|ZFP503
42	ENSMUSG00000028081|RPS3A
43	ENSMUSG00000060424|2610017I09RIK
44	ENSMUSG00000043716|RPL7
45	ENSMUSG00000020358|HNRNPAB
46	ENSMUSG00000021087|RTN1
47	ENSMUSG00000049517|RPS23
48	ENSMUSG00000053038|GM6180
49	ENSMUSG00000022812|GSK3B
50	ENSMUSG00000016559|H3F3B
51	ENSMUSG00000045658|PID1
52	ENSMUSG00000052981|UBE2QL1
53	ENSMUSG00000064339|MT-RNR2
54	ENSMUSG00000060143|GM10076
55	ENSMUSG00000055421|PCDH9
56	ENSMUSG00000026610|ESRRG
57	ENSMUSG00000034336|INA
58	ENSMUSG00000027805|PFN2
59	ENSMUSG00000022285|YWHAZ
60	ENSMUSG00000022108|ITM2B
61	ENSMUSG00000024608|RPS14
62	ENSMUSG00000026238|PTMA
63	ENSMUSG00000062382|GM10116
64	ENSMUSG00000009927|RPS25
65	ENSMUSG00000048402|GLI2
66	ENSMUSG00000046341|GM11223
67	ENSMUSG00000063556|GM10132
68	ENSMUSG00000058013|SEPT11
69	ENSMUSG00000031284|PAK3
70	ENSMUSG00000037852|CPE
71	ENSMUSG00000056201|CFL1
72	ENSMUSG00000072324|GM8420
73	ENSMUSG00000060036|RPL3
74	ENSMUSG00000052310|SLC39A1
75	ENSMUSG00000041708|MPPED1
76	ENSMUSG00000041773|ENC1
77	ENSMUSG00000028234|RPS20
78	ENSMUSG00000029223|UCHL1
79	ENSMUSG00000025794|RPL14
80	ENSMUSG00000042607|ASB4
81	ENSMUSG00000078453|3110003A17RIK
82	ENSMUSG00000020962|GTF2A1
83	ENSMUSG00000026276|SEPT2
84	ENSMUSG00000061983|RPS12
85	ENSMUSG00000026890|LHX6
86	ENSMUSG00000033948|ZSWIM5
87	ENSMUSG00000061787|RPS17
88	ENSMUSG00000037373|CTBP1
89	ENSMUSG00000042596|TCFAP2D
90	ENSMUSG00000059634|GM11942
91	ENSMUSG00000041815|POLDIP3
92	ENSMUSG00000022490|PPP1R1A
93	ENSMUSG00000036438|CALM2
94	ENSMUSG00000061482|HIST1H4D
95	ENSMUSG00000027832|PTX3
96	ENSMUSG00000045128|RPL18A
97	ENSMUSG00000022228|ZFP187
98	ENSMUSG00000067288|RPS28
99	ENSMUSG00000041571|SEPW1
100	ENSMUSG00000058558|RPL5
101	ENSMUSG00000021701|PLK2
102	ENSMUSG00000004880|LBR
103	ENSMUSG00000083910|GM13604
104	ENSMUSG00000086328|2700033N17RIK
105	ENSMUSG00000008682|RPL10
106	ENSMUSG00000027852|NRAS
107	ENSMUSG00000008668|RPS18
108	ENSMUSG00000092341|MALAT1
109	ENSMUSG00000026074|MAP4K4
110	ENSMUSG00000039910|CITED2
111	ENSMUSG00000079523|TMSB10
112	ENSMUSG00000032518|RPSA
113	ENSMUSG00000051022|HS3ST1
114	ENSMUSG00000047139|CD24A
115	ENSMUSG00000022982|SOD1
116	ENSMUSG00000081306|GM15266
117	ENSMUSG00000090733|RPS27
118	ENSMUSG00000026797|STXBP1
119	ENSMUSG00000059751|GM9000
120	ENSMUSG00000025290|RPS24
121	ENSMUSG00000031840|RAB3A
122	ENSMUSG00000070576|MN1
123	ENSMUSG00000046330|RPL37A
124	ENSMUSG00000008658|RBFOX1
125	ENSMUSG00000015165|HNRNPL
126	ENSMUSG00000074794|ARRDC3
127	ENSMUSG00000032178|ILF3
128	ENSMUSG00000029614|RPL6
129	ENSMUSG00000064351|MT-CO1
130	ENSMUSG00000043456|ZFP536
131	ENSMUSG00000047215|RPL9
132	ENSMUSG00000024642|TLE4
133	ENSMUSG00000036894|RAP2B
134	ENSMUSG00000027581|STMN3
135	ENSMUSG00000031517|GPM6A
136	ENSMUSG00000012848|RPS5
137	ENSMUSG00000041362|4930506M07RIK
138	ENSMUSG00000026042|COL5A2
139	ENSMUSG00000028495|RPS6
140	ENSMUSG00000042978|SBK1
141	ENSMUSG00000058773|HIST1H1B
142	ENSMUSG00000064337|MT-RNR1
143	ENSMUSG00000039830|OLIG2
144	ENSMUSG00000058546|RPL23A
145	ENSMUSG00000019966|KITL
146	ENSMUSG00000086922|GM13835
147	ENSMUSG00000022816|FSTL1
148	ENSMUSG00000074660|GM10736
149	ENSMUSG00000070526|PEG12
150	ENSMUSG00000081251|GM12164
151	ENSMUSG00000006651|APLP1
152	ENSMUSG00000067274|RPLP0
153	ENSMUSG00000024269|5730494M16RIK
154	ENSMUSG00000079587|GPR45
155	ENSMUSG00000093306|AL731857.1
156	ENSMUSG00000074129|RPL13A
157	ENSMUSG00000020524|GRIA1
158	ENSMUSG00000054428|ATPIF1
159	ENSMUSG00000035530|EIF1
160	ENSMUSG00000047414|FLRT2
161	ENSMUSG00000048109|RBM15
162	ENSMUSG00000083200|GM15066
163	ENSMUSG00000064340|MT-TL1
164	ENSMUSG00000021508|CXCL14
165	ENSMUSG00000084093|GM16418
166	ENSMUSG00000040274|CDK6
167	ENSMUSG00000070436|SERPINH1
168	ENSMUSG00000021892|SH3BP5
169	ENSMUSG00000084349|RPL3-PS1
170	ENSMUSG00000026811|ST6GALNAC6
171	ENSMUSG00000048154|MLL2
172	ENSMUSG00000057322|RPL38
173	ENSMUSG00000020950|FOXG1
174	ENSMUSG00000020496|RNF187
175	ENSMUSG00000051627|HIST1H1E
176	ENSMUSG00000024261|SYT4
177	ENSMUSG00000003429|RPS11
178	ENSMUSG00000079111|KDELR2
179	ENSMUSG00000024425|NDFIP1
180	ENSMUSG00000073702|RPL31
181	ENSMUSG00000071533|PCNP
182	ENSMUSG00000044220|NKX2-3
183	ENSMUSG00000000326|COMT
184	ENSMUSG00000076284|AC134452.1
185	ENSMUSG00000057278|SNRPG
186	ENSMUSG00000025451|PAIP1
187	ENSMUSG00000008540|MGST1
188	ENSMUSG00000038718|PBX3
189	ENSMUSG00000000214|TH
190	ENSMUSG00000002341|NCAN
191	ENSMUSG00000078967|GM3272
192	ENSMUSG00000052621|POU3F2
193	ENSMUSG00000029647|PAN3
194	ENSMUSG00000057863|RPL36
195	ENSMUSG00000020649|RRM2
196	ENSMUSG00000022443|MYH9
197	ENSMUSG00000000948|SNRPN
198	ENSMUSG00000032424|SNHG5
199	ENSMUSG00000047907|TSHZ2
200	ENSMUSG00000025508|RPLP2
201	ENSMUSG00000036111|LMO1
202	ENSMUSG00000049539|HIST1H1A
203	ENSMUSG00000007476|LRRC8A
204	ENSMUSG00000079435|RPL36A
205	ENSMUSG00000061808|TTR
206	ENSMUSG00000027907|S100A11
207	ENSMUSG00000042750|BEX2
208	ENSMUSG00000086982|GM8327
209	ENSMUSG00000022521|CREBBP
210	ENSMUSG00000020577|TSPAN13
211	ENSMUSG00000037935|SMARCE1
212	ENSMUSG00000047675|RPS8
213	ENSMUSG00000081208|GM11400
214	ENSMUSG00000048170|MCMBP
215	ENSMUSG00000090313|GM17325
216	ENSMUSG00000026643|NMT2
217	ENSMUSG00000006356|CRIP2
218	ENSMUSG00000027276|JAG1
219	ENSMUSG00000081622|GM5937
220	ENSMUSG00000004366|SST
221	ENSMUSG00000054256|MSI1
222	ENSMUSG00000020152|ACTR2
223	ENSMUSG00000074911|GM17362
224	ENSMUSG00000029712|ACTL6B
225	ENSMUSG00000059291|RPL11
226	ENSMUSG00000020052|ASCL1
227	ENSMUSG00000057367|BIRC2
228	ENSMUSG00000028266|LMO4
229	ENSMUSG00000029472|ANAPC5
230	ENSMUSG00000092805|CT025673.1
231	ENSMUSG00000019927|UBE2D1
232	ENSMUSG00000032826|ANK2
233	ENSMUSG00000030352|TSPAN9
234	ENSMUSG00000025219|FGF8
235	ENSMUSG00000020176|GRB10
236	ENSMUSG00000085334|GM12940
237	ENSMUSG00000028639|YBX1
238	ENSMUSG00000021589|RHOBTB3
239	ENSMUSG00000040952|RPS19
240	ENSMUSG00000066036|UBR4
241	ENSMUSG00000037990|SH3RF3
242	ENSMUSG00000055202|ZFP811
243	ENSMUSG00000032399|RPL4
244	ENSMUSG00000086583|GM15500
245	ENSMUSG00000047112|0610012G03RIK
246	ENSMUSG00000028173|WLS
247	ENSMUSG00000030246|LDHB
248	ENSMUSG00000080896|GM14567
249	ENSMUSG00000083822|HMGB1-PS5
250	ENSMUSG00000034220|GPC1
251	ENSMUSG00000074637|SOX2
252	ENSMUSG00000029312|KLHL8
253	ENSMUSG00000069648|GM3699
254	ENSMUSG00000047261|GAP43
255	ENSMUSG00000027977|NDST3
256	ENSMUSG00000079554|AOX3L1
257	ENSMUSG00000040943|TET2
258	ENSMUSG00000060935|AI597468
259	ENSMUSG00000061477|RPS7
260	ENSMUSG00000026640|PLXNA2
261	ENSMUSG00000022403|ST13
262	ENSMUSG00000030432|RPL28
263	ENSMUSG00000052852|REEP1
264	ENSMUSG00000019874|FABP7
265	ENSMUSG00000020372|GNB2L1
266	ENSMUSG00000056895|HIST3H2BA
267	ENSMUSG00000020329|POLRMT
268	ENSMUSG00000052512|NAV2
269	ENSMUSG00000078684|5830417I10RIK
270	ENSMUSG00000031320|RPS4X
271	ENSMUSG00000004099|DNMT1
272	ENSMUSG00000046580|GM7862
273	ENSMUSG00000029219|SLC10A4
274	ENSMUSG00000086421|GM14091
275	ENSMUSG00000072235|TUBA1A
276	ENSMUSG00000041084|OSTC
277	ENSMUSG00000062647|RPL7A
278	ENSMUSG00000046573|LYRM4
279	ENSMUSG00000045414|1190002N15RIK
280	ENSMUSG00000019923|ZWINT
281	ENSMUSG00000069272|HIST1H2AE
282	ENSMUSG00000020923|UBTF
283	ENSMUSG00000003970|RPL8
284	ENSMUSG00000019803|NR2E1
285	ENSMUSG00000055717|SLAIN1
286	ENSMUSG00000004085|B230120H23RIK
287	ENSMUSG00000006699|CDC42
288	ENSMUSG00000016344|PPDPF
289	ENSMUSG00000027254|MTAP1A
290	ENSMUSG00000030826|BCAT2
291	ENSMUSG00000059195|GM12715
292	ENSMUSG00000040907|ATP1A3
293	ENSMUSG00000008475|ARPC5
294	ENSMUSG00000081455|HMGB1-PS3
295	ENSMUSG00000026833|OLFM1
296	ENSMUSG00000000740|RPL13
297	ENSMUSG00000058793|CDS2
298	ENSMUSG00000001300|EFNB2
299	ENSMUSG00000025348|ITGA7
300	ENSMUSG00000068696|GPR88
301	ENSMUSG00000021670|HMGCR
302	ENSMUSG00000066705|FXYD6
303	ENSMUSG00000039671|ZMYND8
304	ENSMUSG00000020863|LUC7L3
305	ENSMUSG00000007415|GATAD1
306	ENSMUSG00000049184|PURG
307	ENSMUSG00000038872|ZFHX3
308	ENSMUSG00000039740|ALG2
309	ENSMUSG00000063316|RPL27
310	ENSMUSG00000026235|EPHA4
311	ENSMUSG00000026426|ARL8A
312	ENSMUSG00000090862|RPS13
313	ENSMUSG00000033379|ATP6V0B
314	ENSMUSG00000036478|BTG1
315	ENSMUSG00000029819|NPY
316	ENSMUSG00000036295|LRRN3
317	ENSMUSG00000027122|2700007P21RIK
318	ENSMUSG00000023022|LIMA1
319	ENSMUSG00000038526|CAR14
320	ENSMUSG00000033364|USP37
321	ENSMUSG00000022708|ZBTB20
322	ENSMUSG00000042650|ALKBH5
323	ENSMUSG00000058589|ANKS1B
324	ENSMUSG00000052155|ACVR2A
325	ENSMUSG00000068823|CSDE1
326	ENSMUSG00000027523|GNAS
327	ENSMUSG00000082192|GM14719
328	ENSMUSG00000029755|DLX5
329	ENSMUSG00000047904|SSTR2
330	ENSMUSG00000034789|RAB24
331	ENSMUSG00000059552|TRP53
332	ENSMUSG00000027660|SKIL
333	ENSMUSG00000089944|GM8292
334	ENSMUSG00000028518|PRKAA2
335	ENSMUSG00000038805|SIX3
336	ENSMUSG00000091337|EID1
337	ENSMUSG00000020460|RPS27A
338	ENSMUSG00000001228|UHRF1
339	ENSMUSG00000029462|VPS29
340	ENSMUSG00000029838|PTN
341	ENSMUSG00000028926|CDK14
342	ENSMUSG00000001847|RAC1
343	ENSMUSG00000020440|ARF5
344	ENSMUSG00000022364|WDR67
345	ENSMUSG00000062997|RPL35
346	ENSMUSG00000022451|TWF1
347	ENSMUSG00000022894|ADAMTS5
348	ENSMUSG00000056904|GM5620
349	ENSMUSG00000079037|PRNP
350	ENSMUSG00000061436|HIPK2
351	ENSMUSG00000030744|RPS3
352	ENSMUSG00000049775|TMSB4X
353	ENSMUSG00000007944|TTC9B
354	ENSMUSG00000007670|KHSRP
355	ENSMUSG00000019998|STX7
356	ENSMUSG00000017404|RPL19
357	ENSMUSG00000037664|CDKN1C
358	ENSMUSG00000027499|PKIA
359	ENSMUSG00000060032|H2AFJ
360	ENSMUSG00000043004|GNG2
361	ENSMUSG00000046364|RPL27A
362	ENSMUSG00000061607|MDC1
363	ENSMUSG00000022272|MYO10
364	ENSMUSG00000087143|A830082K12RIK
365	ENSMUSG00000029581|FSCN1
366	ENSMUSG00000033102|CDC14B
367	ENSMUSG00000032410|XRN1
368	ENSMUSG00000027849|SYT6
369	ENSMUSG00000031245|HMGN5
370	ENSMUSG00000033792|ATP7A
371	ENSMUSG00000024426|ATAT1
372	ENSMUSG00000079884|GM10698
373	ENSMUSG00000029821|DFNA5
374	ENSMUSG00000083099|GM4732
375	ENSMUSG00000052584|SERP2
376	ENSMUSG00000064341|MT-ND1
377	ENSMUSG00000093314|AC129217.1
378	ENSMUSG00000000632|SEZ6
379	ENSMUSG00000042489|CLSPN
380	ENSMUSG00000018666|CBX1
381	ENSMUSG00000052957|GAS1
382	ENSMUSG00000067579|GM8210
383	ENSMUSG00000039801|2410089E03RIK
384	ENSMUSG00000044636|CSRNP2
385	ENSMUSG00000017144|RND3
386	ENSMUSG00000004961|SYT5
387	ENSMUSG00000025372|BAIAP2
388	ENSMUSG00000026193|FN1
389	ENSMUSG00000030796|TEAD2
390	ENSMUSG00000035413|TMEM98
391	ENSMUSG00000022130|TGDS
392	ENSMUSG00000089542|SNOU6-77
393	ENSMUSG00000025817|NUDT5
394	ENSMUSG00000004558|NDRG2
395	ENSMUSG00000029121|CRMP1
396	ENSMUSG00000006586|RUNX1T1
397	ENSMUSG00000034486|GBX2
398	ENSMUSG00000048747|E130114P18RIK
399	ENSMUSG00000086614|GM14330
400	ENSMUSG00000003199|MPND
401	ENSMUSG00000082108|GM13777
402	ENSMUSG00000026360|RGS2
403	ENSMUSG00000005917|OTX1
404	ENSMUSG00000001642|AKR1B3
405	ENSMUSG00000034210|4732418C07RIK
406	ENSMUSG00000044461|SHISA2
407	ENSMUSG00000031765|MT1
408	ENSMUSG00000024853|SF3B2
409	ENSMUSG00000074561|GM10717
410	ENSMUSG00000032024|9030425E11RIK
411	ENSMUSG00000037563|RPS16
412	ENSMUSG00000040856|DLK1
413	ENSMUSG00000060012|KIF13B
414	ENSMUSG00000049124|GM8186
415	ENSMUSG00000008036|AP2S1
416	ENSMUSG00000082580|GM13182
417	ENSMUSG00000033849|B3GALT2
418	ENSMUSG00000092072|GM4540
419	ENSMUSG00000016541|ATXN10
420	ENSMUSG00000052504|EPHA3
421	ENSMUSG00000044934|ZFP367
422	ENSMUSG00000025854|FAM20C
423	ENSMUSG00000028078|DCLK2
424	ENSMUSG00000059565|GM5292
425	ENSMUSG00000081089|GM14624
426	ENSMUSG00000039197|ADK
427	ENSMUSG00000025228|ACTR1A
428	ENSMUSG00000073656|GM10558
429	ENSMUSG00000025855|PRKAR1B
430	ENSMUSG00000083563|GM13340
431	ENSMUSG00000021687|SCAMP1
432	ENSMUSG00000031858|MAU2
433	ENSMUSG00000084946|DLX1AS
434	ENSMUSG00000002846|4930455C21RIK
435	ENSMUSG00000033952|ASPM
436	ENSMUSG00000092772|AL596130.1
437	ENSMUSG00000070858|GM1673
438	ENSMUSG00000023830|IGF2R
439	ENSMUSG00000024501|DPYSL3
440	ENSMUSG00000020899|PFAS
441	ENSMUSG00000043587|ACPL2
442	ENSMUSG00000056763|CSPP1
443	ENSMUSG00000063696|GM8730
444	ENSMUSG00000022601|RPL24
445	ENSMUSG00000038486|SV2A
446	ENSMUSG00000028583|PDPN
447	ENSMUSG00000002028|MLL1
448	ENSMUSG00000073675|GM10561
449	ENSMUSG00000027546|ATP9A
450	ENSMUSG00000081406|GM13654
451	ENSMUSG00000028580|PUM1
452	ENSMUSG00000020737|HN1
453	ENSMUSG00000026249|SERPINE2
454	ENSMUSG00000038446|CDC40
455	ENSMUSG00000031633|SLC25A4
456	ENSMUSG00000052146|RPS10
457	ENSMUSG00000002265|PEG3
458	ENSMUSG00000024873|CNIH2
459	ENSMUSG00000083626|GM4459
460	ENSMUSG00000031642|SH3RF1
461	ENSMUSG00000032058|PPP2R1B
462	ENSMUSG00000038658|C030046E11RIK
463	ENSMUSG00000006800|SULF2
464	ENSMUSG00000042506|USP22
465	ENSMUSG00000061615|HIST1H2AB
466	ENSMUSG00000017009|SDC4
467	ENSMUSG00000033577|MYO6
468	ENSMUSG00000003038|HMGN2
469	ENSMUSG00000021676|IQGAP2
470	ENSMUSG00000092746|AC156953.1
471	ENSMUSG00000044390|TIGD3
472	ENSMUSG00000050708|FTL1
473	ENSMUSG00000038685|RTEL1
474	ENSMUSG00000025103|BTBD1
475	ENSMUSG00000022122|EDNRB
476	ENSMUSG00000053477|TCF4
477	ENSMUSG00000028643|CCDC23
478	ENSMUSG00000050199|LGR4
479	ENSMUSG00000027602|MAP1LC3A
480	ENSMUSG00000043618|EIF5AL3-PS
481	ENSMUSG00000015143|ACTN1
482	ENSMUSG00000021279|CDC42BPB
483	ENSMUSG00000092559|RP23-195A18.2
484	ENSMUSG00000062328|RPL17
485	ENSMUSG00000031696|VPS35
486	ENSMUSG00000070544|TOP1
487	ENSMUSG00000040725|HNRNPUL1
488	ENSMUSG00000060657|4921513D23RIK
489	ENSMUSG00000022500|LITAF
490	ENSMUSG00000009575|CBX5
491	ENSMUSG00000030869|NDUFAB1
492	ENSMUSG00000024542|CEP192
493	ENSMUSG00000036972|ZIC4
494	ENSMUSG00000001289|PFDN5
495	ENSMUSG00000041540|SOX5
496	ENSMUSG00000088378|U1
497	ENSMUSG00000021877|ARF4
498	ENSMUSG00000032172|OLFM2
499	ENSMUSG00000005958|EPHB3
500	ENSMUSG00000020914|TOP2A
501	ENSMUSG00000027737|SLC7A11
502	ENSMUSG00000019505|UBB
503	ENSMUSG00000017843|PPP2R5C
504	ENSMUSG00000069662|MARCKS
505	ENSMUSG00000002633|SHH
506	ENSMUSG00000063457|RPS15
507	ENSMUSG00000037946|FGD3
508	ENSMUSG00000058600|RPL30
509	ENSMUSG00000026307|SCLY
510	ENSMUSG00000085663|GM15718
511	ENSMUSG00000028693|NASP
512	ENSMUSG00000040037|NEGR1
513	ENSMUSG00000063576|KLHDC3
514	ENSMUSG00000005610|EIF4G2
515	ENSMUSG00000074968|ANO3
516	ENSMUSG00000082691|DYNLT1-PS1
517	ENSMUSG00000055319|SEC23IP
518	ENSMUSG00000028409|SMU1
519	ENSMUSG00000016624|PHF21B
520	ENSMUSG00000063328|GM9396
521	ENSMUSG00000054717|HMGB2
522	ENSMUSG00000037355|4933407H18RIK
523	ENSMUSG00000040225|PRRC2C
524	ENSMUSG00000029414|KNTC1
525	ENSMUSG00000074884|SERF2
526	ENSMUSG00000017978|CADPS2
527	ENSMUSG00000017376|NLK
528	ENSMUSG00000057110|CEP110
529	ENSMUSG00000093283|AC102240.1
530	ENSMUSG00000022841|AP2M1
531	ENSMUSG00000003131|PAFAH1B2
532	ENSMUSG00000034024|CCT2
533	ENSMUSG00000029860|ZYX
534	ENSMUSG00000052534|PBX1
535	ENSMUSG00000055435|MAF
536	ENSMUSG00000024603|DCTN4
537	ENSMUSG00000025353|ORMDL2
538	ENSMUSG00000023944|HSP90AB1
539	ENSMUSG00000066306|NUMA1
540	ENSMUSG00000031153|GRIPAP1
541	ENSMUSG00000021288|KLC1
542	ENSMUSG00000007817|ZMIZ1
543	ENSMUSG00000057113|NPM1
544	ENSMUSG00000039354|SMARCAL1
545	ENSMUSG00000066002|GM13237
546	ENSMUSG00000024197|PLIN3
547	ENSMUSG00000022119|RBM26
548	ENSMUSG00000026356|DARS
549	ENSMUSG00000026309|ILKAP
550	ENSMUSG00000035357|PDZRN3
551	ENSMUSG00000047986|PALM3
552	ENSMUSG00000032667|PON2
553	ENSMUSG00000061971|GM10106
554	ENSMUSG00000039630|HNRNPU
555	ENSMUSG00000042436|MFAP4
556	ENSMUSG00000057666|GAPDH
557	ENSMUSG00000026335|PAM
558	ENSMUSG00000025651|UQCRC1
559	ENSMUSG00000043223|GM4835
560	ENSMUSG00000020029|NUDT4
561	ENSMUSG00000037487|UBR5
562	ENSMUSG00000041126|H2AFV
563	ENSMUSG00000001054|RMND5B
564	ENSMUSG00000020368|CANX
565	ENSMUSG00000034675|DBN1
566	ENSMUSG00000068396|RPL34-PS1
567	ENSMUSG00000028249|SDCBP
568	ENSMUSG00000031004|MKI67
569	ENSMUSG00000029638|GLCCI1
570	ENSMUSG00000000409|LCK
571	ENSMUSG00000031367|AP1S2
572	ENSMUSG00000043909|TRP53BP1
573	ENSMUSG00000041923|NOL4
574	ENSMUSG00000031963|BMPER
575	ENSMUSG00000050428|FBXO46
576	ENSMUSG00000064128|CENPJ
577	ENSMUSG00000029134|PLB1
578	ENSMUSG00000091299|SNHG7
579	ENSMUSG00000031129|SLC9A9
580	ENSMUSG00000045328|CENPE
581	ENSMUSG00000069170|GPR98
582	ENSMUSG00000074415|2610203C20RIK
583	ENSMUSG00000054165|4922502B01RIK
584	ENSMUSG00000032449|SLC25A36
585	ENSMUSG00000091028|GM10722
586	ENSMUSG00000041309|NKX6-2
587	ENSMUSG00000006442|SRM
588	ENSMUSG00000047844|BEX4
589	ENSMUSG00000021720|RNF180
590	ENSMUSG00000046985|TAPT1
591	ENSMUSG00000029432|GBAS
592	ENSMUSG00000059326|CSF2RA
593	ENSMUSG00000008892|VDAC3
594	ENSMUSG00000030846|TIAL1
595	ENSMUSG00000041408|WAPAL
596	ENSMUSG00000041203|2310036O22RIK
597	ENSMUSG00000092350|VMN1R-PS62
598	ENSMUSG00000026434|NUCKS1
599	ENSMUSG00000027447|CST3
600	ENSMUSG00000022283|PABPC1
601	ENSMUSG00000034437|GM9761
602	ENSMUSG00000071866|PPIA
603	ENSMUSG00000000567|SOX9
604	ENSMUSG00000039323|IGFBP2
605	ENSMUSG00000092046|GM6450
606	ENSMUSG00000046157|TMEM229B
607	ENSMUSG00000029922|MKRN1
608	ENSMUSG00000015120|UBE2I
609	ENSMUSG00000020716|NF1
610	ENSMUSG00000039001|RPS21
611	ENSMUSG00000000581|C1D
612	ENSMUSG00000062373|TMEM65
613	ENSMUSG00000027009|ITGA4
614	ENSMUSG00000022054|NEFM
615	ENSMUSG00000025369|SMARCC2
616	ENSMUSG00000028792|AK2
617	ENSMUSG00000022489|PDE1B
618	ENSMUSG00000019432|DDX39B
619	ENSMUSG00000082809|GM14150
620	ENSMUSG00000026923|NOTCH1
621	ENSMUSG00000015217|HMGB3
622	ENSMUSG00000037152|NDUFC1
623	ENSMUSG00000029247|PAICS
624	ENSMUSG00000064036|MRO
625	ENSMUSG00000028161|PPP3CA
626	ENSMUSG00000028668|TCEB3
627	ENSMUSG00000092065|GM17241
628	ENSMUSG00000004031|FAM5B
629	ENSMUSG00000061751|KALRN
630	ENSMUSG00000049832|GM9840
631	ENSMUSG00000031189|AFF2
632	ENSMUSG00000054823|WHSC1L1
633	ENSMUSG00000032118|FEZ1
634	ENSMUSG00000082606|GM14638
635	ENSMUSG00000031231|COX7B
636	ENSMUSG00000021131|ERH
637	ENSMUSG00000039478|EFHA2
638	ENSMUSG00000042675|YPEL3
639	ENSMUSG00000047881|RELL1
640	ENSMUSG00000032171|PIN1
641	ENSMUSG00000026135|ZFP142
642	ENSMUSG00000026563|TADA1
643	ENSMUSG00000010362|RDM1
644	ENSMUSG00000062083|RPL13A-PS1
645	ENSMUSG00000019494|COPS6
646	ENSMUSG00000022682|RRN3
647	ENSMUSG00000020607|FAM84A
648	ENSMUSG00000070519|RPL35A-PS6
649	ENSMUSG00000029333|RASGEF1B
650	ENSMUSG00000047945|MARCKSL1
651	ENSMUSG00000028494|PLIN2
652	ENSMUSG00000033981|GRIA2
653	ENSMUSG00000030697|PPP4C
654	ENSMUSG00000027242|WDR76
655	ENSMUSG00000037072|SEP15
656	ENSMUSG00000006057|ATP5G1
657	ENSMUSG00000006373|PGRMC1
658	ENSMUSG00000022141|NIPBL
659	ENSMUSG00000056579|TUG1
660	ENSMUSG00000038807|RAP1GAP2
661	ENSMUSG00000008683|RPS15A
662	ENSMUSG00000020483|DYNLL2
663	ENSMUSG00000025261|HUWE1
664	ENSMUSG00000045095|MAGI1
665	ENSMUSG00000030805|STX4A
666	ENSMUSG00000038822|HACE1
667	ENSMUSG00000058886|DEAF1
668	ENSMUSG00000056854|POU3F4
669	ENSMUSG00000034868|MYL12B
670	ENSMUSG00000074553|GM10713
671	ENSMUSG00000004151|ETV1
672	ENSMUSG00000055762|EEF1D
673	ENSMUSG00000052450|2810055G20RIK
674	ENSMUSG00000041720|PI4KA
675	ENSMUSG00000049932|H2AFX
676	ENSMUSG00000015092|EDF1
677	ENSMUSG00000029036|ATAD3A
678	ENSMUSG00000041144|DNAHC7B
679	ENSMUSG00000032640|CHSY1
680	ENSMUSG00000005533|IGF1R
681	ENSMUSG00000025156|GPS1
682	ENSMUSG00000041453|RPL21
683	ENSMUSG00000039202|ABHD2
684	ENSMUSG00000041959|S100A10
685	ENSMUSG00000091421|GM17510
686	ENSMUSG00000067860|ZIC3
687	ENSMUSG00000053293|POM121
688	ENSMUSG00000032221|MNS1
689	ENSMUSG00000042605|ATXN2
690	ENSMUSG00000026313|HDAC4
691	ENSMUSG00000031728|ZFP821
692	ENSMUSG00000023118|SYMPK
693	ENSMUSG00000020922|LSM12
694	ENSMUSG00000031812|MAP1LC3B
695	ENSMUSG00000026857|METTL11A
696	ENSMUSG00000048216|GPR85
697	ENSMUSG00000032038|ST3GAL4
698	ENSMUSG00000057058|SKAP1
699	ENSMUSG00000082838|GM14519
700	ENSMUSG00000060988|GALNT13
701	ENSMUSG00000037805|RPL10A
702	ENSMUSG00000041911|DLX1
703	ENSMUSG00000003031|CDKN1B
704	ENSMUSG00000026234|NCL
705	ENSMUSG00000056851|PCBP2
706	ENSMUSG00000073460|PNLDC1
707	ENSMUSG00000044341|GM5601
708	ENSMUSG00000033713|FOXN3
709	ENSMUSG00000031948|KARS
710	ENSMUSG00000026271|GPR35
711	ENSMUSG00000057990|E030024N20RIK
712	ENSMUSG00000022551|CYC1
713	ENSMUSG00000044794|9330133O14RIK
714	ENSMUSG00000069729|ARID1B
715	ENSMUSG00000035314|GDPD5
716	ENSMUSG00000038605|SAMD10
717	ENSMUSG00000069833|AHNAK
718	ENSMUSG00000032370|LACTB
719	ENSMUSG00000038252|NCAPD2
720	ENSMUSG00000061724|GM2423
721	ENSMUSG00000026669|MCM10
722	ENSMUSG00000001517|FOXM1
723	ENSMUSG00000027739|RAB33B
724	ENSMUSG00000038664|HERC1
725	ENSMUSG00000028851|NUDC
726	ENSMUSG00000024205|RPL36-PS2
727	ENSMUSG00000024073|BIRC6
728	ENSMUSG00000018451|6330403K07RIK
729	ENSMUSG00000039701|USP53
730	ENSMUSG00000030678|MAZ
731	ENSMUSG00000055799|TCF7L1
732	ENSMUSG00000075279|MRPL23-PS1
733	ENSMUSG00000018411|MAPT
734	ENSMUSG00000042208|0610010F05RIK
735	ENSMUSG00000039145|CAMK1D
736	ENSMUSG00000039985|FAM60A
737	ENSMUSG00000041272|TOX
738	ENSMUSG00000042606|HIRIP3
739	ENSMUSG00000030555|TTC23
740	ENSMUSG00000025255|ZFHX4
741	ENSMUSG00000031146|PLP2
742	ENSMUSG00000060636|RPL35A
743	ENSMUSG00000029510|GPC2
744	ENSMUSG00000042029|NCAPG2
745	ENSMUSG00000034190|CHMP7
746	ENSMUSG00000066245|GM10156
747	ENSMUSG00000044709|GEMIN7
748	ENSMUSG00000021707|DHFR
749	ENSMUSG00000004771|RAB11A
750	ENSMUSG00000021500|DDX46
751	ENSMUSG00000033581|IGF2BP2
752	ENSMUSG00000028214|GEM
753	ENSMUSG00000063450|SYNE2
754	ENSMUSG00000031575|ASH2L
755	ENSMUSG00000061313|DDHD2
756	ENSMUSG00000074562|GM10718
757	ENSMUSG00000051243|ISLR2
758	ENSMUSG00000083097|GM14494
759	ENSMUSG00000004865|SRPK1
760	ENSMUSG00000078859|GM17491
761	ENSMUSG00000071644|EEF1G
762	ENSMUSG00000091580|GM6467
763	ENSMUSG00000038187|BTBD10
764	ENSMUSG00000021273|FDFT1
765	ENSMUSG00000046434|HNRNPA1
766	ENSMUSG00000022040|EPHX2
767	ENSMUSG00000084106|GM6136
768	ENSMUSG00000082196|GM14231
769	ENSMUSG00000062309|RPP25
770	ENSMUSG00000031256|CSTF2
771	ENSMUSG00000027014|CWC22
772	ENSMUSG00000057134|ADO
773	ENSMUSG00000020547|BZW2
774	ENSMUSG00000024480|AP3S1
775	ENSMUSG00000028199|CRYZ
776	ENSMUSG00000031078|CTTN
777	ENSMUSG00000000976|HEATR6
778	ENSMUSG00000042541|SHFM1
779	ENSMUSG00000029033|ACAP3
780	ENSMUSG00000032216|NEDD4
781	ENSMUSG00000085946|AA387200
782	ENSMUSG00000090439|GM17455
783	ENSMUSG00000085234|GM15614
784	ENSMUSG00000024534|SNCAIP
785	ENSMUSG00000026950|NEB
786	ENSMUSG00000009035|TMEM184B
787	ENSMUSG00000081214|RPL35A-PS2
788	ENSMUSG00000033578|TMEM35
789	ENSMUSG00000030536|IQGAP1
790	ENSMUSG00000014601|FAM40A
791	ENSMUSG00000000031|H19
792	ENSMUSG00000020849|YWHAE
793	ENSMUSG00000092325|RP24-216B4.2
794	ENSMUSG00000043300|B3GALNT1
795	ENSMUSG00000000339|RTCD1
796	ENSMUSG00000038506|DCUN1D2
797	ENSMUSG00000092771|AC149593.1
798	ENSMUSG00000047171|HELT
799	ENSMUSG00000028998|TOMM7
800	ENSMUSG00000051278|4930422G04RIK
801	ENSMUSG00000041688|AMOT
802	ENSMUSG00000062588|GM6104
803	ENSMUSG00000032336|NPTN
804	ENSMUSG00000029501|ANKLE2
805	ENSMUSG00000048756|FOXO3
806	ENSMUSG00000026305|LRRFIP1
807	ENSMUSG00000020022|NDUFA12
808	ENSMUSG00000014551|MRPS25
809	ENSMUSG00000026274|PASK
810	ENSMUSG00000064999|7SK
811	ENSMUSG00000020190|MKNK2
812	ENSMUSG00000029687|EZH2
813	ENSMUSG00000030849|FGFR2
814	ENSMUSG00000022860|CHODL
815	ENSMUSG00000006299|AAMP
816	ENSMUSG00000051910|SOX6
817	ENSMUSG00000023087|CCRN4L
818	ENSMUSG00000055302|MRFAP1
819	ENSMUSG00000055720|UBL7
820	ENSMUSG00000087514|GM16076
821	ENSMUSG00000030067|FOXP1
822	ENSMUSG00000037622|WDTC1
823	ENSMUSG00000051373|PPAPDC3
824	ENSMUSG00000019982|MYB
825	ENSMUSG00000042331|SPECC1
826	ENSMUSG00000085603|GM11346
827	ENSMUSG00000081788|GM5898
828	ENSMUSG00000081992|GM13408
829	ENSMUSG00000036099|VEZT
830	ENSMUSG00000038025|PHF2
831	ENSMUSG00000024985|TCF7L2
832	ENSMUSG00000073733|6330545A04RIK
833	ENSMUSG00000028273|PDLIM5
834	ENSMUSG00000081726|GM13202
835	ENSMUSG00000028982|SLC25A33
836	ENSMUSG00000031104|RAB33A
837	ENSMUSG00000024213|NUDT3
838	ENSMUSG00000041133|SMC1A
839	ENSMUSG00000052565|HIST1H1D
840	ENSMUSG00000091478|GM10039
841	ENSMUSG00000048349|POU4F1
842	ENSMUSG00000003534|DDR1
843	ENSMUSG00000027186|ELF5
844	ENSMUSG00000040928|S100PBP
845	ENSMUSG00000001988|NPAS1
846	ENSMUSG00000020978|KLHDC2
847	ENSMUSG00000024091|VAPA
848	ENSMUSG00000087604|4930452L02RIK
849	ENSMUSG00000034641|CD300LD
850	ENSMUSG00000085320|GM11548
851	ENSMUSG00000026278|BOK
852	ENSMUSG00000028945|RHEB
853	ENSMUSG00000064768|SNORD60
854	ENSMUSG00000019027|DNAHC1
855	ENSMUSG00000028086|FBXW7
856	ENSMUSG00000020423|BTG2
857	ENSMUSG00000026500|FAM36A
858	ENSMUSG00000030774|PAK1
859	ENSMUSG00000046841|CKAP4
860	ENSMUSG00000086324|GM15564
861	ENSMUSG00000029629|PHF14
862	ENSMUSG00000028484|PSIP1
863	ENSMUSG00000024914|DRAP1
864	ENSMUSG00000030539|SEMA4B
865	ENSMUSG00000082884|GM13339
866	ENSMUSG00000044707|CCNJL
867	ENSMUSG00000014453|BLK
868	ENSMUSG00000034959|5031414D18RIK
869	ENSMUSG00000020086|H2AFY2
870	ENSMUSG00000035772|MRPS2
871	ENSMUSG00000040651|D14ABB1E
872	ENSMUSG00000028978|NOS3
873	ENSMUSG00000029304|SPP1
874	ENSMUSG00000075053|VDAC3-PS1
875	ENSMUSG00000040850|PSME4
876	ENSMUSG00000082926|GM8172
877	ENSMUSG00000053119|CHMP3
878	ENSMUSG00000078612|1700024P16RIK
879	ENSMUSG00000034390|4933407C03RIK
880	ENSMUSG00000022312|EIF3H
881	ENSMUSG00000020929|EFTUD2
882	ENSMUSG00000011382|DHDH
883	ENSMUSG00000020576|NBAS
884	ENSMUSG00000082872|GM15773
885	ENSMUSG00000052681|RAP1B
886	ENSMUSG00000040681|HMGN1
887	ENSMUSG00000060981|HIST1H4H
888	ENSMUSG00000037876|JMJD1C
889	ENSMUSG00000027584|OPRL1
890	ENSMUSG00000074457|S100A16
891	ENSMUSG00000033938|NDUFB7
892	ENSMUSG00000053877|SRCAP
893	ENSMUSG00000007892|RPLP1
894	ENSMUSG00000028221|TMEM55A
895	ENSMUSG00000004631|SGCE
896	ENSMUSG00000037710|CISD1
897	ENSMUSG00000032262|ELOVL4
898	ENSMUSG00000020163|UQCR11
899	ENSMUSG00000073406|H2-BL
900	ENSMUSG00000031137|FGF13
901	ENSMUSG00000041729|CORO2B
902	ENSMUSG00000067071|HES6
903	ENSMUSG00000024646|CYB5
904	ENSMUSG00000006398|CDC20
905	ENSMUSG00000057672|PKN1
906	ENSMUSG00000050910|CDR2L
907	ENSMUSG00000026188|TMEM169
908	ENSMUSG00000047115|D330028D13RIK
909	ENSMUSG00000022378|FAM49B
910	ENSMUSG00000033272|SLC35A4
911	ENSMUSG00000027184|CAPRIN1
912	ENSMUSG00000056900|USP13
913	ENSMUSG00000057614|GNAI1
914	ENSMUSG00000022044|STMN4
915	ENSMUSG00000027253|LRP4
916	ENSMUSG00000022382|WNT7B
917	ENSMUSG00000058230|GRLF1
918	ENSMUSG00000022323|HRSP12
919	ENSMUSG00000038725|PKHD1L1
920	ENSMUSG00000041263|RUSC1
921	ENSMUSG00000019558|SLC6A8
922	ENSMUSG00000026192|ATIC
923	ENSMUSG00000063694|CYCS
924	ENSMUSG00000053754|CHD8
925	ENSMUSG00000041921|METAP1D
926	ENSMUSG00000080921|RPL38-PS2
927	ENSMUSG00000025364|PA2G4
928	ENSMUSG00000027967|NEUROG2
929	ENSMUSG00000035864|SYT1
930	ENSMUSG00000039533|MMD2
931	ENSMUSG00000060510|ZFP266
932	ENSMUSG00000054074|2810030E01RIK
933	ENSMUSG00000001855|NUP214
934	ENSMUSG00000046408|1700067K01RIK
935	ENSMUSG00000021395|SPIN1
936	ENSMUSG00000060128|GM10075
937	ENSMUSG00000083734|GM16209
938	ENSMUSG00000034684|SEMA3F
939	ENSMUSG00000000088|COX5A
940	ENSMUSG00000036510|CDH8
941	ENSMUSG00000022793|B4GALT4
942	ENSMUSG00000028800|HDAC1
943	ENSMUSG00000024661|FTH1
944	ENSMUSG00000029231|PDGFRA
945	ENSMUSG00000062184|HS6ST2
946	ENSMUSG00000050953|GJA1
947	ENSMUSG00000090523|GYPC
948	ENSMUSG00000072451|GM10359
949	ENSMUSG00000023991|FOXP4
950	ENSMUSG00000039089|L3MBTL3
951	ENSMUSG00000021759|PPAP2A
952	ENSMUSG00000023764|SFI1
953	ENSMUSG00000005575|UBE2M
954	ENSMUSG00000073940|HBB-B2
955	ENSMUSG00000040761|SPEN
956	ENSMUSG00000016526|DYRK3
957	ENSMUSG00000083327|VCP-RS
958	ENSMUSG00000081888|GM14045
959	ENSMUSG00000082345|GM13622
960	ENSMUSG00000022883|ROBO1
961	ENSMUSG00000032966|FKBP1A
962	ENSMUSG00000036833|PNPLA7
963	ENSMUSG00000031990|JAM3
964	ENSMUSG00000029603|DTX1
965	ENSMUSG00000001313|RND2
966	ENSMUSG00000084098|GM13422
967	ENSMUSG00000066406|AKAP13
968	ENSMUSG00000003779|KIF20A
969	ENSMUSG00000000838|FMR1
970	ENSMUSG00000085133|B930095G15RIK
971	ENSMUSG00000028222|CALB1
972	ENSMUSG00000082860|GM13204
973	ENSMUSG00000035696|RNF38
974	ENSMUSG00000044117|2900011O08RIK
975	ENSMUSG00000082207|GM12998
976	ENSMUSG00000037096|GM9762
977	ENSMUSG00000038274|FAU
978	ENSMUSG00000040481|BPTF
979	ENSMUSG00000015776|MED22
980	ENSMUSG00000022553|MAF1
981	ENSMUSG00000032481|SMARCC1
982	ENSMUSG00000060743|H3F3A
983	ENSMUSG00000026333|GIN1
984	ENSMUSG00000042390|GATAD2B
985	ENSMUSG00000040720|1110037F02RIK
986	ENSMUSG00000030342|CD9
987	ENSMUSG00000027748|TRPC4
988	ENSMUSG00000084289|GM6977
989	ENSMUSG00000041977|ARHGEF11
990	ENSMUSG00000021318|GLI3
991	ENSMUSG00000021265|SLC25A29
992	ENSMUSG00000062846|GM14176
993	ENSMUSG00000024975|PDCD4
994	ENSMUSG00000080542|U4ATAC
995	ENSMUSG00000032047|ACAT1
996	ENSMUSG00000063663|BRWD3
997	ENSMUSG00000030269|MTMR14
998	ENSMUSG00000091666|GM17717
999	ENSMUSG00000082706|GM11663
1000	ENSMUSG00000060572|MFAP2
1001	ENSMUSG00000033237|ARID2
1002	ENSMUSG00000034906|NCAPH
1003	ENSMUSG00000020376|RNF130
1004	ENSMUSG00000021686|AP3B1
1005	ENSMUSG00000086193|GM11508
1006	ENSMUSG00000042744|GM15800
1007	ENSMUSG00000024530|SLMO1
1008	ENSMUSG00000021963|SAP18
1009	ENSMUSG00000071647|EML3
1010	ENSMUSG00000042742|B630005N14RIK
1011	ENSMUSG00000028702|RAD54L
1012	ENSMUSG00000041852|TCF20
1013	ENSMUSG00000063427|GM8017
1014	ENSMUSG00000056820|TSNAX
1015	ENSMUSG00000021417|ECI2
1016	ENSMUSG00000048997|ATXN7L2
1017	ENSMUSG00000027560|DOK5
1018	ENSMUSG00000010277|2610507B11RIK
1019	ENSMUSG00000025949|PIKFYVE
1020	ENSMUSG00000085554|AI854517
1021	ENSMUSG00000083166|GM8648
1022	ENSMUSG00000042870|TOM1
1023	ENSMUSG00000058799|NAP1L1
1024	ENSMUSG00000085099|GM16288
1025	ENSMUSG00000061315|NACA
1026	ENSMUSG00000005103|WDR1
1027	ENSMUSG00000003778|BRD8
1028	ENSMUSG00000019877|SERINC1
1029	ENSMUSG00000062591|TUBB4
1030	ENSMUSG00000060534|DCC
1031	ENSMUSG00000021546|HNRNPK
1032	ENSMUSG00000032112|TRAPPC4
1033	ENSMUSG00000035277|ARX
1034	ENSMUSG00000042284|ITGA1
1035	ENSMUSG00000086768|GM16827
1036	ENSMUSG00000058881|ZFP516
1037	ENSMUSG00000028617|LRRC42
1038	ENSMUSG00000030672|MYLPF
1039	ENSMUSG00000028778|HCRTR1
1040	ENSMUSG00000092203|1110038B12RIK
1041	ENSMUSG00000082896|GM5844
1042	ENSMUSG00000041415|DICER1
1043	ENSMUSG00000026464|ZC3H11A
1044	ENSMUSG00000022629|KIF21A
1045	ENSMUSG00000027500|STMN2
1046	ENSMUSG00000044285|GM1821
1047	ENSMUSG00000038555|REEP2
1048	ENSMUSG00000032348|GSTA4
1049	ENSMUSG00000043556|FBXL7
1050	ENSMUSG00000033400|AGL
1051	ENSMUSG00000037169|MYCN
1052	ENSMUSG00000006574|SLC4A1
1053	ENSMUSG00000020900|MYH10
1054	ENSMUSG00000032228|TCF12
1055	ENSMUSG00000040701|AP1G2
1056	ENSMUSG00000038773|KDM3B
1057	ENSMUSG00000027809|ETFDH
1058	ENSMUSG00000028248|SFRS18
1059	ENSMUSG00000031134|RBMX
1060	ENSMUSG00000048834|VSTM2A
1061	ENSMUSG00000007021|SYNGR3
1062	ENSMUSG00000003033|AP1M1
1063	ENSMUSG00000058806|COL13A1
1064	ENSMUSG00000007721|CCDC124
1065	ENSMUSG00000023216|EPB4.2
1066	ENSMUSG00000052911|LAMB2
1067	ENSMUSG00000016933|PLCG1
1068	ENSMUSG00000070319|EIF3G
1069	ENSMUSG00000068735|TRP53I11
1070	ENSMUSG00000006678|POLA1
1071	ENSMUSG00000058542|GM15590
1072	ENSMUSG00000029502|GOLGA3
1073	ENSMUSG00000027495|2010011I20RIK
1074	ENSMUSG00000027671|ACTL6A
1075	ENSMUSG00000069132|NXPH2
1076	ENSMUSG00000036875|DNA2
1077	ENSMUSG00000025351|CD63
1078	ENSMUSG00000062270|MORF4L1
1079	ENSMUSG00000033533|ACSM1
1080	ENSMUSG00000043029|TRPV3
1081	ENSMUSG00000011751|SPNB4
1082	ENSMUSG00000045877|4933415A04RIK
1083	ENSMUSG00000087528|9830144P21RIK
1084	ENSMUSG00000022822|ABCC5
1085	ENSMUSG00000030583|SIPA1L3
1086	ENSMUSG00000043388|TMEM130
1087	ENSMUSG00000022912|PROS1
1088	ENSMUSG00000036880|ACAA2
1089	ENSMUSG00000039967|ZFP292
1090	ENSMUSG00000064325|HHIP
1091	ENSMUSG00000057762|GM6169
1092	ENSMUSG00000028691|PRDX1
1093	ENSMUSG00000065259|SNORA30
1094	ENSMUSG00000022668|GTPBP8
1095	ENSMUSG00000043284|TMEM11
1096	ENSMUSG00000059975|ZFP74
1097	ENSMUSG00000022577|LY6H
1098	ENSMUSG00000024107|LHCGR
1099	ENSMUSG00000004018|FANCL
1100	ENSMUSG00000024924|VLDLR
1101	ENSMUSG00000023004|TUBA1B
1102	ENSMUSG00000032827|PPP1R9A
1103	ENSMUSG00000074749|PLK1S1
1104	ENSMUSG00000026872|ZEB2
1105	ENSMUSG00000024190|DUSP1
1106	ENSMUSG00000025997|IKZF2
1107	ENSMUSG00000089883|GM3355
1108	ENSMUSG00000055214|PLD5
1109	ENSMUSG00000058101|1700084J12RIK
1110	ENSMUSG00000058291|ZFP68
1111	ENSMUSG00000039158|AKNA
1112	ENSMUSG00000005672|KIT
1113	ENSMUSG00000081541|GM13940
1114	ENSMUSG00000068036|MLLT4
1115	ENSMUSG00000024079|EIF2AK2
1116	ENSMUSG00000086027|GM11250
1117	ENSMUSG00000031197|VBP1
1118	ENSMUSG00000034334|FAM151B
1119	ENSMUSG00000029705|CUX1
1120	ENSMUSG00000055333|FAT2
1121	ENSMUSG00000028005|GUCY1B3
1122	ENSMUSG00000028271|GTF2B
1123	ENSMUSG00000011884|GLTP
1124	ENSMUSG00000059248|SEPT9
1125	ENSMUSG00000032050|RDX
1126	ENSMUSG00000020717|PECAM1
1127	ENSMUSG00000034254|AGPAT1
1128	ENSMUSG00000042109|CSDC2
1129	ENSMUSG00000025439|CLNS1A
1130	ENSMUSG00000057387|4922502B01RIK
1131	ENSMUSG00000061702|TMEM91
1132	ENSMUSG00000020258|GLYCTK
1133	ENSMUSG00000093098|AC115697.1
1134	ENSMUSG00000021356|IRF4
1135	ENSMUSG00000024777|PPP2R5B
1136	ENSMUSG00000045999|AY036118
1137	ENSMUSG00000026843|FUBP3
1138	ENSMUSG00000083396|GM15542
1139	ENSMUSG00000085245|GM11713
1140	ENSMUSG00000022471|XRCC6
1141	ENSMUSG00000068587|MGAM
1142	ENSMUSG00000047669|MSL3L2
1143	ENSMUSG00000050856|ATP5K
1144	ENSMUSG00000084159|GM12696
1145	ENSMUSG00000058325|DOCK1
1146	ENSMUSG00000021136|SMOC1
1147	ENSMUSG00000018076|MED13L
1148	ENSMUSG00000026740|DNAJC1
1149	ENSMUSG00000028798|EIF3I
1150	ENSMUSG00000006941|EIF1B
1151	ENSMUSG00000035878|AGPHD1
1152	ENSMUSG00000074591|GM410
1153	ENSMUSG00000084215|GM11814
1154	ENSMUSG00000089177|SNORA25
1155	ENSMUSG00000068923|SYT11
1156	ENSMUSG00000087580|GM16869
1157	ENSMUSG00000021198|UNC79
1158	ENSMUSG00000079487|MED12
1159	ENSMUSG00000024012|MTCH1
1160	ENSMUSG00000028953|ABCF2
1161	ENSMUSG00000063511|SNRNP70
1162	ENSMUSG00000039108|LSM14B
1163	ENSMUSG00000079941|GM11273
1164	ENSMUSG00000044792|ISCA1
1165	ENSMUSG00000049148|PLCXD3
1166	ENSMUSG00000015749|ANP32E
1167	ENSMUSG00000038151|PRDM1
1168	ENSMUSG00000026688|MGST3
1169	ENSMUSG00000074625|ARHGAP40
1170	ENSMUSG00000062825|ACTG1
1171	ENSMUSG00000003949|HLF
1172	ENSMUSG00000066643|WDR35
1173	ENSMUSG00000075334|RPRM
1174	ENSMUSG00000075465|GM10837
1175	ENSMUSG00000020220|VPS13D
1176	ENSMUSG00000035539|E230008N13RIK
1177	ENSMUSG00000037580|GCH1
1178	ENSMUSG00000022043|TRIM35
1179	ENSMUSG00000037706|CD81
1180	ENSMUSG00000048899|RIMKLA
1181	ENSMUSG00000060288|PPIH
1182	ENSMUSG00000073563|CSNK1G3
1183	ENSMUSG00000049421|ZFP260
1184	ENSMUSG00000027574|NKAIN4
1185	ENSMUSG00000014592|CAMTA1
1186	ENSMUSG00000028152|TSPAN5
1187	ENSMUSG00000039218|SRRM2
1188	ENSMUSG00000019842|TRAF3IP2
1189	ENSMUSG00000082160|GM11578
1190	ENSMUSG00000022540|ROGDI
1191	ENSMUSG00000036158|PRICKLE1
1192	ENSMUSG00000003360|DDX23
1193	ENSMUSG00000023175|BSG
1194	ENSMUSG00000015290|UBL4
1195	ENSMUSG00000025893|KBTBD3
1196	ENSMUSG00000075478|SLITRK1
1197	ENSMUSG00000035621|MIDN
1198	ENSMUSG00000012640|ZFP715
1199	ENSMUSG00000024571|GM16286
1200	ENSMUSG00000030638|SH3GL3
1201	ENSMUSG00000056209|NPM3
1202	ENSMUSG00000003039|FAM32A
1203	ENSMUSG00000029765|PLXNA4
1204	ENSMUSG00000025815|DHTKD1
1205	ENSMUSG00000058006|MDN1
1206	ENSMUSG00000047786|LIX1
1207	ENSMUSG00000031781|CIAPIN1
1208	ENSMUSG00000024084|QPCT
1209	ENSMUSG00000035863|PALM
1210	ENSMUSG00000028565|NFIA
1211	ENSMUSG00000031461|MYOM2
1212	ENSMUSG00000039629|FAM40B
1213	ENSMUSG00000017550|ATAD5
1214	ENSMUSG00000006567|ATP7B
1215	ENSMUSG00000082806|RPL13-PS1
1216	ENSMUSG00000091645|GM17591
1217	ENSMUSG00000052133|SEMA5B
1218	ENSMUSG00000022961|SON
1219	ENSMUSG00000037593|BC030499
1220	ENSMUSG00000056364|SIX3OS1
1221	ENSMUSG00000022200|GOLPH3
1222	ENSMUSG00000069769|MSI2
1223	ENSMUSG00000039904|GPR37
1224	ENSMUSG00000026064|PTP4A1
1225	ENSMUSG00000002748|BAZ1B
1226	ENSMUSG00000031823|ZDHHC7
1227	ENSMUSG00000079546|GM11146
1228	ENSMUSG00000003528|SLC25A1
1229	ENSMUSG00000051977|PRDM9
1230	ENSMUSG00000022756|SLC7A4
1231	ENSMUSG00000080877|RPL22-PS1
1232	ENSMUSG00000054827|CYP2C50
1233	ENSMUSG00000027649|CTNNBL1
1234	ENSMUSG00000025932|EYA1
1235	ENSMUSG00000068855|HIST2H2AC
1236	ENSMUSG00000062232|RAPGEF2
1237	ENSMUSG00000029189|SEL1L3
1238	ENSMUSG00000033615|CPLX1
1239	ENSMUSG00000078183|GM15610
1240	ENSMUSG00000064141|ZFP69
1241	ENSMUSG00000006095|TBCB
1242	ENSMUSG00000058581|GM5801
1243	ENSMUSG00000064767|SNORD35B
1244	ENSMUSG00000091989|GM17257
1245	ENSMUSG00000029477|MORN3
1246	ENSMUSG00000044912|SYT16
1247	ENSMUSG00000075012|FJX1
1248	ENSMUSG00000024430|CABYR
1249	ENSMUSG00000019370|CALM3
1250	ENSMUSG00000051851|CXX1C
1251	ENSMUSG00000041341|ATG2B
1252	ENSMUSG00000034042|GPBP1L1
1253	ENSMUSG00000048895|CDK5R1
1254	ENSMUSG00000031774|FAM192A
1255	ENSMUSG00000038502|PTOV1
1256	ENSMUSG00000054414|SLC30A7
1257	ENSMUSG00000024423|IMPACT
1258	ENSMUSG00000027997|CASP6
1259	ENSMUSG00000025571|TNRC6C
1260	ENSMUSG00000025269|APEX2
1261	ENSMUSG00000033685|UCP2
1262	ENSMUSG00000029587|ZFP12
1263	ENSMUSG00000038241|CEP250
1264	ENSMUSG00000041986|ELMOD1
1265	ENSMUSG00000066278|VPS37B
1266	ENSMUSG00000056458|STK30
1267	ENSMUSG00000082947|GM12587
1268	ENSMUSG00000043572|PARS2
1269	ENSMUSG00000020993|TRAPPC6B
1270	ENSMUSG00000068324|GM10029
1271	ENSMUSG00000075254|HEG1
1272	ENSMUSG00000003421|NOSIP
1273	ENSMUSG00000064363|MT-ND4
1274	ENSMUSG00000056919|4922501C03RIK
1275	ENSMUSG00000034994|EEF2
1276	ENSMUSG00000033543|GTF2A2
1277	ENSMUSG00000003380|RABAC1
1278	ENSMUSG00000054304|D130007C19RIK
1279	ENSMUSG00000057133|CHD6
1280	ENSMUSG00000025239|LIMD1
1281	ENSMUSG00000036620|MGAT4B
1282	ENSMUSG00000064344|MT-TM
1283	ENSMUSG00000062861|ZFP28
1284	ENSMUSG00000039615|STUB1
1285	ENSMUSG00000037443|CCDC21
1286	ENSMUSG00000091914|2010015M23RIK
1287	ENSMUSG00000057580|GM10012
1288	ENSMUSG00000057157|GM6054
1289	ENSMUSG00000003581|RNF215
1290	ENSMUSG00000026764|KIF5C
1291	ENSMUSG00000025427|RNF165
1292	ENSMUSG00000040549|CKAP5
1293	ENSMUSG00000030245|GOLT1B
1294	ENSMUSG00000093187|AC107641.3
1295	ENSMUSG00000058254|TSPAN7
1296	ENSMUSG00000055010|A830031A19RIK
1297	ENSMUSG00000045657|PCDHB10
1298	ENSMUSG00000009079|EWSR1
1299	ENSMUSG00000037814|LARP1B
1300	ENSMUSG00000024533|SPIRE1
1301	ENSMUSG00000047905|GM8566
1302	ENSMUSG00000039697|NCOA7
1303	ENSMUSG00000071262|ZFP957
1304	ENSMUSG00000006728|CDK4
1305	ENSMUSG00000027878|NOTCH2
1306	ENSMUSG00000044548|DACT1
1307	ENSMUSG00000026197|ZFAND2B
1308	ENSMUSG00000064369|MT-TE
1309	ENSMUSG00000078440|DOHH
1310	ENSMUSG00000027778|IFT80
1311	ENSMUSG00000000317|BCL6B
1312	ENSMUSG00000069070|GM10257
1313	ENSMUSG00000040478|PRDM13
1314	ENSMUSG00000004455|PPP1CC
1315	ENSMUSG00000037089|SLC35B2
1316	ENSMUSG00000020680|TAF15
1317	ENSMUSG00000058779|TOMM20
1318	ENSMUSG00000064372|MT-TP
1319	ENSMUSG00000027630|TBL1XR1
1320	ENSMUSG00000037860|AIM2
1321	ENSMUSG00000020014|4930485B16RIK
1322	ENSMUSG00000036030|PRTG
1323	ENSMUSG00000017421|ZFP207
1324	ENSMUSG00000034163|ZFC3H1
1325	ENSMUSG00000045136|TUBB2B
1326	ENSMUSG00000025001|HELLS
1327	ENSMUSG00000028857|TMEM222
1328	ENSMUSG00000048758|RPL29
1329	ENSMUSG00000019917|SEPT10
1330	ENSMUSG00000026840|LAMC3
1331	ENSMUSG00000076434|WFDC3
1332	ENSMUSG00000025237|PARP6
1333	ENSMUSG00000041997|TLK1
1334	ENSMUSG00000027365|TRPM7
1335	ENSMUSG00000022508|BCL6
1336	ENSMUSG00000036882|ARHGAP33
1337	ENSMUSG00000033918|PARL
1338	ENSMUSG00000028034|FUBP1
1339	ENSMUSG00000065589|MIR301
1340	ENSMUSG00000058019|CES5A
1341	ENSMUSG00000045694|GM4997
1342	ENSMUSG00000039765|CC2D2A
1343	ENSMUSG00000061244|EXOC5
1344	ENSMUSG00000088952|SNOU13
1345	ENSMUSG00000037447|ARID5A
1346	ENSMUSG00000090216|GM16549
1347	ENSMUSG00000078700|D030028A08RIK
1348	ENSMUSG00000037070|RBMXRT
1349	ENSMUSG00000020681|ACE
1350	ENSMUSG00000037885|STK35
1351	ENSMUSG00000048281|DLEU7
1352	ENSMUSG00000083086|GM15531
1353	ENSMUSG00000047166|TIGD5
1354	ENSMUSG00000020937|PLCD3
1355	ENSMUSG00000035585|TSEN34
1356	ENSMUSG00000081344|GM14303
1357	ENSMUSG00000053931|CNN3
1358	ENSMUSG00000022661|CD200
1359	ENSMUSG00000035168|TANC1
1360	ENSMUSG00000047888|TNRC6B
1361	ENSMUSG00000031673|CDH11
1362	ENSMUSG00000057706|MEX3B
1363	ENSMUSG00000006732|METTL1
1364	ENSMUSG00000063810|ALMS1
1365	ENSMUSG00000036834|PLCH1
1366	ENSMUSG00000074579|LEKR1
1367	ENSMUSG00000063488|ZFP167
1368	ENSMUSG00000031139|MCF2
1369	ENSMUSG00000062006|RPL34
1370	ENSMUSG00000016520|LNX2
1371	ENSMUSG00000026463|ATP2B4
1372	ENSMUSG00000074238|AP1AR
1373	ENSMUSG00000007080|POLE
1374	ENSMUSG00000021238|ALDH6A1
1375	ENSMUSG00000024647|CBLN2
1376	ENSMUSG00000037583|NR0B2
1377	ENSMUSG00000055436|SRSF11
1378	ENSMUSG00000085012|GM15492
1379	ENSMUSG00000022197|PDZD2
1380	ENSMUSG00000041859|MCM3
1381	ENSMUSG00000064125|BC068157
1382	ENSMUSG00000065808|7SK
1383	ENSMUSG00000003665|HAS1
1384	ENSMUSG00000066489|RPL26-PS2
1385	ENSMUSG00000020736|NT5C
1386	ENSMUSG00000079463|GM17682
1387	ENSMUSG00000092989|AL596108.1
1388	ENSMUSG00000028804|CSMD2
1389	ENSMUSG00000029780|NT5C3
1390	ENSMUSG00000014355|ANAPC1
1391	ENSMUSG00000055403|4933427D06RIK
1392	ENSMUSG00000022300|DCAF13
1393	ENSMUSG00000045312|LHFPL2
1394	ENSMUSG00000062014|GMFB
1395	ENSMUSG00000000346|DAZAP2
1396	ENSMUSG00000036873|2410004B18RIK
1397	ENSMUSG00000020032|NUAK1
1398	ENSMUSG00000087598|ZFP111
1399	ENSMUSG00000069302|HIST1H2AH
1400	ENSMUSG00000020738|SUMO2
1401	ENSMUSG00000013076|AMOTL1
1402	ENSMUSG00000007836|HNRNPA0
1403	ENSMUSG00000035559|MPV17L2
1404	ENSMUSG00000029095|ABLIM2
1405	ENSMUSG00000070425|TRPC2
1406	ENSMUSG00000040612|ILDR2
1407	ENSMUSG00000024588|FECH
1408	ENSMUSG00000072770|ACRBP
1409	ENSMUSG00000083921|GM15750
1410	ENSMUSG00000051008|4930412M03RIK
1411	ENSMUSG00000066368|4921517D21RIK
1412	ENSMUSG00000007591|TSSK4
1413	ENSMUSG00000080410|AC084287.1
1414	ENSMUSG00000087259|2610035D17RIK
1415	ENSMUSG00000025747|TYMS
1416	ENSMUSG00000041075|FZD7
1417	ENSMUSG00000071035|GM5499
1418	ENSMUSG00000078134|GM12355
1419	ENSMUSG00000029595|LHX5
1420	ENSMUSG00000034893|COG3
1421	ENSMUSG00000043372|HEXIM2
1422	ENSMUSG00000001467|CYP51
1423	ENSMUSG00000065518|MIR423
1424	ENSMUSG00000037896|RCOR1
1425	ENSMUSG00000032712|2810474O19RIK
1426	ENSMUSG00000036309|SKP1A
1427	ENSMUSG00000043311|D17H6S53E
1428	ENSMUSG00000027706|SEC62
1429	ENSMUSG00000021476|HABP4
1430	ENSMUSG00000027985|LEF1
1431	ENSMUSG00000031021|TMEM9B
1432	ENSMUSG00000061684|RPL21-PS8
1433	ENSMUSG00000058704|MEMO1
1434	ENSMUSG00000090870|GM17722
1435	ENSMUSG00000092374|GM6623
1436	ENSMUSG00000091537|CCDC72
1437	ENSMUSG00000037815|CTNNA1
1438	ENSMUSG00000083989|GM12607
1439	ENSMUSG00000087618|GM14114
1440	ENSMUSG00000081999|GM13461
1441	ENSMUSG00000056106|GM9990
1442	ENSMUSG00000060096|AMD-PS3
1443	ENSMUSG00000031285|DCX
1444	ENSMUSG00000072501|PHF20L1
1445	ENSMUSG00000048410|ZFP407
1446	ENSMUSG00000028452|VCP
1447	ENSMUSG00000057667|BLOC1S3
1448	ENSMUSG00000025224|GBF1
1449	ENSMUSG00000084010|GM13302
1450	ENSMUSG00000028936|RPL22
1451	ENSMUSG00000038305|SPATS2L
1452	ENSMUSG00000052613|PCDH15
1453	ENSMUSG00000055320|TEAD1
1454	ENSMUSG00000028145|THEM4
1455	ENSMUSG00000033352|MAP2K4
1456	ENSMUSG00000083219|GM11410
1457	ENSMUSG00000091528|GM9268
1458	ENSMUSG00000044952|KCTD21
1459	ENSMUSG00000049878|RLF
1460	ENSMUSG00000039126|PRUNE2
1461	ENSMUSG00000083392|GM6335
1462	ENSMUSG00000030283|ST8SIA1
1463	ENSMUSG00000005893|NR2C2
1464	ENSMUSG00000051339|2900026A02RIK
1465	ENSMUSG00000083912|GM5391
1466	ENSMUSG00000032386|TRIP4
1467	ENSMUSG00000025425|ST8SIA5
1468	ENSMUSG00000008348|UBC
1469	ENSMUSG00000017774|MYO1C
1470	ENSMUSG00000022114|SPRY2
1471	ENSMUSG00000026739|BMI1
1472	ENSMUSG00000015291|GDI1
1473	ENSMUSG00000033715|AKR1C14
1474	ENSMUSG00000044864|ANKRD50
1475	ENSMUSG00000005483|DNAJB1
1476	ENSMUSG00000026174|RQCD1
1477	ENSMUSG00000025006|SORBS1
1478	ENSMUSG00000031428|ZCCHC18
1479	ENSMUSG00000045180|SHROOM2
1480	ENSMUSG00000027799|NBEA
1481	ENSMUSG00000020015|CDK17
1482	ENSMUSG00000054280|C330019G07RIK
1483	ENSMUSG00000005161|PRDX2
1484	ENSMUSG00000034463|SCARA3
1485	ENSMUSG00000074825|ITPRIPL1
1486	ENSMUSG00000022309|ANGPT1
1487	ENSMUSG00000022507|1810013L24RIK
1488	ENSMUSG00000034832|TET3
1489	ENSMUSG00000080836|GM6444
1490	ENSMUSG00000040972|IGSF21
1491	ENSMUSG00000003847|NFAT5
1492	ENSMUSG00000024446|RPP21
1493	ENSMUSG00000032583|MON1A
1494	ENSMUSG00000060477|IRAK2
1495	ENSMUSG00000028447|DCTN3
1496	ENSMUSG00000040204|2810417H13RIK
1497	ENSMUSG00000064884|U6
1498	ENSMUSG00000025745|HADHA
1499	ENSMUSG00000064032|GM10143
1500	ENSMUSG00000087696|GM16957
1501	ENSMUSG00000030077|CHL1
1502	ENSMUSG00000046402|RBP1
1503	ENSMUSG00000018209|STK4
1504	ENSMUSG00000021090|LRRC9
1505	ENSMUSG00000062381|VPS28
1506	ENSMUSG00000037313|TACC3
1507	ENSMUSG00000034022|CPSF1
1508	ENSMUSG00000043323|FBRSL1
1509	ENSMUSG00000024841|EIF1AD
1510	ENSMUSG00000027942|4933434E20RIK
1511	ENSMUSG00000050382|KIF7
1512	ENSMUSG00000043419|A030009H04RIK
1513	ENSMUSG00000043889|GM8399
1514	ENSMUSG00000025404|R3HDM2
1515	ENSMUSG00000037426|DEPDC5
1516	ENSMUSG00000082401|GM14328
1517	ENSMUSG00000026594|RALGPS2
1518	ENSMUSG00000028020|GLRB
1519	ENSMUSG00000039634|ZFP189
1520	ENSMUSG00000046962|ZFP295
1521	ENSMUSG00000055044|PDLIM1
1522	ENSMUSG00000020721|HELZ
1523	ENSMUSG00000028284|MAP3K7
1524	ENSMUSG00000044447|DOCK5
1525	ENSMUSG00000026385|DBI
1526	ENSMUSG00000006763|SAAL1
1527	ENSMUSG00000058922|GM10052
1528	ENSMUSG00000026383|EPB4.1L5
1529	ENSMUSG00000045573|PENK
1530	ENSMUSG00000034292|TRAF3IP1
1531	ENSMUSG00000052369|TMEM106C
1532	ENSMUSG00000030752|JMJD5
1533	ENSMUSG00000081651|GM15530
1534	ENSMUSG00000025266|GNL3L
1535	ENSMUSG00000028417|TAL2
1536	ENSMUSG00000056708|IER5
1537	ENSMUSG00000069200|GM6132
1538	ENSMUSG00000026614|SLC30A10
1539	ENSMUSG00000083022|GM11968
1540	ENSMUSG00000033902|MAPKBP1
1541	ENSMUSG00000015568|LPL
1542	ENSMUSG00000000823|ZNF512B
1543	ENSMUSG00000006906|STAMBP
1544	ENSMUSG00000036613|TSSC1
1545	ENSMUSG00000021226|ACOT2
1546	ENSMUSG00000019777|HDAC2
1547	ENSMUSG00000070056|MFHAS1
1548	ENSMUSG00000002660|CLPP
1549	ENSMUSG00000049252|LRP1B
1550	ENSMUSG00000028692|AKR1A4
1551	ENSMUSG00000028780|SEMA3C
1552	ENSMUSG00000028789|ADC
1553	ENSMUSG00000043290|ZFP784
1554	ENSMUSG00000021244|YLPM1
1555	ENSMUSG00000043870|GM5809
1556	ENSMUSG00000080205|GM15526
1557	ENSMUSG00000018574|ACADVL
1558	ENSMUSG00000043542|FAM164A
1559	ENSMUSG00000084830|GM14539
1560	ENSMUSG00000083411|RPL30-PS10
1561	ENSMUSG00000074247|DDA1
1562	ENSMUSG00000091697|EIF3S6-PS2
1563	ENSMUSG00000077575|SNORA3
1564	ENSMUSG00000033953|PPP3R1
1565	ENSMUSG00000034311|KIF4
1566	ENSMUSG00000059772|SLX1B
1567	ENSMUSG00000022548|APOD
1568	ENSMUSG00000036502|FAM70A
1569	ENSMUSG00000032435|DYNC1LI1
1570	ENSMUSG00000085229|GM11672
1571	ENSMUSG00000026775|YME1L1
1572	ENSMUSG00000025287|ACOT9
1573	ENSMUSG00000031700|GPT2
1574	ENSMUSG00000025130|P4HB
1575	ENSMUSG00000058444|MAP2K5
1576	ENSMUSG00000001415|SMG5
1577	ENSMUSG00000090223|PCP4
1578	ENSMUSG00000017721|PIGT
1579	ENSMUSG00000056608|CHD9
1580	ENSMUSG00000027011|UBE2E3
1581	ENSMUSG00000002546|GOLGA2
1582	ENSMUSG00000003873|BAX
1583	ENSMUSG00000029695|AASS
1584	ENSMUSG00000022234|CCT5
1585	ENSMUSG00000021665|HEXB
1586	ENSMUSG00000033152|PODXL2
1587	ENSMUSG00000068876|CGN
1588	ENSMUSG00000043659|NPSR1
1589	ENSMUSG00000060206|ZFP462
1590	ENSMUSG00000063172|HSPB11
1591	ENSMUSG00000020219|TIMM13
1592	ENSMUSG00000024712|RFK
1593	ENSMUSG00000024750|ZFAND5
1594	ENSMUSG00000024660|INCENP
1595	ENSMUSG00000005198|POLR2A
1596	ENSMUSG00000028540|DPH2
1597	ENSMUSG00000071064|ZFP827
1598	ENSMUSG00000025410|DCTN2
1599	ENSMUSG00000029103|LRPAP1
1600	ENSMUSG00000059854|HYDIN
1601	ENSMUSG00000085607|GM16854
1602	ENSMUSG00000047613|A430005L14RIK
1603	ENSMUSG00000026209|DNPEP
1604	ENSMUSG00000058192|ZFP846
1605	ENSMUSG00000058318|PHF21A
1606	ENSMUSG00000082841|GM12994
1607	ENSMUSG00000030815|PHKG2
1608	ENSMUSG00000024378|STARD4
1609	ENSMUSG00000036707|CAB39
1610	ENSMUSG00000084383|GM13370
1611	ENSMUSG00000026787|GAD2
1612	ENSMUSG00000030087|KLF15
1613	ENSMUSG00000003190|BCL2L12
1614	ENSMUSG00000026761|ORC4
1615	ENSMUSG00000040249|LRP1
1616	ENSMUSG00000081136|GM12990
1617	ENSMUSG00000047766|LRRC49
1618	ENSMUSG00000073747|GM7534
1619	ENSMUSG00000044700|TMEM201
1620	ENSMUSG00000027016|ZFP385B
1621	ENSMUSG00000011171|VIPR2
1622	ENSMUSG00000039903|4931408A02RIK
1623	ENSMUSG00000026735|PTF1A
1624	ENSMUSG00000042496|PRDM10
1625	ENSMUSG00000019054|FIS1
1626	ENSMUSG00000028015|CTSO
1627	ENSMUSG00000081338|GM7618
1628	ENSMUSG00000021327|ZKSCAN3
1629	ENSMUSG00000026634|ANGEL2
1630	ENSMUSG00000002635|PDCD2L
1631	ENSMUSG00000041881|NDUFA7
1632	ENSMUSG00000020436|GABRG2
1633	ENSMUSG00000028684|UROD
1634	ENSMUSG00000027834|SERPINI1
1635	ENSMUSG00000020850|PRPF8
1636	ENSMUSG00000018417|MYO1B
1637	ENSMUSG00000060261|GTF2I
1638	ENSMUSG00000069793|SLFN9
1639	ENSMUSG00000078107|GM4478
1640	ENSMUSG00000036503|RNF13
1641	ENSMUSG00000036377|C530008M17RIK
1642	ENSMUSG00000027775|MFSD1
1643	ENSMUSG00000057531|DTNBP1
1644	ENSMUSG00000016477|E2F3
1645	ENSMUSG00000019210|ATP6V1E1
1646	ENSMUSG00000028587|ORC1
1647	ENSMUSG00000010554|METTL16
1648	ENSMUSG00000022897|DYRK1A
1649	ENSMUSG00000003746|MAN1A
1650	ENSMUSG00000037364|SRRT
1651	ENSMUSG00000091955|GM3788
1652	ENSMUSG00000064559|U6
1653	ENSMUSG00000015880|NCAPG
1654	ENSMUSG00000025283|SAT1
1655	ENSMUSG00000024335|BRD2
1656	ENSMUSG00000047767|ATG16L2
1657	ENSMUSG00000029657|HSPH1
1658	ENSMUSG00000020949|FKBP3
1659	ENSMUSG00000001521|TULP3
1660	ENSMUSG00000083379|GM4919
1661	ENSMUSG00000020660|POMC
1662	ENSMUSG00000027194|TTC17
1663	ENSMUSG00000010307|TMEM86A
1664	ENSMUSG00000008090|FGFRL1
1665	ENSMUSG00000031358|MSL3
1666	ENSMUSG00000090460|GM17511
1667	ENSMUSG00000031848|LSM4
1668	ENSMUSG00000057530|ECE1
1669	ENSMUSG00000063514|GM6756
1670	ENSMUSG00000031328|FLNA
1671	ENSMUSG00000015013|TRAPPC2L
1672	ENSMUSG00000028479|GNE
1673	ENSMUSG00000030313|DENND5B
1674	ENSMUSG00000039741|BAHCC1
1675	ENSMUSG00000020232|HMG20B
1676	ENSMUSG00000048874|PHF3
1677	ENSMUSG00000038902|POGZ
1678	ENSMUSG00000073414|AU023871
1679	ENSMUSG00000032113|CHEK1
1680	ENSMUSG00000036427|GPI1
1681	ENSMUSG00000062383|B130024G19RIK
1682	ENSMUSG00000044095|2410075B13RIK
1683	ENSMUSG00000031125|3830403N18RIK
1684	ENSMUSG00000017167|CNTNAP1
1685	ENSMUSG00000027670|4833422F24RIK
1686	ENSMUSG00000086363|A330102I10RIK
1687	ENSMUSG00000026150|MFF
1688	ENSMUSG00000021743|FEZF2
1689	ENSMUSG00000037188|GRHL3
1690	ENSMUSG00000081113|GM7308
1691	ENSMUSG00000035754|WDR18
1692	ENSMUSG00000020262|ADARB1
1693	ENSMUSG00000048076|ARF1
1694	ENSMUSG00000055670|ZZEF1
1695	ENSMUSG00000026814|ENG
1696	ENSMUSG00000035992|FNIP1
1697	ENSMUSG00000037214|THAP1
1698	ENSMUSG00000058301|UPF1
1699	ENSMUSG00000026869|PSMD5
1700	ENSMUSG00000038132|RBM24
1701	ENSMUSG00000073415|GM10501
1702	ENSMUSG00000043939|A530064D06RIK
1703	ENSMUSG00000015247|NIPSNAP3B
1704	ENSMUSG00000022634|YAF2
1705	ENSMUSG00000078772|GM12353
1706	ENSMUSG00000048644|CTXN1
1707	ENSMUSG00000006024|NAPA
1708	ENSMUSG00000026141|COL19A1
1709	ENSMUSG00000066809|GM10180
1710	ENSMUSG00000081255|GM5380
1711	ENSMUSG00000009630|PPP2CB
1712	ENSMUSG00000018983|E2F2
1713	ENSMUSG00000038518|JARID2
1714	ENSMUSG00000041215|YEATS2
1715	ENSMUSG00000056158|CAR10
1716	ENSMUSG00000028541|B4GALT2
1717	ENSMUSG00000029311|HSD17B11
1718	ENSMUSG00000020600|SLC7A15
1719	ENSMUSG00000039530|TUSC3
1720	ENSMUSG00000029059|2810405K02RIK
1721	ENSMUSG00000043241|UPF2
1722	ENSMUSG00000051675|TRIM32
1723	ENSMUSG00000066748|OLFR145
1724	ENSMUSG00000037795|N4BP2
1725	ENSMUSG00000052861|DNAHC6
1726	ENSMUSG00000074728|GM10748
1727	ENSMUSG00000036766|DNER
1728	ENSMUSG00000036123|SLC9A3
1729	ENSMUSG00000045007|TUBG2
1730	ENSMUSG00000039200|ATF7IP2
1731	ENSMUSG00000018707|DYNC1H1
1732	ENSMUSG00000085102|1700010K24RIK
1733	ENSMUSG00000078784|1810022K09RIK
1734	ENSMUSG00000070327|RNF213
1735	ENSMUSG00000039543|TTC18
1736	ENSMUSG00000037475|THOC2
1737	ENSMUSG00000042508|DMTF1
1738	ENSMUSG00000035551|IGFBPL1
1739	ENSMUSG00000044288|CNR1
1740	ENSMUSG00000023805|SYNJ2
1741	ENSMUSG00000056073|GRIK2
1742	ENSMUSG00000022996|WNT10B
1743	ENSMUSG00000038766|GABPB2
1744	ENSMUSG00000015316|SLAMF1
1745	ENSMUSG00000063275|PTPLA
1746	ENSMUSG00000030068|EIF4E3
1747	ENSMUSG00000087396|4933407K13RIK
1748	ENSMUSG00000027168|PAX6
1749	ENSMUSG00000061104|GM10094
1750	ENSMUSG00000031802|PHXR4
1751	ENSMUSG00000050876|FAM75D3
1752	ENSMUSG00000039994|TIMELESS
1753	ENSMUSG00000031210|GPR165
1754	ENSMUSG00000017677|WSB1
1755	ENSMUSG00000026799|MED27
1756	ENSMUSG00000034211|MRPS17
1757	ENSMUSG00000075232|AMD1
1758	ENSMUSG00000001062|1300018I17RIK
1759	ENSMUSG00000038914|DIDO1
1760	ENSMUSG00000020788|ATP2A3
1761	ENSMUSG00000053251|OLFR212
1762	ENSMUSG00000003559|AS3MT
1763	ENSMUSG00000025921|RDH10
1764	ENSMUSG00000082394|GM4596
1765	ENSMUSG00000029106|ADD1
1766	ENSMUSG00000059249|GM12350
1767	ENSMUSG00000022103|GFRA2
1768	ENSMUSG00000043673|KCNS3
1769	ENSMUSG00000092051|GM17229
1770	ENSMUSG00000029420|RIMBP2
1771	ENSMUSG00000063268|PARP10
1772	ENSMUSG00000087313|DLEU2
1773	ENSMUSG00000057098|EBF1
1774	ENSMUSG00000028582|CC2D1B
1775	ENSMUSG00000022257|LAPTM4B
1776	ENSMUSG00000091886|AW047730
1777	ENSMUSG00000053536|CSTF2T
1778	ENSMUSG00000009013|DYNLL1
1779	ENSMUSG00000045693|NLRP4E
1780	ENSMUSG00000043719|COL6A6
1781	ENSMUSG00000022945|CHAF1B
1782	ENSMUSG00000024188|LUC7L
1783	ENSMUSG00000052477|C130026I21RIK
1784	ENSMUSG00000024870|RAB1B
1785	ENSMUSG00000086865|GM16978
1786	ENSMUSG00000015053|GATA2
1787	ENSMUSG00000025557|SLC15A1
1788	ENSMUSG00000074788|5830416P10RIK
1789	ENSMUSG00000064600|SNORA13
1790	ENSMUSG00000087000|GM13395
1791	ENSMUSG00000032274|CYP19A1
1792	ENSMUSG00000071235|VRTN
1793	ENSMUSG00000054945|GM9958
1794	ENSMUSG00000017778|COX7C
1795	ENSMUSG00000027884|CLCC1
1796	ENSMUSG00000004709|CD244
1797	ENSMUSG00000070732|RBM44
1798	ENSMUSG00000006998|PSMD2
1799	ENSMUSG00000031207|MSN
1800	ENSMUSG00000066677|PYDC3
1801	ENSMUSG00000018776|AMAC1
1802	ENSMUSG00000044067|GPR22
1803	ENSMUSG00000026170|CYP27A1
1804	ENSMUSG00000027012|DYNC1I2
1805	ENSMUSG00000010290|AI597479
1806	ENSMUSG00000083851|GM12365
1807	ENSMUSG00000073775|KTI12
1808	ENSMUSG00000007850|HNRNPH1
1809	ENSMUSG00000050912|TMEM123
1810	ENSMUSG00000047193|DYNC2H1
1811	ENSMUSG00000047676|RPSA-PS10
1812	ENSMUSG00000005373|MLXIPL
1813	ENSMUSG00000055210|FOXD2
1814	ENSMUSG00000073198|GM10480
1815	ENSMUSG00000080893|GM15920
1816	ENSMUSG00000019146|CACNG2
1817	ENSMUSG00000038708|GOLGA4
1818	ENSMUSG00000030549|RHCG
1819	ENSMUSG00000019933|2310015B20RIK
1820	ENSMUSG00000081851|GM13323
1821	ENSMUSG00000042079|HNRNPF
1822	ENSMUSG00000005447|PAFAH1B3
1823	ENSMUSG00000092086|GM6793
1824	ENSMUSG00000091460|GM7808
1825	ENSMUSG00000076218|MIR692-1
1826	ENSMUSG00000020308|GM16517
1827	ENSMUSG00000058625|GM17383
1828	ENSMUSG00000041372|B4GALNT3
1829	ENSMUSG00000031530|DUSP4
1830	ENSMUSG00000085283|9530027J09RIK
1831	ENSMUSG00000030649|3200002M19RIK
1832	ENSMUSG00000031827|COTL1
1833	ENSMUSG00000027624|EPB4.1L1
1834	ENSMUSG00000072978|GM5830
1835	ENSMUSG00000041771|SLC24A4
1836	ENSMUSG00000024991|EIF3A
1837	ENSMUSG00000042594|SH2B3
1838	ENSMUSG00000026004|1110028C15RIK
1839	ENSMUSG00000044770|SCML4
1840	ENSMUSG00000043484|GM5867
1841	ENSMUSG00000030757|ZKSCAN2
1842	ENSMUSG00000025574|TK1
1843	ENSMUSG00000017176|NT5C3L
1844	ENSMUSG00000046432|NGFRAP1
1845	ENSMUSG00000027356|FERMT1
1846	ENSMUSG00000007950|ABHD8
1847	ENSMUSG00000040690|COL16A1
1848	ENSMUSG00000005262|UFD1L
1849	ENSMUSG00000028309|RNF20
1850	ENSMUSG00000047935|GM5607
1851	ENSMUSG00000078695|CISD3
1852	ENSMUSG00000082743|GM12988
1853	ENSMUSG00000000594|GM2A
1854	ENSMUSG00000049295|ZFP219
1855	ENSMUSG00000089792|GM16571
1856	ENSMUSG00000085364|GM16641
1857	ENSMUSG00000050490|GM8394
1858	ENSMUSG00000083016|GM11703
1859	ENSMUSG00000022698|NAA50
1860	ENSMUSG00000027694|GM8325
1861	ENSMUSG00000022191|DROSHA
1862	ENSMUSG00000020420|ZFP607
1863	ENSMUSG00000034533|SCN10A
1864	ENSMUSG00000015837|SQSTM1
1865	ENSMUSG00000044751|GM12231
1866	ENSMUSG00000071984|FNDC1
1867	ENSMUSG00000068115|NINL
1868	ENSMUSG00000021102|GLRX5
1869	ENSMUSG00000042613|PBXIP1
1870	ENSMUSG00000051255|GM6563
1871	ENSMUSG00000082655|GM7857
1872	ENSMUSG00000029439|SFSWAP
1873	ENSMUSG00000026069|IL1RL1
1874	ENSMUSG00000028071|SH2D2A
1875	ENSMUSG00000038453|SRCIN1
1876	ENSMUSG00000024966|STIP1
1877	ENSMUSG00000055639|DACH1
1878	ENSMUSG00000081051|GM15427
1879	ENSMUSG00000047248|C2CD3
1880	ENSMUSG00000069755|ZFP125
1881	ENSMUSG00000025537|PHKG1
1882	ENSMUSG00000092995|AC154660.1
1883	ENSMUSG00000010608|RBM25
1884	ENSMUSG00000024340|BTNL2
1885	ENSMUSG00000001128|CFP
1886	ENSMUSG00000033788|DYSF
1887	ENSMUSG00000021565|SLC6A19
1888	ENSMUSG00000027263|TUBGCP4
1889	ENSMUSG00000022995|ENAH
1890	ENSMUSG00000021486|PRELID1
1891	ENSMUSG00000078671|CHD2
1892	ENSMUSG00000070291|DDX43
1893	ENSMUSG00000053164|GPR21
1894	ENSMUSG00000074656|EIF2S2
1895	ENSMUSG00000060862|ZBTB40
1896	ENSMUSG00000051518|RPS19BP1
1897	ENSMUSG00000053935|ATF7IP
1898	ENSMUSG00000008859|RALA
1899	ENSMUSG00000021621|ZCCHC9
1900	ENSMUSG00000025969|NRP2
1901	ENSMUSG00000028648|NDUFS5
1902	ENSMUSG00000091793|RIAN
1903	ENSMUSG00000038280|OSTM1
1904	ENSMUSG00000022658|TAGLN3
1905	ENSMUSG00000047098|RNF31
1906	ENSMUSG00000065852|SNORA2
1907	ENSMUSG00000013593|NDUFS2
1908	ENSMUSG00000000628|HK2
1909	ENSMUSG00000031027|STK33
1910	ENSMUSG00000067038|RPS12-PS3
1911	ENSMUSG00000059834|SCLT1
1912	ENSMUSG00000060568|FAM78B
1913	ENSMUSG00000046314|STXBP6
1914	ENSMUSG00000085904|GM16881
1915	ENSMUSG00000083512|GM12749
1916	ENSMUSG00000032815|FANCA
1917	ENSMUSG00000027959|SASS6
1918	ENSMUSG00000026491|AHCTF1
1919	ENSMUSG00000039357|FUT11
1920	ENSMUSG00000025931|PAQR8
1921	ENSMUSG00000022817|ITGB5
1922	ENSMUSG00000024048|2900073G15RIK
1923	ENSMUSG00000037499|NENF
1924	ENSMUSG00000063882|UQCRH
1925	ENSMUSG00000021068|NIN
1926	ENSMUSG00000039178|TBC1D19
1927	ENSMUSG00000085024|C230035I16RIK
1928	ENSMUSG00000032598|NCKIPSD
1929	ENSMUSG00000034290|NEK9
1930	ENSMUSG00000078681|TM2D3
1931	ENSMUSG00000001150|MCM3AP
1932	ENSMUSG00000038572|BPIFB5
1933	ENSMUSG00000042700|SIPA1L1
1934	ENSMUSG00000055296|D730040F13RIK
1935	ENSMUSG00000025978|RFTN2
1936	ENSMUSG00000017740|SLC12A5
1937	ENSMUSG00000075304|SP5
1938	ENSMUSG00000090946|2010109K11RIK
1939	ENSMUSG00000060260|PWWP2B
1940	ENSMUSG00000030682|CDIPT
1941	ENSMUSG00000025544|TM9SF2
1942	ENSMUSG00000060301|2610008E11RIK
1943	ENSMUSG00000074563|GM10719
1944	ENSMUSG00000023852|CHD1
1945	ENSMUSG00000062683|ATP5G2
1946	ENSMUSG00000036264|FSTL4
1947	ENSMUSG00000037211|SPRY1
1948	ENSMUSG00000092081|GM17360
1949	ENSMUSG00000053580|TANC2
1950	ENSMUSG00000067995|GTF2F2
1951	ENSMUSG00000053646|PLXNB1
1952	ENSMUSG00000043633|4930412F15RIK
1953	ENSMUSG00000028549|ITGB3BP
1954	ENSMUSG00000068220|LGALS1
1955	ENSMUSG00000012422|TMEM167
1956	ENSMUSG00000021178|PSMC1
1957	ENSMUSG00000048371|PDP2
1958	ENSMUSG00000025612|BACH1
1959	ENSMUSG00000027469|TPX2
1960	ENSMUSG00000020018|SNRPF
1961	ENSMUSG00000080875|GM7332
1962	ENSMUSG00000025922|GM5045
1963	ENSMUSG00000032482|CSPG5
1964	ENSMUSG00000061518|COX5B
1965	ENSMUSG00000032607|AMT
1966	ENSMUSG00000056380|GPR50
1967	ENSMUSG00000053062|JAM2
1968	ENSMUSG00000024732|CCDC86
1969	ENSMUSG00000007908|HMGCLL1
1970	ENSMUSG00000055254|NTRK2
1971	ENSMUSG00000070047|FAT1
1972	ENSMUSG00000024026|GLO1
1973	ENSMUSG00000026492|TFB2M
1974	ENSMUSG00000036768|KIF15
1975	ENSMUSG00000020467|EFEMP1
1976	ENSMUSG00000053475|TNFAIP6
1977	ENSMUSG00000022095|FAM160B2
1978	ENSMUSG00000082062|FTL2
1979	ENSMUSG00000031273|COL4A6
1980	ENSMUSG00000092060|BEND4
1981	ENSMUSG00000036257|PNPLA8
1982	ENSMUSG00000086933|4933426K07RIK
1983	ENSMUSG00000031387|RENBP
1984	ENSMUSG00000029144|GTF3C2
1985	ENSMUSG00000064343|MT-TQ
1986	ENSMUSG00000052909|GM9894
1987	ENSMUSG00000025094|SLC18A2
1988	ENSMUSG00000051437|UBQLNL
1989	ENSMUSG00000015942|GTF2IRD2
1990	ENSMUSG00000075736|U1
1991	ENSMUSG00000024325|RING1
1992	ENSMUSG00000025393|ATP5B
1993	ENSMUSG00000027429|SEC23B
1994	ENSMUSG00000033423|ERI3
1995	ENSMUSG00000034320|SLC26A2
1996	ENSMUSG00000034931|DHX8
1997	ENSMUSG00000025036|SFXN2
1998	ENSMUSG00000063632|SOX11
1999	ENSMUSG00000020546|STXBP4
[truncated: 29,274 more rows]
