# Supplementary material for: Identification of cortical interneuron cell markers in mouse embryos based on machine learning analysis of single-cell transcriptomics
Source: Front Neurosci. 2022 Jul 15;16:841145. doi: 10.3389/fnins.2022.841145 (PMC9337837; doi:10.3389/fnins.2022.841145)
Supplement: Supplementary Table 2 — Performance of RF and RIPPER classifiers with different top features in the list. [file Table_2.XLSX]

## Sheet: RIPPER
Number of features	CGE	dMGE	vMGE	ACC	MCC
10	0.734813	0.547544	0.582944	0.618958	0.427214
20	0.800234	0.642633	0.579439	0.672911	0.509267
30	0.793224	0.638454	0.61215	0.679655	0.518822
40	0.787383	0.660397	0.607477	0.684151	0.526193
50	0.823598	0.631139	0.609813	0.686025	0.528257
60	0.809579	0.660397	0.616822	0.694268	0.540856
70	0.813084	0.635319	0.602804	0.681903	0.522117
80	0.821262	0.642633	0.595794	0.684901	0.526839
90	0.832944	0.656217	0.606308	0.69689	0.54487
100	0.831776	0.617555	0.616822	0.686025	0.528188
110	0.796729	0.624869	0.632009	0.682278	0.522453
120	0.836449	0.682341	0.606308	0.707381	0.561014
130	0.820093	0.628004	0.635514	0.692019	0.537242
140	0.832944	0.660397	0.599299	0.696141	0.544114
150	0.815421	0.636364	0.622664	0.689397	0.533374
160	0.821262	0.593521	0.593458	0.666542	0.498982
170	0.825935	0.628004	0.635514	0.693893	0.539972
180	0.807243	0.640543	0.617991	0.686774	0.529393
190	0.799065	0.633229	0.663551	0.696141	0.543292
200	0.829439	0.652038	0.620327	0.698764	0.547495
210	0.806075	0.634274	0.623832	0.686025	0.528102
220	0.821262	0.643678	0.617991	0.692394	0.537853
230	0.818925	0.629049	0.613318	0.684901	0.52657
240	0.810748	0.650993	0.621495	0.692769	0.538589
250	0.80257	0.643678	0.61215	0.684526	0.526058
260	0.829439	0.634274	0.634346	0.69689	0.544496
270	0.821262	0.623824	0.628505	0.688647	0.532076
280	0.818925	0.635319	0.661215	0.70251	0.55292
290	0.844626	0.624869	0.623832	0.695017	0.542033
300	0.811916	0.667712	0.63785	0.704384	0.556108
310	0.810748	0.650993	0.633178	0.696516	0.543978
320	0.806075	0.649948	0.623832	0.691645	0.536836
330	0.809579	0.635319	0.613318	0.684151	0.525362
340	0.799065	0.661442	0.625	0.693893	0.540173
350	0.795561	0.611285	0.634346	0.677782	0.515676
360	0.821262	0.621735	0.616822	0.684151	0.525484
370	0.813084	0.638454	0.621495	0.689022	0.53264
380	0.804907	0.62069	0.622664	0.680405	0.519645
390	0.834112	0.639498	0.61215	0.693143	0.539112
400	0.796729	0.634274	0.656542	0.693518	0.539359
410	0.800234	0.634274	0.627336	0.685275	0.526974
420	0.823598	0.640543	0.623832	0.693893	0.54027
430	0.780374	0.626959	0.634346	0.678531	0.516811
440	0.82243	0.646813	0.622664	0.695392	0.542415
450	0.804907	0.655172	0.63785	0.69764	0.545744
460	0.813084	0.644723	0.623832	0.692019	0.537418
470	0.799065	0.593521	0.639019	0.674035	0.510258
480	0.823598	0.638454	0.636682	0.697265	0.545144
490	0.82243	0.619645	0.64486	0.692769	0.538354
500	0.813084	0.673981	0.607477	0.697265	0.54572
510	0.818925	0.642633	0.650701	0.701761	0.551772
520	0.800234	0.647858	0.63785	0.693518	0.539462
530	0.80257	0.663532	0.625	0.695766	0.542998
540	0.818925	0.642633	0.61215	0.689397	0.533448
550	0.807243	0.621735	0.636682	0.686025	0.52811
560	0.813084	0.633229	0.628505	0.689397	0.53329
570	0.808411	0.638454	0.600467	0.680779	0.520456
580	0.818925	0.631139	0.648364	0.69689	0.544564
590	0.799065	0.675026	0.635514	0.702136	0.55277
600	0.807243	0.650993	0.615654	0.689771	0.53387
610	0.799065	0.675026	0.632009	0.701012	0.550941
620	0.816589	0.633229	0.595794	0.68003	0.519457
630	0.792056	0.62278	0.635514	0.681154	0.520733
640	0.799065	0.621735	0.616822	0.677033	0.51474
650	0.832944	0.626959	0.662383	0.704384	0.555872
660	0.820093	0.647858	0.639019	0.700262	0.549628
670	0.811916	0.658307	0.627336	0.69764	0.545766
680	0.808411	0.631139	0.643692	0.692019	0.537204
690	0.786215	0.629049	0.641355	0.683402	0.524142
700	0.804907	0.657262	0.620327	0.692769	0.538555
710	0.807243	0.656217	0.64486	0.701012	0.550661
720	0.799065	0.656217	0.622664	0.69127	0.536232
730	0.817757	0.62278	0.641355	0.69127	0.536065
740	0.816589	0.621735	0.620327	0.683777	0.524836
750	0.83528	0.648903	0.630841	0.702885	0.553906
760	0.797897	0.643678	0.623832	0.686774	0.529358
770	0.810748	0.630094	0.635514	0.689771	0.53381
780	0.816589	0.665622	0.595794	0.691645	0.537228
790	0.816589	0.635319	0.651869	0.698764	0.547445
800	0.810748	0.658307	0.606308	0.690521	0.53526
810	0.810748	0.657262	0.622664	0.695392	0.542399
820	0.809579	0.641588	0.628505	0.69127	0.536145
830	0.799065	0.626959	0.621495	0.680405	0.519667
840	0.797897	0.645768	0.616822	0.685275	0.527152
850	0.800234	0.658307	0.626168	0.693518	0.53965
860	0.830607	0.631139	0.602804	0.686025	0.528601
870	0.818925	0.655172	0.602804	0.690895	0.535772
880	0.799065	0.642633	0.623832	0.686774	0.529529
890	0.813084	0.642633	0.639019	0.696141	0.543558
900	0.804907	0.625914	0.622664	0.682278	0.522523
910	0.807243	0.664577	0.642523	0.70326	0.554191
920	0.830607	0.669801	0.619159	0.705133	0.557435
930	0.811916	0.662487	0.617991	0.696141	0.543571
940	0.817757	0.635319	0.620327	0.689022	0.532752
950	0.792056	0.652038	0.620327	0.686774	0.529428
960	0.816589	0.663532	0.649533	0.70813	0.561431
970	0.813084	0.652038	0.60514	0.688647	0.532373
980	0.803738	0.631139	0.613318	0.680779	0.520472
990	0.800234	0.653083	0.628505	0.692394	0.537821
1000	0.793224	0.658307	0.625	0.690895	0.535717
1010	0.817757	0.6186	0.609813	0.679655	0.518918
1020	0.800234	0.672936	0.649533	0.706257	0.55863
1030	0.816589	0.634274	0.621495	0.688647	0.532226
1040	0.813084	0.631139	0.630841	0.689397	0.533204
1050	0.828271	0.640543	0.653037	0.704758	0.556338
1060	0.808411	0.654127	0.625	0.694268	0.540622
1070	0.815421	0.646813	0.609813	0.689022	0.532899
1080	0.811916	0.661442	0.630841	0.699888	0.549143
1090	0.810748	0.631139	0.649533	0.694642	0.541116
1100	0.806075	0.6186	0.622664	0.68003	0.519146
1110	0.796729	0.628004	0.643692	0.687149	0.529761
1120	0.828271	0.649948	0.601636	0.691645	0.537262
1130	0.843458	0.589342	0.632009	0.684526	0.526689
1140	0.810748	0.635319	0.622664	0.687523	0.530491
1150	0.815421	0.60815	0.636682	0.683777	0.524974
1160	0.821262	0.603971	0.621495	0.679281	0.5182
1170	0.821262	0.656217	0.610981	0.694642	0.541346
1180	0.800234	0.61024	0.632009	0.678157	0.516244
1190	0.797897	0.628004	0.642523	0.687149	0.529848
1200	0.843458	0.598746	0.642523	0.69127	0.536535
1210	0.825935	0.625914	0.591121	0.678906	0.517612
1220	0.817757	0.647858	0.656542	0.705133	0.556963
1230	0.827103	0.662487	0.614486	0.699888	0.549206
1240	0.800234	0.634274	0.615654	0.681529	0.521448
1250	0.790888	0.611285	0.607477	0.667666	0.500442
1260	0.796729	0.626959	0.622664	0.68003	0.519107
1270	0.801402	0.649948	0.613318	0.686774	0.529464
1280	0.803738	0.660397	0.625	0.695017	0.541825
1290	0.814252	0.648903	0.616822	0.691645	0.536693
1300	0.808411	0.634274	0.61215	0.683027	0.523758
1310	0.834112	0.636364	0.641355	0.701386	0.551246
1320	0.792056	0.639498	0.660047	0.695017	0.541604
1330	0.800234	0.656217	0.613318	0.688647	0.532319
1340	0.837617	0.666667	0.616822	0.705508	0.557823
1350	0.813084	0.586207	0.626168	0.671787	0.506879
1360	0.830607	0.637409	0.625	0.695392	0.542344
1370	0.807243	0.626959	0.640187	0.689022	0.53261
1380	0.82243	0.626959	0.621495	0.687898	0.531058
1390	0.814252	0.643678	0.623832	0.692019	0.537292
1400	0.827103	0.61442	0.635514	0.689397	0.533451
1410	0.807243	0.660397	0.608645	0.690895	0.535798
1420	0.808411	0.640543	0.619159	0.687523	0.530493
1430	0.817757	0.648903	0.636682	0.699138	0.547915
1440	0.82243	0.624869	0.628505	0.689397	0.5333
1450	0.821262	0.636364	0.634346	0.695017	0.541712
1460	0.803738	0.606061	0.649533	0.683402	0.524309
1470	0.821262	0.633229	0.630841	0.692769	0.538244
1480	0.792056	0.638454	0.629673	0.684901	0.526551
1490	0.78972	0.61024	0.647196	0.679655	0.518675
1500	0.811916	0.639498	0.630841	0.692019	0.537245
1510	0.800234	0.603971	0.64486	0.68003	0.519406
1520	0.813084	0.593521	0.640187	0.678906	0.517672
1530	0.806075	0.623824	0.668224	0.696516	0.543994
1540	0.824766	0.650993	0.639019	0.702885	0.55348
1550	0.821262	0.591432	0.654206	0.685275	0.527688
1560	0.799065	0.61233	0.640187	0.681154	0.520756
1570	0.814252	0.630094	0.621495	0.686399	0.528739
1580	0.815421	0.644723	0.641355	0.698389	0.546697
1590	0.828271	0.638454	0.634346	0.698014	0.546325
1600	0.828271	0.590387	0.641355	0.683027	0.524331
1610	0.806075	0.62278	0.628505	0.683402	0.524226
1620	0.795561	0.635319	0.646028	0.690146	0.534287
1630	0.78972	0.632184	0.61215	0.676283	0.513454
1640	0.808411	0.638454	0.646028	0.695392	0.542316
1650	0.830607	0.652038	0.679907	0.718247	0.576688
1660	0.809579	0.598746	0.641355	0.68003	0.519296
1670	0.811916	0.61024	0.630841	0.681529	0.52144
1680	0.832944	0.605016	0.61215	0.680405	0.519977
1690	0.809579	0.61233	0.646028	0.686399	0.528739
1700	0.796729	0.602926	0.660047	0.683402	0.524374
1710	0.808411	0.623824	0.640187	0.688273	0.531534
1720	0.83528	0.637409	0.647196	0.704009	0.555679
1730	0.810748	0.628004	0.627336	0.686399	0.52873
1740	0.843458	0.630094	0.656542	0.707006	0.559979
1750	0.831776	0.619645	0.615654	0.686399	0.529026
1760	0.838785	0.633229	0.626168	0.69689	0.544915
1770	0.817757	0.630094	0.65771	0.699138	0.547951
1780	0.838785	0.632184	0.622664	0.695392	0.542515
1790	0.818925	0.638454	0.632009	0.694268	0.5407
1800	0.818925	0.619645	0.658879	0.696141	0.543542
1810	0.821262	0.650993	0.603972	0.690521	0.535096
1820	0.804907	0.6186	0.642523	0.686025	0.528196
1830	0.828271	0.609195	0.627336	0.685275	0.527585
1840	0.849299	0.587252	0.635514	0.686774	0.530083
1850	0.828271	0.621735	0.632009	0.69127	0.536014
1860	0.792056	0.631139	0.669393	0.695017	0.541718
1870	0.786215	0.609195	0.643692	0.677033	0.514718
1880	0.832944	0.61024	0.635514	0.689771	0.534213
1890	0.827103	0.648903	0.648364	0.705882	0.558205
1900	0.821262	0.630094	0.641355	0.695017	0.541739
1910	0.828271	0.657262	0.635514	0.705133	0.556897
1920	0.799065	0.647858	0.599299	0.680779	0.520379
1930	0.807243	0.638454	0.647196	0.695392	0.542271
1940	0.797897	0.635319	0.646028	0.690895	0.535395
1950	0.808411	0.579937	0.658879	0.678531	0.517504
1960	0.824766	0.599791	0.651869	0.688647	0.53258
1970	0.793224	0.634274	0.617991	0.68003	0.519095
1980	0.787383	0.624869	0.633178	0.679655	0.518496
1990	0.82243	0.646813	0.596963	0.687149	0.530205
2000	0.821262	0.640543	0.632009	0.695766	0.54291
2010	0.828271	0.646813	0.619159	0.696141	0.543902
2020	0.815421	0.601881	0.65771	0.688273	0.531843
2030	0.80257	0.644723	0.59229	0.678531	0.517162
2040	0.827103	0.637409	0.630841	0.696141	0.543521
2050	0.839953	0.6186	0.629673	0.693143	0.539375
2060	0.828271	0.61442	0.651869	0.695017	0.54173
2070	0.813084	0.595611	0.61215	0.670663	0.505285
2080	0.797897	0.609195	0.621495	0.673661	0.50957
2090	0.817757	0.657262	0.61215	0.694268	0.540852
2100	0.817757	0.597701	0.628505	0.678157	0.516582
2110	0.796729	0.635319	0.609813	0.678906	0.517438
2120	0.821262	0.628004	0.633178	0.691645	0.536785
2130	0.787383	0.621735	0.648364	0.683402	0.524161
2140	0.832944	0.605016	0.602804	0.677407	0.51545
2150	0.828271	0.62278	0.606308	0.683402	0.524688
2160	0.818925	0.635319	0.607477	0.685275	0.527203
2170	0.811916	0.623824	0.646028	0.69127	0.536233
2180	0.808411	0.605016	0.633178	0.679281	0.518137
2190	0.821262	0.611285	0.641355	0.688273	0.53195
2200	0.825935	0.637409	0.643692	0.699888	0.548973
2210	0.823598	0.585162	0.620327	0.672911	0.50878
2220	0.830607	0.613375	0.642523	0.692394	0.538155
2230	0.831776	0.611285	0.61215	0.682278	0.52299
2240	0.813084	0.597701	0.642523	0.681154	0.521281
2250	0.808411	0.624869	0.653037	0.692769	0.53829
2260	0.82243	0.592476	0.642523	0.682278	0.522896
2270	0.801402	0.625914	0.636682	0.68565	0.527627
2280	0.816589	0.617555	0.643692	0.689771	0.533852
2290	0.823598	0.601881	0.643692	0.686399	0.528945
2300	0.830607	0.597701	0.64486	0.687523	0.531013
2310	0.818925	0.60815	0.65771	0.691645	0.537176
2320	0.834112	0.606061	0.662383	0.697265	0.54574
2330	0.806075	0.639498	0.641355	0.693518	0.539378
2340	0.825935	0.615465	0.619159	0.684151	0.525642
2350	0.796729	0.623824	0.635514	0.683027	0.523581
2360	0.809579	0.621735	0.627336	0.683777	0.524845
2370	0.804907	0.596656	0.607477	0.666916	0.499721
2380	0.803738	0.624869	0.634346	0.685275	0.526965
2390	0.817757	0.61024	0.647196	0.688647	0.532254
2400	0.807243	0.606061	0.622664	0.675909	0.512935
2410	0.809579	0.61651	0.653037	0.690146	0.534469
2420	0.806075	0.638454	0.626168	0.688273	0.531511
2430	0.821262	0.641588	0.61215	0.689771	0.534072
2440	0.803738	0.626959	0.647196	0.690146	0.53441
2450	0.841121	0.632184	0.598131	0.688273	0.531953
2460	0.83528	0.615465	0.616822	0.686399	0.529187
2470	0.83528	0.600836	0.647196	0.690895	0.535965
2480	0.820093	0.605016	0.628505	0.681529	0.521775
2490	0.810748	0.615465	0.64486	0.687523	0.530435
2500	0.808411	0.609195	0.646028	0.684901	0.526735
2510	0.837617	0.638454	0.630841	0.699888	0.549146
2520	0.817757	0.594566	0.64486	0.682278	0.522699
2530	0.82243	0.643678	0.603972	0.688273	0.531744
2540	0.814252	0.638454	0.626168	0.690895	0.535531
2550	0.806075	0.599791	0.626168	0.67441	0.510867
2560	0.830607	0.623824	0.626168	0.690895	0.53557
2570	0.811916	0.609195	0.672897	0.694642	0.541269
2580	0.820093	0.644723	0.648364	0.702136	0.55243
2590	0.844626	0.584117	0.642523	0.686399	0.529898
2600	0.843458	0.561129	0.660047	0.683402	0.526177
2610	0.837617	0.543365	0.634346	0.666916	0.501778
2620	0.827103	0.537095	0.670561	0.672911	0.511018
2630	0.83528	0.494253	0.662383	0.65755	0.488695
2640	0.845794	0.539185	0.668224	0.678906	0.519908
2650	0.838785	0.545455	0.671729	0.68003	0.521469
2660	0.836449	0.567398	0.668224	0.686025	0.529772
2670	0.85514	0.566353	0.661215	0.689397	0.535721
2680	0.823598	0.553814	0.649533	0.671038	0.507142
2690	0.816589	0.54023	0.63785	0.660172	0.490937
2700	0.828271	0.570533	0.685748	0.690146	0.53618
2710	0.834112	0.522466	0.663551	0.667666	0.503025
2720	0.824766	0.54232	0.683411	0.678157	0.518844
2730	0.838785	0.527691	0.66472	0.671413	0.509156
2740	0.827103	0.560084	0.655374	0.676283	0.515032
2750	0.837617	0.552769	0.671729	0.682278	0.52452
2760	0.85514	0.520376	0.684579	0.680405	0.524003
2770	0.851636	0.549634	0.668224	0.684526	0.528224
2780	0.845794	0.556949	0.64486	0.677782	0.517193
2790	0.832944	0.537095	0.669393	0.67441	0.513427
2800	0.846963	0.559039	0.653037	0.681529	0.523186
2810	0.84229	0.553814	0.643692	0.675159	0.514303
2820	0.809579	0.53605	0.653037	0.661296	0.492974
2830	0.830607	0.582027	0.643692	0.681529	0.522518
2840	0.825935	0.527691	0.683411	0.673286	0.512041
2850	0.816589	0.595611	0.668224	0.689771	0.535004
2860	0.827103	0.530825	0.675234	0.672162	0.510321
2870	0.830607	0.599791	0.643692	0.687898	0.531684
2880	0.831776	0.54232	0.672897	0.677033	0.517274
2890	0.830607	0.54441	0.679907	0.679655	0.521189
2900	0.830607	0.548589	0.658879	0.67441	0.512623
2910	0.827103	0.568443	0.671729	0.684526	0.527427
2920	0.825935	0.525601	0.709112	0.680779	0.524671
2930	0.824766	0.563218	0.686916	0.686774	0.530848
2940	0.799065	0.600836	0.623832	0.671787	0.507103
2950	0.821262	0.541275	0.66472	0.670663	0.507429
2960	0.821262	0.563218	0.683411	0.684526	0.527967
2970	0.823598	0.53396	0.682243	0.67441	0.513133
2980	0.823598	0.548589	0.64486	0.667666	0.502026
2990	0.839953	0.578892	0.642523	0.683027	0.524988
3000	0.824766	0.523511	0.67757	0.669539	0.506203
3010	0.82243	0.54023	0.64486	0.664294	0.49766
3020	0.825935	0.518286	0.679907	0.66879	0.505461
3030	0.807243	0.560084	0.665888	0.673286	0.510444
3040	0.824766	0.557994	0.661215	0.676658	0.515795
3050	0.823598	0.546499	0.665888	0.673661	0.511969
3060	0.845794	0.527691	0.64486	0.667291	0.502962
3070	0.830607	0.578892	0.653037	0.683402	0.525267
3080	0.836449	0.54441	0.663551	0.676283	0.515754
3090	0.844626	0.557994	0.643692	0.677407	0.516771
3100	0.844626	0.551724	0.668224	0.683027	0.526304
3110	0.821262	0.523511	0.705607	0.677407	0.519079
3120	0.831776	0.481714	0.716121	0.669164	0.509262
3130	0.821262	0.556949	0.686916	0.683402	0.526713
3140	0.838785	0.556949	0.663551	0.681529	0.523639
3150	0.823598	0.543365	0.700935	0.683777	0.52795
3160	0.836449	0.509927	0.670561	0.666167	0.502323
3170	0.830607	0.573668	0.665888	0.68565	0.528646
3180	0.839953	0.54441	0.67757	0.681903	0.524663
3190	0.816589	0.575758	0.651869	0.677407	0.516731
3200	0.813084	0.549634	0.676402	0.674785	0.5136
3210	0.829439	0.568443	0.654206	0.679655	0.520036
3220	0.827103	0.563218	0.641355	0.672911	0.509776
3230	0.804907	0.577847	0.653037	0.674785	0.512107
3240	0.831776	0.561129	0.661215	0.68003	0.520995
3250	0.831776	0.506792	0.66472	0.661671	0.495299
3260	0.836449	0.550679	0.635514	0.669539	0.505072
3270	0.803738	0.565308	0.689252	0.681529	0.52279
3280	0.832944	0.548589	0.67757	0.681154	0.523536
3290	0.836449	0.592476	0.630841	0.683027	0.524781
3300	0.836449	0.561129	0.670561	0.684526	0.527701
3310	0.830607	0.573668	0.656542	0.682653	0.52442
3320	0.827103	0.526646	0.689252	0.675159	0.515195
3330	0.839953	0.570533	0.647196	0.681529	0.522967
3340	0.82243	0.535005	0.671729	0.671038	0.508319
3350	0.817757	0.560084	0.672897	0.678906	0.519583
3360	0.815421	0.527691	0.681075	0.669164	0.505736
3370	0.850467	0.54023	0.670561	0.681529	0.523974
3380	0.850467	0.553814	0.675234	0.687898	0.533323
3390	0.830607	0.573668	0.65771	0.683027	0.52494
3400	0.811916	0.547544	0.675234	0.673286	0.510894
3410	0.823598	0.554859	0.693925	0.68565	0.530498
3420	0.837617	0.526646	0.704439	0.683402	0.528355
3430	0.83528	0.526646	0.678738	0.67441	0.513841
3440	0.84229	0.54441	0.663551	0.678157	0.518968
3450	0.825935	0.583072	0.660047	0.68565	0.528607
3460	0.853972	0.553814	0.672897	0.688273	0.534277
3470	0.841121	0.556949	0.69743	0.693143	0.542002
3480	0.837617	0.570533	0.67757	0.690521	0.537299
3490	0.82243	0.518286	0.686916	0.669914	0.507356
3500	0.828271	0.556949	0.656542	0.675909	0.514914
3510	0.843458	0.54232	0.671729	0.680405	0.521955
3520	0.844626	0.537095	0.669393	0.678157	0.518727
3530	0.832944	0.559039	0.695093	0.690521	0.537645
3540	0.809579	0.591432	0.651869	0.680779	0.520946
3550	0.824766	0.587252	0.632009	0.677782	0.516729
3560	0.827103	0.555904	0.651869	0.673661	0.511216
3570	0.836449	0.54023	0.691589	0.683777	0.52813
3580	0.834112	0.573668	0.661215	0.685275	0.528656
3590	0.820093	0.595611	0.647196	0.684151	0.526191
3600	0.850467	0.560084	0.653037	0.683027	0.525646
3610	0.837617	0.592476	0.632009	0.683777	0.525421
3620	0.829439	0.576803	0.630841	0.675159	0.512825
3630	0.841121	0.569488	0.662383	0.686399	0.530053
3640	0.828271	0.535005	0.653037	0.666916	0.50154
3650	0.843458	0.561129	0.646028	0.678906	0.518806
3660	0.823598	0.551724	0.681075	0.680405	0.522067
3670	0.828271	0.559039	0.651869	0.675159	0.513291
3680	0.834112	0.567398	0.656542	0.681529	0.522937
3690	0.825935	0.557994	0.656542	0.675534	0.514687
3700	0.807243	0.557994	0.685748	0.678906	0.51917
3710	0.834112	0.572623	0.66472	0.686025	0.530058
3720	0.825935	0.539185	0.665888	0.671787	0.509292
3730	0.807243	0.566353	0.678738	0.679655	0.520237
3740	0.828271	0.582027	0.641355	0.68003	0.520395
3750	0.824766	0.557994	0.646028	0.671787	0.508389
3760	0.84229	0.585162	0.643692	0.686399	0.530354
3770	0.820093	0.507837	0.679907	0.66317	0.497492
3780	0.829439	0.582027	0.656542	0.685275	0.528011
3790	0.841121	0.552769	0.655374	0.678157	0.518724
3800	0.844626	0.526646	0.669393	0.67441	0.514026
3810	0.834112	0.567398	0.643692	0.677407	0.516928
3820	0.834112	0.532915	0.669393	0.673286	0.51205
3830	0.83528	0.53605	0.686916	0.680405	0.522785
3840	0.830607	0.545455	0.663551	0.674785	0.513893
3850	0.829439	0.552769	0.682243	0.683027	0.525675
3860	0.843458	0.593521	0.663551	0.696141	0.544811
3870	0.839953	0.502612	0.693925	0.672162	0.512907
3880	0.827103	0.564263	0.669393	0.682278	0.524245
3890	0.852804	0.570533	0.656542	0.688647	0.533763
3900	0.829439	0.54232	0.699766	0.684901	0.530177
3910	0.825935	0.574713	0.646028	0.678157	0.517782
3920	0.836449	0.499478	0.672897	0.66317	0.497521
3930	0.843458	0.543365	0.636682	0.669539	0.50548
3940	0.820093	0.552769	0.668224	0.675534	0.514195
3950	0.824766	0.537095	0.690421	0.678531	0.519791
3960	0.827103	0.552769	0.662383	0.675909	0.515016
3970	0.83528	0.535005	0.696262	0.683027	0.527399
3980	0.839953	0.518286	0.629673	0.657175	0.487781
3990	0.828271	0.557994	0.655374	0.675909	0.514747
4000	0.823598	0.546499	0.669393	0.674785	0.513831
4010	0.824766	0.570533	0.678738	0.686774	0.531576
4020	0.818925	0.494253	0.672897	0.655676	0.487294
4030	0.823598	0.546499	0.672897	0.675909	0.515357
4040	0.810748	0.519331	0.67757	0.663544	0.497654
4050	0.821262	0.547544	0.683411	0.678906	0.520796
4060	0.83528	0.525601	0.665888	0.669914	0.50775
4070	0.852804	0.551724	0.671729	0.686774	0.532327
4080	0.814252	0.493208	0.703271	0.663544	0.500054
4090	0.82243	0.528736	0.669393	0.66804	0.503872
4100	0.825935	0.513062	0.695093	0.671787	0.511546
4110	0.80257	0.518286	0.683411	0.66242	0.495624
4120	0.82243	0.492163	0.684579	0.659798	0.494467
4130	0.809579	0.527691	0.693925	0.671413	0.509772
4140	0.839953	0.525601	0.686916	0.678157	0.51972
4150	0.810748	0.512017	0.692757	0.665792	0.501977
4160	0.841121	0.485893	0.718458	0.67441	0.517535
4170	0.837617	0.525601	0.713785	0.686025	0.532465
4180	0.832944	0.525601	0.668224	0.669914	0.50717
4190	0.836449	0.53187	0.682243	0.677782	0.519444
4200	0.821262	0.547544	0.67757	0.677033	0.517122
4210	0.815421	0.492163	0.690421	0.659423	0.492988
4220	0.824766	0.530825	0.669393	0.669539	0.505978
4230	0.817757	0.525601	0.66472	0.663919	0.498036
4240	0.860981	0.507837	0.686916	0.678531	0.522834
4250	0.849299	0.54232	0.65771	0.677782	0.51822
4260	0.820093	0.521421	0.672897	0.665792	0.500946
4270	0.809579	0.561129	0.704439	0.686774	0.531684
4280	0.836449	0.505747	0.674065	0.665792	0.501772
4290	0.836449	0.53396	0.695093	0.682653	0.526756
4300	0.814252	0.53605	0.668224	0.667666	0.5032
4310	0.824766	0.54232	0.669393	0.673661	0.51215
4320	0.828271	0.567398	0.67757	0.686399	0.530489
4330	0.813084	0.489028	0.686916	0.656426	0.488171
4340	0.845794	0.524556	0.653037	0.66879	0.505362
4350	0.838785	0.508882	0.707944	0.678531	0.522084
4360	0.841121	0.543365	0.658879	0.675909	0.516183
4370	0.84229	0.503657	0.681075	0.669164	0.508521
4380	0.799065	0.54232	0.684579	0.670288	0.507387
4390	0.832944	0.551724	0.676402	0.681903	0.524179
4400	0.796729	0.504702	0.696262	0.659798	0.492405
4410	0.830607	0.517241	0.693925	0.67441	0.51445
4420	0.834112	0.535005	0.650701	0.66804	0.503474
4430	0.837617	0.529781	0.683411	0.677782	0.519164
4440	0.825935	0.503657	0.686916	0.665792	0.502262
4450	0.832944	0.484848	0.692757	0.66317	0.499423
4460	0.850467	0.502612	0.672897	0.66879	0.50749
4470	0.831776	0.551724	0.692757	0.686774	0.532039
4480	0.823598	0.486938	0.675234	0.655302	0.487456
4490	0.823598	0.54232	0.668224	0.672911	0.511186
4500	0.849299	0.514107	0.693925	0.679281	0.523234
4510	0.841121	0.53605	0.65771	0.672911	0.511881
4520	0.83528	0.510972	0.682243	0.669914	0.507792
4530	0.839953	0.452456	0.724299	0.663919	0.504308
4540	0.816589	0.545455	0.625	0.657924	0.487354
4550	0.851636	0.54232	0.65771	0.678531	0.519602
4560	0.84229	0.524556	0.662383	0.670663	0.508107
4570	0.82243	0.519331	0.646028	0.657175	0.487309
4580	0.830607	0.525601	0.681075	0.673286	0.512614
4590	0.815421	0.582027	0.636682	0.67441	0.511764
4600	0.825935	0.583072	0.642523	0.68003	0.520276
4610	0.787383	0.565308	0.684579	0.674785	0.513317
4620	0.821262	0.559039	0.691589	0.68565	0.529813
4630	0.827103	0.54441	0.667056	0.67441	0.513122
4640	0.825935	0.525601	0.700935	0.678157	0.520271
4650	0.831776	0.492163	0.688084	0.663919	0.499706
4660	0.814252	0.483804	0.665888	0.648183	0.475779
4670	0.818925	0.557994	0.684579	0.682278	0.524911
4680	0.818925	0.524556	0.667056	0.664668	0.49929
4690	0.828271	0.520376	0.720794	0.683402	0.529046
4700	0.823598	0.519331	0.682243	0.669164	0.506449
4710	0.823598	0.562173	0.641355	0.671413	0.507474
4720	0.817757	0.479624	0.719626	0.665043	0.502646
4730	0.827103	0.505747	0.662383	0.659048	0.491355
4740	0.838785	0.502612	0.688084	0.669914	0.509181
4750	0.813084	0.537095	0.627336	0.654552	0.482964
4760	0.814252	0.492163	0.75	0.678157	0.523399
4770	0.821262	0.512017	0.689252	0.66804	0.505679
4780	0.838785	0.522466	0.647196	0.663919	0.497767
4790	0.808411	0.530825	0.671729	0.665043	0.499182
4800	0.829439	0.539185	0.693925	0.681903	0.524938
4810	0.843458	0.547544	0.640187	0.672162	0.509271
4820	0.846963	0.527691	0.665888	0.67441	0.514587
4830	0.834112	0.562173	0.667056	0.683027	0.525596
4840	0.828271	0.561129	0.66472	0.68003	0.521097
4850	0.820093	0.545455	0.669393	0.673286	0.511077
4860	0.809579	0.528736	0.671729	0.664668	0.499473
4870	0.83528	0.497388	0.685748	0.666167	0.503119
4880	0.800234	0.520376	0.69743	0.666916	0.503281
4890	0.827103	0.509927	0.69743	0.671787	0.511525
4900	0.813084	0.500522	0.723131	0.672162	0.513491
4910	0.821262	0.520376	0.688084	0.670663	0.508528
4920	0.839953	0.514107	0.707944	0.680779	0.524936
4930	0.804907	0.522466	0.679907	0.663544	0.497995
4940	0.821262	0.585162	0.685748	0.693143	0.540482
4950	0.846963	0.529781	0.686916	0.681903	0.525443
4960	0.818925	0.521421	0.676402	0.666542	0.502469
4970	0.818925	0.515152	0.674065	0.663544	0.498015
4980	0.830607	0.482759	0.711449	0.667666	0.507294
4990	0.844626	0.494253	0.690421	0.669539	0.508858
5000	0.820093	0.500522	0.719626	0.673286	0.515686
5010	0.828271	0.53605	0.676402	0.674785	0.514768
5020	0.825935	0.539185	0.688084	0.678906	0.520767
5030	0.828271	0.564263	0.655374	0.678157	0.518081
5040	0.801402	0.519331	0.702103	0.668415	0.505695
5050	0.834112	0.545455	0.660047	0.674785	0.513528
5060	0.84229	0.500522	0.672897	0.665418	0.501504
5070	0.834112	0.532915	0.711449	0.686774	0.533338
5080	0.827103	0.518286	0.656542	0.661671	0.49435
5090	0.841121	0.556949	0.634346	0.672911	0.509949
5100	0.815421	0.54023	0.686916	0.675534	0.515322
5110	0.824766	0.554859	0.634346	0.666916	0.501467
5120	0.84229	0.529781	0.684579	0.679655	0.522296
5130	0.852804	0.564263	0.671729	0.69127	0.538924
5140	0.824766	0.54441	0.669393	0.67441	0.513298
5150	0.841121	0.548589	0.654206	0.676283	0.515904
5160	0.817757	0.477534	0.688084	0.654178	0.485312
5170	0.82243	0.53187	0.665888	0.66804	0.503618
5180	0.828271	0.54232	0.651869	0.669164	0.504842
5190	0.828271	0.53814	0.679907	0.676658	0.517171
5200	0.82243	0.53187	0.712617	0.683027	0.528005
5210	0.823598	0.541275	0.692757	0.680405	0.522863
5220	0.830607	0.486938	0.67757	0.658299	0.492295
5230	0.817757	0.532915	0.676402	0.670288	0.507014
5240	0.828271	0.563218	0.648364	0.675534	0.514466
5250	0.838785	0.535005	0.670561	0.675909	0.51553
5260	0.820093	0.545455	0.672897	0.67441	0.513211
5270	0.834112	0.53396	0.665888	0.672537	0.511349
5280	0.808411	0.489028	0.731308	0.669164	0.510481
5290	0.828271	0.484848	0.685748	0.659423	0.493566
5300	0.82243	0.54023	0.674065	0.673661	0.511681
5310	0.800234	0.516196	0.693925	0.664294	0.498825
5320	0.83528	0.527691	0.683411	0.676283	0.517617
5330	0.828271	0.53396	0.689252	0.678157	0.519892
5340	0.825935	0.595611	0.658879	0.689771	0.534535
5350	0.804907	0.559039	0.660047	0.670288	0.505489
5360	0.83528	0.529781	0.683411	0.677033	0.518196
5370	0.845794	0.537095	0.67757	0.681154	0.523999
5380	0.843458	0.535005	0.674065	0.678531	0.519647
5390	0.848131	0.504702	0.679907	0.671038	0.509792
5400	0.817757	0.571578	0.643692	0.673661	0.510781
5410	0.809579	0.498433	0.716121	0.66804	0.506376
5420	0.844626	0.522466	0.672897	0.674035	0.513838
5430	0.829439	0.556949	0.693925	0.688273	0.53391
5440	0.825935	0.504702	0.676402	0.662795	0.49782
5450	0.818925	0.497388	0.63785	0.64556	0.471897
5460	0.814252	0.53605	0.65771	0.664294	0.497739
5470	0.836449	0.53605	0.682243	0.679281	0.521567
5480	0.844626	0.53605	0.636682	0.667291	0.50283
5490	0.821262	0.508882	0.712617	0.67441	0.516484
5500	0.82243	0.528736	0.695093	0.676283	0.516588
5510	0.853972	0.504702	0.688084	0.675534	0.518108
5520	0.817757	0.549634	0.660047	0.671038	0.507628
5530	0.821262	0.526646	0.676402	0.669164	0.506354
5540	0.814252	0.541275	0.684579	0.674785	0.513497
5550	0.831776	0.513062	0.655374	0.660922	0.494003
5560	0.824766	0.485893	0.721963	0.670288	0.511832
5570	0.820093	0.491118	0.706776	0.665792	0.503526
5580	0.820093	0.529781	0.66472	0.666167	0.501168
5590	0.82243	0.512017	0.681075	0.665792	0.50217
5600	0.827103	0.568443	0.621495	0.668415	0.502365
5610	0.849299	0.483804	0.69743	0.669539	0.50953
5620	0.852804	0.483804	0.690421	0.668415	0.508596
5630	0.827103	0.528736	0.684579	0.67441	0.514516
5640	0.818925	0.515152	0.668224	0.661671	0.494515
5650	0.834112	0.483804	0.689252	0.662046	0.498197
5660	0.828271	0.492163	0.685748	0.662046	0.496818
5670	0.824766	0.521421	0.660047	0.66317	0.49672
5680	0.836449	0.520376	0.695093	0.677782	0.520409
5690	0.838785	0.551724	0.646028	0.674035	0.512135
5700	0.825935	0.491118	0.703271	0.666542	0.504923
5710	0.811916	0.563218	0.663551	0.675159	0.513631
5720	0.84229	0.513062	0.684579	0.673661	0.514339
5730	0.832944	0.524556	0.671729	0.670663	0.508479
5740	0.839953	0.53396	0.676402	0.677782	0.519066
5750	0.811916	0.537095	0.685748	0.672911	0.511208
5760	0.837617	0.570533	0.654206	0.683027	0.525342
5770	0.814252	0.514107	0.684579	0.665043	0.501011
5780	0.809579	0.499478	0.704439	0.664668	0.501076
5790	0.806075	0.519331	0.683411	0.663919	0.497614
5800	0.828271	0.479624	0.69743	0.661296	0.497455
5810	0.823598	0.545455	0.669393	0.67441	0.513091
5820	0.820093	0.555904	0.642523	0.668415	0.503465
5830	0.838785	0.477534	0.691589	0.662046	0.498453
5840	0.838785	0.495298	0.686916	0.666916	0.503948
5850	0.820093	0.54023	0.670561	0.671787	0.509889
5860	0.816589	0.527691	0.706776	0.677782	0.519901
5870	0.824766	0.514107	0.712617	0.677407	0.520096
5880	0.808411	0.512017	0.693925	0.665418	0.501277
5890	0.838785	0.504702	0.709112	0.677407	0.521595
5900	0.828271	0.557994	0.675234	0.682278	0.525278
5910	0.820093	0.503657	0.709112	0.671038	0.511272
5920	0.801402	0.490073	0.720794	0.663919	0.501502
5930	0.838785	0.517241	0.698598	0.678531	0.521146
5940	0.83528	0.559039	0.63785	0.672911	0.510308
5950	0.844626	0.45977	0.720794	0.666916	0.50768
5960	0.820093	0.535005	0.690421	0.676283	0.516328
5970	0.824766	0.513062	0.690421	0.669914	0.507967
5980	0.82243	0.504702	0.67757	0.662046	0.496401
5990	0.832944	0.568443	0.629673	0.672911	0.509769
6000	0.807243	0.53814	0.653037	0.661296	0.493577
6010	0.834112	0.519331	0.661215	0.665792	0.500825
6020	0.827103	0.514107	0.650701	0.658299	0.489675
6030	0.825935	0.554859	0.632009	0.666542	0.500488
6040	0.814252	0.530825	0.672897	0.667291	0.502554
6050	0.844626	0.541275	0.610981	0.660922	0.492751
6060	0.814252	0.515152	0.678738	0.663544	0.498006
6070	0.829439	0.543365	0.663551	0.673661	0.512359
6080	0.808411	0.573668	0.647196	0.672537	0.508882
6090	0.818925	0.525601	0.681075	0.669539	0.506639
6100	0.813084	0.504702	0.675234	0.658299	0.490902
6110	0.806075	0.515152	0.688084	0.663919	0.498376
6120	0.841121	0.572623	0.636682	0.679281	0.519315
6130	0.838785	0.528736	0.661215	0.670663	0.508236
6140	0.799065	0.541275	0.683411	0.669539	0.505757
6150	0.801402	0.53396	0.651869	0.65755	0.487557
6160	0.837617	0.520376	0.665888	0.66879	0.5058
6170	0.837617	0.53187	0.658879	0.670663	0.507762
6180	0.809579	0.560084	0.670561	0.675534	0.514261
6190	0.815421	0.518286	0.653037	0.6568	0.487067
6200	0.811916	0.575758	0.639019	0.671787	0.507961
6210	0.817757	0.524556	0.684579	0.669914	0.507401
6220	0.830607	0.513062	0.684579	0.669914	0.508236
6230	0.800234	0.524556	0.66472	0.657924	0.489103
6240	0.809579	0.561129	0.647196	0.668415	0.503062
6250	0.816589	0.550679	0.653037	0.66879	0.504572
6260	0.824766	0.562173	0.658879	0.677407	0.516516
6270	0.846963	0.570533	0.658879	0.687523	0.532273
6280	0.841121	0.514107	0.668224	0.668415	0.506004
6290	0.804907	0.53605	0.682243	0.669164	0.50572
6300	0.830607	0.560084	0.658879	0.678531	0.518898
6310	0.821262	0.564263	0.653037	0.675159	0.513223
6320	0.832944	0.537095	0.67757	0.677033	0.517872
6330	0.816589	0.525601	0.71028	0.678157	0.521208
6340	0.848131	0.552769	0.700935	0.695017	0.545071
6350	0.823598	0.580982	0.639019	0.677407	0.516176
6360	0.814252	0.549634	0.672897	0.674035	0.512362
6370	0.820093	0.520376	0.688084	0.670288	0.507896
6380	0.831776	0.518286	0.662383	0.665043	0.500615
6390	0.809579	0.539185	0.661215	0.665043	0.499184
6400	0.82243	0.518286	0.658879	0.660922	0.493875
6410	0.824766	0.547544	0.665888	0.67441	0.513148
6420	0.834112	0.526646	0.692757	0.678531	0.521086
6430	0.836449	0.508882	0.688084	0.671413	0.511095
6440	0.807243	0.535005	0.660047	0.66242	0.495099
6450	0.801402	0.53605	0.675234	0.665792	0.500405
6460	0.795561	0.548589	0.669393	0.666542	0.500867
6470	0.84229	0.554859	0.640187	0.67441	0.512251
6480	0.83528	0.576803	0.648364	0.682653	0.524255
6490	0.809579	0.524556	0.660047	0.659423	0.49076
6500	0.806075	0.523511	0.683411	0.665418	0.500548
6510	0.810748	0.513062	0.674065	0.660172	0.492983
6520	0.82243	0.564263	0.660047	0.677782	0.517245
6530	0.824766	0.493208	0.696262	0.664668	0.501386
6540	0.809579	0.550679	0.66472	0.670288	0.506765
6550	0.815421	0.525601	0.650701	0.658674	0.490124
6560	0.811916	0.492163	0.670561	0.65193	0.481363
6570	0.84229	0.506792	0.660047	0.663544	0.49832
6580	0.816589	0.596656	0.669393	0.690521	0.536107
6590	0.814252	0.519331	0.676402	0.664294	0.498999
6600	0.824766	0.54232	0.685748	0.678906	0.520647
6610	0.810748	0.487983	0.693925	0.65755	0.490256
6620	0.84229	0.548589	0.688084	0.687523	0.533143
6630	0.83528	0.505747	0.66472	0.66242	0.496745
6640	0.807243	0.550679	0.69743	0.68003	0.521683
6650	0.817757	0.515152	0.681075	0.665418	0.500959
6660	0.813084	0.54232	0.683411	0.67441	0.513291
6670	0.820093	0.563218	0.65771	0.675909	0.514211
6680	0.809579	0.528736	0.686916	0.669539	0.507147
6690	0.823598	0.523511	0.681075	0.670288	0.508066
6700	0.82243	0.520376	0.647196	0.657924	0.488652
6710	0.828271	0.551724	0.663551	0.676283	0.515486
6720	0.828271	0.503657	0.721963	0.677782	0.520978
6730	0.810748	0.521421	0.678738	0.664668	0.499621
6740	0.831776	0.513062	0.650701	0.659423	0.4916
6750	0.829439	0.494253	0.681075	0.661671	0.496821
6760	0.831776	0.529781	0.658879	0.66804	0.504593
6770	0.827103	0.525601	0.670561	0.66879	0.505101
6780	0.821262	0.520376	0.66472	0.66317	0.497426
6790	0.813084	0.555904	0.671729	0.675534	0.514256
6800	0.824766	0.546499	0.669393	0.675159	0.514148
6810	0.795561	0.516196	0.684579	0.659798	0.492002
6820	0.821262	0.555904	0.655374	0.672911	0.510723
6830	0.818925	0.53396	0.668224	0.668415	0.504208
6840	0.787383	0.507837	0.668224	0.648932	0.475484
6850	0.823598	0.503657	0.674065	0.660922	0.494681
6860	0.823598	0.517241	0.663551	0.66242	0.496631
6870	0.828271	0.486938	0.67757	0.65755	0.490534
6880	0.810748	0.550679	0.672897	0.673286	0.511485
6890	0.806075	0.526646	0.704439	0.673286	0.513209
6900	0.815421	0.527691	0.705607	0.677033	0.518627
6910	0.831776	0.528736	0.695093	0.679281	0.521971
6920	0.804907	0.535005	0.675234	0.666542	0.501153
6930	0.799065	0.486938	0.679907	0.648932	0.477381
6940	0.824766	0.555904	0.651869	0.672911	0.510731
6950	0.82243	0.517241	0.651869	0.658299	0.489572
6960	0.823598	0.598746	0.640187	0.684151	0.526377
6970	0.82243	0.508882	0.670561	0.661296	0.495087
6980	0.820093	0.573668	0.647196	0.676283	0.515124
6990	0.806075	0.499478	0.665888	0.65118	0.478845
7000	0.828271	0.519331	0.641355	0.65755	0.488704
7010	0.818925	0.481714	0.665888	0.648932	0.47719
7020	0.823598	0.53814	0.667056	0.671038	0.508332
7030	0.816589	0.543365	0.635514	0.660547	0.492026
7040	0.813084	0.524556	0.670561	0.663919	0.498133
7050	0.814252	0.54023	0.674065	0.671038	0.508207
7060	0.817757	0.537095	0.663551	0.667666	0.502949
7070	0.806075	0.520376	0.653037	0.654552	0.483397
7080	0.813084	0.523511	0.650701	0.657175	0.487468
7090	0.825935	0.532915	0.67757	0.673286	0.511789
7100	0.811916	0.546499	0.67757	0.673661	0.512327
7110	0.82243	0.570533	0.660047	0.68003	0.520746
7120	0.804907	0.508882	0.700935	0.665418	0.501177
7130	0.803738	0.506792	0.684579	0.659048	0.491189
7140	0.804907	0.53396	0.671729	0.665043	0.499533
7150	0.831776	0.555904	0.682243	0.684901	0.528853
7160	0.809579	0.512017	0.692757	0.665418	0.501337
7170	0.808411	0.498433	0.679907	0.656051	0.48756
7180	0.813084	0.578892	0.646028	0.675534	0.513108
7190	0.817757	0.552769	0.66472	0.673661	0.511356
7200	0.80257	0.505747	0.675234	0.655302	0.485782
7210	0.839953	0.563218	0.688084	0.692019	0.540031
7220	0.795561	0.599791	0.610981	0.666167	0.498537
7230	0.817757	0.470219	0.705607	0.657175	0.491748
7240	0.814252	0.555904	0.702103	0.68565	0.529947
7250	0.808411	0.576803	0.660047	0.677782	0.516814
7260	0.811916	0.532915	0.69743	0.675159	0.515514
7270	0.83528	0.53814	0.670561	0.675909	0.516354
7280	0.799065	0.490073	0.703271	0.65755	0.490037
7290	0.790888	0.510972	0.71028	0.664668	0.500721
7300	0.824766	0.575758	0.658879	0.682278	0.523932
7310	0.828271	0.53396	0.634346	0.660547	0.491658
7320	0.83528	0.549634	0.65771	0.675909	0.51496
7330	0.820093	0.515152	0.667056	0.661671	0.49533
7340	0.809579	0.554859	0.642523	0.664668	0.497671
7350	0.831776	0.54441	0.668224	0.676283	0.515855
7360	0.796729	0.537095	0.643692	0.654552	0.482519
7370	0.830607	0.54232	0.668224	0.675159	0.514854
7380	0.799065	0.560084	0.650701	0.665792	0.499379
7390	0.846963	0.520376	0.689252	0.679281	0.522505
7400	0.823598	0.562173	0.688084	0.686399	0.530865
7410	0.824766	0.556949	0.647196	0.671787	0.508515
7420	0.813084	0.53187	0.663551	0.664294	0.497768
7430	0.809579	0.502612	0.700935	0.664668	0.501001
7440	0.803738	0.596656	0.655374	0.681903	0.522615
7450	0.827103	0.507837	0.691589	0.669164	0.508208
7460	0.82243	0.539185	0.661215	0.669164	0.50554
7470	0.832944	0.547544	0.668224	0.677782	0.51785
7480	0.827103	0.503657	0.650701	0.654552	0.484438
7490	0.792056	0.527691	0.672897	0.659048	0.490503
7500	0.806075	0.523511	0.691589	0.66804	0.505516
7510	0.821262	0.554859	0.639019	0.667291	0.501549
7520	0.799065	0.527691	0.655374	0.655676	0.485195
7530	0.827103	0.564263	0.623832	0.667666	0.501869
7540	0.829439	0.556949	0.603972	0.659423	0.489608
7550	0.831776	0.549634	0.676402	0.680779	0.522718
7560	0.794393	0.527691	0.672897	0.659798	0.491841
7570	0.830607	0.515152	0.706776	0.677782	0.520454
7580	0.816589	0.564263	0.658879	0.675534	0.514096
7590	0.816589	0.495298	0.689252	0.660547	0.494413
7600	0.830607	0.523511	0.684579	0.673661	0.512967
7610	0.827103	0.503657	0.695093	0.66879	0.506924
7620	0.804907	0.566353	0.640187	0.666542	0.499799
7630	0.828271	0.532915	0.672897	0.672537	0.511369
7640	0.821262	0.525601	0.662383	0.664294	0.498187
7650	0.832944	0.560084	0.635514	0.671787	0.50842
7660	0.818925	0.54232	0.681075	0.675534	0.514885
7670	0.811916	0.546499	0.660047	0.66804	0.50331
7680	0.834112	0.570533	0.670561	0.687149	0.531648
7690	0.816589	0.543365	0.676402	0.673661	0.513004
7700	0.816589	0.555904	0.63785	0.665792	0.499109
7710	0.807243	0.526646	0.663551	0.660547	0.493295
7720	0.781542	0.535005	0.668224	0.6568	0.485857
7730	0.808411	0.529781	0.672897	0.665043	0.499401
7740	0.838785	0.504702	0.696262	0.673286	0.514038
7750	0.828271	0.552769	0.626168	0.664668	0.497781
7760	0.796729	0.551724	0.653037	0.662795	0.494806
7770	0.823598	0.541275	0.642523	0.664294	0.497229
7780	0.816589	0.53187	0.648364	0.660547	0.491527
7790	0.80257	0.521421	0.656542	0.654927	0.48426
7800	0.813084	0.526646	0.656542	0.660172	0.492221
7810	0.832944	0.490073	0.696262	0.666167	0.504372
7820	0.817757	0.515152	0.65771	0.657924	0.488928
7830	0.806075	0.560084	0.629673	0.661296	0.49219
7840	0.806075	0.546499	0.685748	0.67441	0.51325
7850	0.82243	0.557994	0.676402	0.680779	0.522301
7860	0.811916	0.522466	0.663551	0.660547	0.49269
7870	0.813084	0.54441	0.649533	0.664294	0.497525
7880	0.804907	0.527691	0.692757	0.669539	0.507137
7890	0.845794	0.541275	0.672897	0.681154	0.523978
7900	0.831776	0.493208	0.662383	0.656051	0.487977
7910	0.810748	0.510972	0.656542	0.653803	0.482951
7920	0.801402	0.54023	0.67757	0.66804	0.503755
7930	0.827103	0.505747	0.682243	0.665418	0.50137
7940	0.816589	0.521421	0.693925	0.671413	0.5099
7950	0.783879	0.577847	0.685748	0.678531	0.518041
7960	0.808411	0.561129	0.683411	0.679655	0.520862
7970	0.817757	0.518286	0.686916	0.668415	0.505758
7980	0.824766	0.554859	0.651869	0.672537	0.509419
7990	0.788551	0.526646	0.665888	0.655302	0.484433
8000	0.799065	0.510972	0.702103	0.664668	0.501183
8010	0.83528	0.541275	0.639019	0.666916	0.50166
8020	0.806075	0.546499	0.64486	0.661296	0.492817
8030	0.825935	0.557994	0.649533	0.673286	0.510823
8040	0.829439	0.489028	0.693925	0.663919	0.499876
8050	0.830607	0.563218	0.665888	0.681903	0.524452
8060	0.806075	0.529781	0.683411	0.667666	0.503436
8070	0.814252	0.487983	0.686916	0.656426	0.488766
8080	0.821262	0.520376	0.713785	0.678906	0.522817
8090	0.80257	0.547544	0.64486	0.660547	0.491781
8100	0.815421	0.53605	0.658879	0.665043	0.498969
8110	0.830607	0.54023	0.646028	0.667291	0.502253
8120	0.820093	0.529781	0.693925	0.675534	0.515724
8130	0.823598	0.513062	0.64486	0.654927	0.484249
8140	0.811916	0.526646	0.69743	0.672911	0.512157
8150	0.824766	0.515152	0.672897	0.665043	0.500538
8160	0.810748	0.503657	0.670561	0.655676	0.486898
8170	0.820093	0.495298	0.690421	0.662046	0.497118
8180	0.827103	0.53396	0.668224	0.671038	0.509161
8190	0.811916	0.518286	0.668224	0.660547	0.493037
8200	0.779206	0.526646	0.711449	0.666916	0.503405
8210	0.797897	0.504702	0.686916	0.657175	0.488793
8220	0.817757	0.532915	0.690421	0.674785	0.515297
8230	0.818925	0.549634	0.667056	0.673661	0.511692
8240	0.83528	0.543365	0.668224	0.677033	0.516674
8250	0.816589	0.515152	0.678738	0.664294	0.499188
8260	0.818925	0.513062	0.640187	0.65193	0.479633
8270	0.815421	0.54023	0.665888	0.66879	0.505023
8280	0.796729	0.573668	0.679907	0.679281	0.519202
8290	0.814252	0.529781	0.655374	0.661296	0.493355
8300	0.837617	0.54232	0.625	0.663544	0.496224
8310	0.813084	0.532915	0.661215	0.663919	0.49823
8320	0.829439	0.499478	0.649533	0.653428	0.483661
8330	0.816589	0.516196	0.698598	0.671038	0.509723
8340	0.795561	0.521421	0.704439	0.66804	0.505105
8350	0.796729	0.537095	0.660047	0.659798	0.490163
8360	0.820093	0.519331	0.671729	0.664668	0.500037
8370	0.824766	0.554859	0.651869	0.672537	0.509788
8380	0.820093	0.552769	0.689252	0.682278	0.525137
8390	0.832944	0.555904	0.651869	0.675534	0.514408
8400	0.799065	0.508882	0.709112	0.666167	0.502581
8410	0.837617	0.573668	0.661215	0.686399	0.530164
8420	0.817757	0.545455	0.668224	0.672162	0.509776
8430	0.832944	0.54441	0.653037	0.671787	0.509414
8440	0.793224	0.541275	0.691589	0.670288	0.507217
8450	0.799065	0.502612	0.700935	0.661296	0.49629
8460	0.827103	0.532915	0.702103	0.681529	0.525481
8470	0.816589	0.546499	0.630841	0.660172	0.491263
8480	0.799065	0.532915	0.679907	0.665418	0.500015
8490	0.843458	0.551724	0.64486	0.675159	0.514024
8500	0.834112	0.503657	0.662383	0.660547	0.494034
8510	0.821262	0.543365	0.651869	0.667291	0.501649
8520	0.815421	0.551724	0.669393	0.674035	0.51235
8530	0.817757	0.578892	0.641355	0.675534	0.513487
8540	0.807243	0.548589	0.654206	0.665418	0.49929
8550	0.837617	0.526646	0.640187	0.662795	0.496533
8560	0.796729	0.590387	0.654206	0.677033	0.515854
8570	0.832944	0.560084	0.64486	0.674785	0.512964
8580	0.817757	0.505747	0.689252	0.664668	0.500617
8590	0.824766	0.566353	0.660047	0.679281	0.519913
8600	0.792056	0.554859	0.682243	0.671787	0.509106
8610	0.82243	0.53605	0.648364	0.663919	0.497519
8620	0.807243	0.535005	0.686916	0.671038	0.509394
8630	0.82243	0.546499	0.674065	0.675909	0.515512
8640	0.810748	0.524556	0.682243	0.666916	0.503143
8650	0.82243	0.541275	0.675234	0.67441	0.51345
8660	0.831776	0.504702	0.653037	0.657175	0.48878
8670	0.829439	0.54232	0.674065	0.676658	0.516653
8680	0.810748	0.553814	0.642523	0.664668	0.497462
8690	0.806075	0.561129	0.670561	0.674785	0.512769
8700	0.801402	0.518286	0.688084	0.663544	0.498266
8710	0.797897	0.53605	0.667056	0.662046	0.494065
8720	0.817757	0.53187	0.661215	0.665043	0.499503
8730	0.821262	0.54232	0.663551	0.670663	0.507389
8740	0.800234	0.499478	0.695093	0.658674	0.491897
8750	0.810748	0.484848	0.698598	0.657924	0.491433
8760	0.82243	0.525601	0.665888	0.665792	0.500958
8770	0.827103	0.494253	0.670561	0.65755	0.489902
8780	0.804907	0.54441	0.674065	0.669539	0.505761
8790	0.820093	0.551724	0.641355	0.666542	0.500402
8800	0.814252	0.532915	0.681075	0.670663	0.507921
8810	0.816589	0.527691	0.684579	0.670663	0.508617
8820	0.806075	0.557994	0.672897	0.67441	0.51305
8830	0.816589	0.54232	0.649533	0.664668	0.497759
8840	0.828271	0.512017	0.689252	0.670288	0.508568
8850	0.813084	0.504702	0.704439	0.667666	0.506298
8860	0.80257	0.525601	0.707944	0.672911	0.512003
8870	0.816589	0.506792	0.690421	0.665043	0.500909
8880	0.815421	0.535005	0.639019	0.658299	0.488304
8890	0.820093	0.537095	0.683411	0.674785	0.514188
8900	0.808411	0.53396	0.683411	0.669914	0.506936
8910	0.796729	0.53814	0.682243	0.667291	0.502322
8920	0.795561	0.496343	0.662383	0.64556	0.470439
8930	0.825935	0.505747	0.674065	0.66242	0.496908
8940	0.825935	0.526646	0.650701	0.66242	0.495866
8950	0.813084	0.546499	0.668224	0.671038	0.507625
8960	0.806075	0.514107	0.671729	0.658299	0.49006
8970	0.82243	0.490073	0.690421	0.660922	0.495509
8980	0.80257	0.521421	0.655374	0.654552	0.483491
8990	0.820093	0.554859	0.660047	0.673661	0.511696
9000	0.828271	0.490073	0.693925	0.663919	0.500631
9010	0.815421	0.483804	0.682243	0.653803	0.485057
9020	0.818925	0.541275	0.685748	0.676658	0.517221
9030	0.83528	0.584117	0.656542	0.687898	0.532074
9040	0.803738	0.530825	0.690421	0.669539	0.506394
9050	0.80257	0.562173	0.641355	0.664668	0.49702
9060	0.820093	0.489028	0.656542	0.648932	0.476518
9070	0.818925	0.532915	0.676402	0.670663	0.508464
9080	0.817757	0.53396	0.64486	0.660547	0.491645
9090	0.808411	0.532915	0.670561	0.665418	0.499904
9100	0.823598	0.543365	0.650701	0.667666	0.503455
9110	0.834112	0.600836	0.676402	0.699888	0.550119
9120	0.816589	0.551724	0.665888	0.673286	0.511273
9130	0.792056	0.530825	0.734813	0.68003	0.52352
9140	0.799065	0.578892	0.617991	0.662046	0.492605
9150	0.808411	0.582027	0.672897	0.683777	0.526368
9160	0.796729	0.527691	0.662383	0.657175	0.487105
9170	0.823598	0.512017	0.681075	0.666167	0.502406
9180	0.830607	0.523511	0.646028	0.661296	0.493664
9190	0.827103	0.560084	0.650701	0.674785	0.513175
9200	0.792056	0.537095	0.683411	0.665792	0.500377
9210	0.800234	0.549634	0.634346	0.657175	0.485946
9220	0.813084	0.545455	0.630841	0.658674	0.488712
9230	0.825935	0.563218	0.640187	0.672162	0.508706
9240	0.801402	0.526646	0.660047	0.65755	0.487721
9250	0.817757	0.564263	0.654206	0.67441	0.51193
9260	0.814252	0.53605	0.71729	0.683402	0.528544
9270	0.814252	0.528736	0.679907	0.66879	0.505359
9280	0.821262	0.505747	0.660047	0.656426	0.487289
9290	0.815421	0.549634	0.641355	0.664294	0.49722
9300	0.804907	0.506792	0.671729	0.655302	0.48592
9310	0.816589	0.521421	0.658879	0.660172	0.49248
9320	0.828271	0.507837	0.640187	0.653054	0.481714
9330	0.811916	0.567398	0.655374	0.674035	0.511611
9340	0.804907	0.530825	0.65771	0.659423	0.491124
9350	0.807243	0.53396	0.69743	0.674035	0.513501
9360	0.801402	0.532915	0.689252	0.669164	0.506379
9370	0.823598	0.535005	0.650701	0.664668	0.49866
9380	0.804907	0.520376	0.674065	0.660922	0.493455
9390	0.818925	0.518286	0.661215	0.660547	0.493105
9400	0.811916	0.535005	0.684579	0.671787	0.509747
9410	0.849299	0.537095	0.693925	0.687523	0.534006
9420	0.834112	0.53814	0.700935	0.685275	0.530723
9430	0.800234	0.517241	0.67757	0.659423	0.491753
9440	0.831776	0.53187	0.639019	0.66242	0.495028
9450	0.797897	0.494253	0.703271	0.658674	0.491799
9460	0.810748	0.525601	0.665888	0.662046	0.495381
9470	0.803738	0.545455	0.685748	0.673286	0.511488
9480	0.808411	0.54232	0.676402	0.670663	0.508426
9490	0.810748	0.516196	0.651869	0.654178	0.483338
9500	0.83528	0.526646	0.682243	0.675534	0.516462
9510	0.849299	0.476489	0.688084	0.663919	0.501588
9520	0.828271	0.590387	0.616822	0.675159	0.512471
9530	0.801402	0.514107	0.676402	0.658299	0.489535
9540	0.820093	0.495298	0.651869	0.649682	0.476484
9550	0.806075	0.477534	0.704439	0.655676	0.488471
9560	0.801402	0.539185	0.692757	0.672537	0.510997
9570	0.804907	0.535005	0.685748	0.669914	0.507139
9580	0.828271	0.53814	0.654206	0.668415	0.50417
9590	0.809579	0.53605	0.66472	0.665043	0.499302
9600	0.814252	0.507837	0.658879	0.654552	0.484631
9610	0.807243	0.550679	0.672897	0.672162	0.509076
9620	0.816589	0.567398	0.655374	0.675534	0.513837
9630	0.813084	0.524556	0.66472	0.662046	0.494615
9640	0.813084	0.560084	0.633178	0.664668	0.497678
9650	0.816589	0.552769	0.642523	0.666167	0.500062
9660	0.836449	0.579937	0.653037	0.68565	0.528916
9670	0.831776	0.53187	0.634346	0.660922	0.492797
9680	0.811916	0.546499	0.669393	0.671038	0.507868
9690	0.824766	0.501567	0.65771	0.655302	0.486018
9700	0.808411	0.490073	0.668224	0.649307	0.476882
9710	0.831776	0.502612	0.671729	0.66242	0.497114
9720	0.817757	0.515152	0.714953	0.676283	0.518947
9730	0.807243	0.556949	0.688084	0.679281	0.519973
9740	0.824766	0.587252	0.620327	0.674035	0.510786
9750	0.816589	0.545455	0.650701	0.666167	0.500429
9760	0.815421	0.555904	0.641355	0.666542	0.500699
9770	0.831776	0.525601	0.69743	0.678906	0.521762
9780	0.834112	0.521421	0.681075	0.672911	0.512473
9790	0.824766	0.520376	0.668224	0.665418	0.500191
9800	0.813084	0.548589	0.676402	0.67441	0.513272
9810	0.80257	0.569488	0.663551	0.67441	0.512328
9820	0.837617	0.547544	0.63785	0.669539	0.5055
9830	0.824766	0.522466	0.665888	0.665418	0.499883
9840	0.828271	0.521421	0.654206	0.66242	0.495982
9850	0.817757	0.53605	0.676402	0.671413	0.508452
9860	0.83528	0.520376	0.672897	0.670288	0.508041
9870	0.811916	0.549634	0.650701	0.666167	0.500442
9880	0.852804	0.509927	0.682243	0.675159	0.516151
9890	0.834112	0.590387	0.64486	0.686025	0.529165
9900	0.801402	0.524556	0.709112	0.672537	0.512054
9910	0.792056	0.527691	0.700935	0.66804	0.504395
9920	0.808411	0.555904	0.66472	0.671787	0.508608
9930	0.804907	0.54023	0.670561	0.666916	0.502164
9940	0.815421	0.520376	0.66472	0.661296	0.493941
9950	0.821262	0.53187	0.660047	0.665792	0.500345
9960	0.834112	0.482759	0.633178	0.643687	0.468458
9970	0.800234	0.54023	0.681075	0.66879	0.504998
9980	0.841121	0.509927	0.658879	0.663919	0.499028
9990	0.816589	0.494253	0.703271	0.664668	0.501541
10000	0.824766	0.553814	0.629673	0.665043	0.498188
10010	0.811916	0.584117	0.622664	0.669539	0.504138
10020	0.807243	0.504702	0.71028	0.667666	0.505833
10030	0.814252	0.527691	0.691589	0.672162	0.510884
10040	0.801402	0.54023	0.654206	0.660547	0.49198
10050	0.800234	0.543365	0.655374	0.661671	0.493267
10060	0.810748	0.532915	0.676402	0.66804	0.503981
10070	0.809579	0.556949	0.63785	0.663919	0.496448
10080	0.827103	0.518286	0.649533	0.659423	0.490801
10090	0.828271	0.552769	0.66472	0.677033	0.516224
10100	0.809579	0.502612	0.661215	0.65193	0.480589
10110	0.814252	0.530825	0.690421	0.672911	0.511182
10120	0.827103	0.535005	0.691589	0.678906	0.521285
10130	0.813084	0.564263	0.65771	0.674035	0.511099
10140	0.800234	0.516196	0.686916	0.662046	0.49535
10150	0.825935	0.53396	0.65771	0.667291	0.503166
10160	0.820093	0.543365	0.662383	0.670288	0.506551
10170	0.817757	0.529781	0.683411	0.671413	0.509176
10180	0.80257	0.546499	0.654206	0.66317	0.495549
10190	0.808411	0.545455	0.648364	0.662795	0.495129
10200	0.816589	0.541275	0.651869	0.665043	0.49852
10210	0.814252	0.530825	0.667056	0.665418	0.499736
10220	0.829439	0.523511	0.686916	0.674035	0.514017
10230	0.843458	0.527691	0.682243	0.678531	0.521188
10240	0.804907	0.532915	0.681075	0.667666	0.503809
10250	0.820093	0.502612	0.692757	0.665418	0.501838
10260	0.793224	0.519331	0.671729	0.656051	0.485916
10270	0.829439	0.525601	0.674065	0.670663	0.508821
10280	0.796729	0.518286	0.683411	0.660547	0.493628
10290	0.799065	0.53187	0.678738	0.664668	0.498961
10300	0.846963	0.527691	0.674065	0.677033	0.518838
10310	0.83528	0.535005	0.639019	0.664668	0.49861
10320	0.820093	0.546499	0.676402	0.675909	0.515929
10330	0.806075	0.520376	0.672897	0.660922	0.493214
10340	0.807243	0.508882	0.671729	0.6568	0.487977
10350	0.818925	0.567398	0.647196	0.673661	0.510689
10360	0.84229	0.53396	0.648364	0.669539	0.506269
10370	0.794393	0.524556	0.663551	0.655676	0.484843
10380	0.823598	0.545455	0.663551	0.672537	0.510671
10390	0.828271	0.498433	0.669393	0.659048	0.49193
10400	0.832944	0.532915	0.656542	0.66879	0.504693
10410	0.825935	0.515152	0.705607	0.675909	0.517717
10420	0.816589	0.530825	0.672897	0.66804	0.504288
10430	0.818925	0.550679	0.654206	0.669914	0.505656
10440	0.814252	0.53605	0.675234	0.669914	0.506537
10450	0.804907	0.53814	0.654206	0.660922	0.492842
10460	0.803738	0.513062	0.675234	0.658299	0.489935
10470	0.821262	0.503657	0.668224	0.658299	0.490549
10480	0.816589	0.495298	0.676402	0.656426	0.488484
10490	0.824766	0.584117	0.628505	0.675534	0.513109
10500	0.801402	0.508882	0.650701	0.648183	0.474727
10510	0.795561	0.514107	0.712617	0.66804	0.506013
10520	0.80257	0.549634	0.655374	0.664668	0.497573
10530	0.792056	0.554859	0.671729	0.668415	0.503715
10540	0.794393	0.507837	0.665888	0.650431	0.477508
10550	0.811916	0.502612	0.695093	0.663544	0.49864
10560	0.827103	0.530825	0.675234	0.672162	0.510685
10570	0.818925	0.528736	0.684579	0.671787	0.510537
10580	0.820093	0.547544	0.630841	0.661671	0.493524
10590	0.808411	0.553814	0.654206	0.667666	0.501812
10600	0.814252	0.541275	0.668224	0.669539	0.506017
10610	0.834112	0.525601	0.684579	0.675534	0.516234
10620	0.808411	0.516196	0.668224	0.658674	0.490584
10630	0.806075	0.578892	0.626168	0.666916	0.500215
10640	0.813084	0.555904	0.661215	0.672162	0.508997
10650	0.836449	0.554859	0.667056	0.681154	0.523634
10660	0.807243	0.554859	0.650701	0.666542	0.500853
10670	0.827103	0.506792	0.678738	0.664668	0.499925
10680	0.839953	0.513062	0.665888	0.666916	0.503686
10690	0.821262	0.535005	0.674065	0.671413	0.508933
10700	0.820093	0.513062	0.681075	0.665418	0.501513
10710	0.821262	0.510972	0.66472	0.659798	0.492306
10720	0.851636	0.556949	0.672897	0.688647	0.535055
10730	0.829439	0.524556	0.655374	0.664294	0.498849
10740	0.792056	0.54023	0.675234	0.664294	0.49781
10750	0.821262	0.586207	0.667056	0.687523	0.531582
10760	0.815421	0.521421	0.660047	0.660172	0.491845
10770	0.821262	0.539185	0.661215	0.66879	0.505101
10780	0.817757	0.548589	0.647196	0.666542	0.500884
10790	0.813084	0.515152	0.693925	0.66804	0.504818
10800	0.814252	0.584117	0.643692	0.677033	0.51518
10810	0.816589	0.521421	0.678738	0.666542	0.502175
10820	0.809579	0.494253	0.670561	0.65193	0.480581
10830	0.843458	0.504702	0.650701	0.660172	0.49385
10840	0.823598	0.500522	0.679907	0.661671	0.496214
10850	0.820093	0.562173	0.627336	0.665792	0.49875
10860	0.83528	0.54023	0.629673	0.663544	0.496111
10870	0.823598	0.547544	0.671729	0.675909	0.5152
10880	0.797897	0.519331	0.679907	0.660172	0.492481
10890	0.801402	0.53814	0.662383	0.66242	0.494526
10900	0.811916	0.525601	0.668224	0.66317	0.496845
10910	0.823598	0.510972	0.704439	0.673286	0.514534
10920	0.815421	0.524556	0.651869	0.658674	0.489619
10930	0.808411	0.53396	0.678738	0.668415	0.504295
10940	0.813084	0.519331	0.640187	0.652304	0.480824
10950	0.817757	0.559039	0.653037	0.672162	0.509208
10960	0.794393	0.528736	0.646028	0.651555	0.478501
10970	0.823598	0.518286	0.683411	0.669164	0.50595
10980	0.808411	0.523511	0.651869	0.656051	0.486307
10990	0.820093	0.519331	0.674065	0.665418	0.500167
11000	0.806075	0.528736	0.655374	0.658299	0.489153
11010	0.830607	0.552769	0.668224	0.678906	0.519903
11020	0.824766	0.527691	0.641355	0.659423	0.490432
11030	0.82243	0.553814	0.66472	0.675534	0.514669
11040	0.816589	0.523511	0.656542	0.660172	0.492484
11050	0.824766	0.53187	0.678738	0.672911	0.511523
11060	0.825935	0.554859	0.672897	0.679655	0.520242
11070	0.811916	0.576803	0.648364	0.675159	0.513074
11080	0.797897	0.535005	0.67757	0.665043	0.498822
11090	0.817757	0.557994	0.655374	0.672537	0.509673
11100	0.821262	0.582027	0.623832	0.672162	0.508518
11110	0.795561	0.552769	0.66472	0.666542	0.500545
11120	0.811916	0.524556	0.676402	0.665418	0.50057
11130	0.828271	0.54441	0.689252	0.681903	0.524796
11140	0.814252	0.523511	0.686916	0.669164	0.506983
11150	0.83528	0.586207	0.633178	0.681154	0.521859
11160	0.804907	0.526646	0.641355	0.652679	0.48041
11170	0.808411	0.591432	0.648364	0.679281	0.518882
11180	0.800234	0.578892	0.685748	0.684151	0.526782
11190	0.795561	0.514107	0.705607	0.665792	0.502073
11200	0.792056	0.501567	0.667056	0.647808	0.473647
11210	0.82243	0.527691	0.692757	0.675159	0.515295
11220	0.843458	0.562173	0.660047	0.683777	0.526739
11230	0.827103	0.512017	0.675234	0.665418	0.501354
11240	0.832944	0.552769	0.655374	0.675534	0.514101
11250	0.834112	0.490073	0.663551	0.656051	0.487535
11260	0.82243	0.537095	0.669393	0.671038	0.508639
11270	0.786215	0.512017	0.702103	0.660922	0.494483
11280	0.795561	0.521421	0.682243	0.660922	0.493613
11290	0.836449	0.510972	0.692757	0.673661	0.513937
11300	0.779206	0.555904	0.641355	0.654927	0.482234
11310	0.823598	0.529781	0.649533	0.66242	0.495077
11320	0.821262	0.547544	0.679907	0.677782	0.518438
11330	0.807243	0.553814	0.640187	0.662795	0.494425
11340	0.792056	0.53396	0.671729	0.660922	0.492618
11350	0.817757	0.552769	0.668224	0.674785	0.513301
11360	0.846963	0.575758	0.634346	0.681529	0.522782
11370	0.804907	0.509927	0.670561	0.656051	0.48669
11380	0.817757	0.53814	0.634346	0.658674	0.488929
11390	0.824766	0.512017	0.669393	0.662795	0.496588
11400	0.817757	0.525601	0.682243	0.669539	0.507237
11410	0.821262	0.496343	0.672897	0.657175	0.489687
11420	0.809579	0.53814	0.675234	0.669164	0.505471
11430	0.828271	0.561129	0.65771	0.677782	0.517504
11440	0.82243	0.549634	0.66472	0.674035	0.511733
11450	0.809579	0.53814	0.672897	0.668415	0.504529
11460	0.803738	0.545455	0.702103	0.678531	0.520115
11470	0.800234	0.520376	0.686916	0.663544	0.497471
11480	0.817757	0.515152	0.663551	0.659798	0.492932
11490	0.796729	0.567398	0.640187	0.664294	0.496628
11500	0.796729	0.547544	0.698598	0.675909	0.515833
11510	0.824766	0.530825	0.661215	0.666916	0.502399
11520	0.788551	0.565308	0.646028	0.662795	0.494248
11530	0.797897	0.561129	0.661215	0.669164	0.504233
11540	0.814252	0.541275	0.668224	0.669539	0.506168
11550	0.816589	0.506792	0.683411	0.662795	0.497556
11560	0.836449	0.501567	0.692757	0.670288	0.51007
11570	0.834112	0.572623	0.655374	0.683027	0.524911
11580	0.837617	0.499478	0.649533	0.656051	0.4868
11590	0.824766	0.543365	0.593458	0.649682	0.474797
11600	0.801402	0.539185	0.648364	0.658299	0.488104
11610	0.824766	0.537095	0.671729	0.672537	0.511379
11620	0.796729	0.506792	0.688084	0.657924	0.489791
11630	0.823598	0.551724	0.64486	0.66879	0.503937
11640	0.825935	0.541275	0.654206	0.66879	0.504521
11650	0.806075	0.525601	0.676402	0.663919	0.498019
11660	0.83528	0.539185	0.669393	0.675909	0.515537
11670	0.814252	0.516196	0.683411	0.665418	0.500292
11680	0.793224	0.535005	0.654206	0.656051	0.485327
11690	0.830607	0.535005	0.640187	0.663544	0.496483
11700	0.816589	0.503657	0.702103	0.667666	0.505761
11710	0.823598	0.559039	0.609813	0.660172	0.490426
11720	0.803738	0.521421	0.700935	0.669539	0.507139
11730	0.82243	0.53187	0.676402	0.671413	0.509624
11740	0.830607	0.492163	0.685748	0.662795	0.498495
11750	0.844626	0.541275	0.642523	0.671038	0.508318
11760	0.807243	0.550679	0.66472	0.669539	0.505712
11770	0.84229	0.582027	0.641355	0.684526	0.527307
11780	0.808411	0.547544	0.648364	0.663544	0.495544
11790	0.821262	0.518286	0.689252	0.670288	0.508096
11800	0.836449	0.484848	0.676402	0.659048	0.492768
11810	0.804907	0.565308	0.660047	0.672537	0.509443
11820	0.810748	0.546499	0.635514	0.659798	0.490559
11830	0.800234	0.545455	0.675234	0.66879	0.504534
11840	0.804907	0.530825	0.65771	0.659423	0.490109
11850	0.816589	0.494253	0.660047	0.650806	0.479692
11860	0.806075	0.554859	0.625	0.657924	0.486996
11870	0.82243	0.541275	0.622664	0.65755	0.487249
11880	0.80257	0.53187	0.66472	0.661296	0.493495
11890	0.818925	0.551724	0.670561	0.675534	0.514655
11900	0.832944	0.532915	0.668224	0.672537	0.510636
11910	0.796729	0.530825	0.651869	0.654927	0.483094
11920	0.78972	0.553814	0.660047	0.663544	0.496224
11930	0.832944	0.547544	0.650701	0.672162	0.50946
11940	0.808411	0.571578	0.621495	0.663544	0.495324
11950	0.815421	0.541275	0.655374	0.665792	0.499805
11960	0.83528	0.541275	0.646028	0.669164	0.505078
11970	0.814252	0.516196	0.663551	0.659048	0.49035
11980	0.821262	0.514107	0.685748	0.667666	0.50449
11990	0.824766	0.549634	0.681075	0.68003	0.521359
12000	0.82243	0.513062	0.685748	0.667666	0.504836
12010	0.838785	0.521421	0.668224	0.670288	0.508056
12020	0.824766	0.512017	0.693925	0.670663	0.509874
12030	0.811916	0.555904	0.656542	0.670288	0.50592
12040	0.820093	0.572623	0.614486	0.665418	0.497796
12050	0.810748	0.550679	0.674065	0.673661	0.511568
12060	0.816589	0.541275	0.669393	0.670663	0.507412
12070	0.807243	0.530825	0.693925	0.671787	0.509979
12080	0.84229	0.563218	0.636682	0.676283	0.515325
12090	0.838785	0.507837	0.66472	0.664294	0.498763
12100	0.809579	0.507837	0.692757	0.663919	0.499362
12110	0.838785	0.575758	0.609813	0.671038	0.506746
12120	0.810748	0.519331	0.679907	0.664294	0.498573
12130	0.827103	0.520376	0.685748	0.671787	0.510343
12140	0.814252	0.528736	0.649533	0.659048	0.490142
12150	0.809579	0.54023	0.709112	0.680779	0.523761
12160	0.827103	0.537095	0.663551	0.670663	0.507368
12170	0.806075	0.517241	0.698598	0.66804	0.505894
12180	0.830607	0.525601	0.679907	0.672911	0.511677
12190	0.820093	0.598746	0.634346	0.681154	0.521365
12200	0.815421	0.518286	0.660047	0.659048	0.490171
12210	0.814252	0.530825	0.647196	0.659048	0.489946
12220	0.807243	0.552769	0.699766	0.681529	0.523984
12230	0.807243	0.498433	0.683411	0.6568	0.488762
12240	0.831776	0.523511	0.67757	0.671787	0.510202
12250	0.803738	0.515152	0.685748	0.66242	0.496512
12260	0.793224	0.539185	0.712617	0.676283	0.517138
12270	0.830607	0.507837	0.662383	0.660922	0.494981
12280	0.821262	0.54232	0.663551	0.670663	0.506788
12290	0.824766	0.547544	0.648364	0.66879	0.504069
12300	0.821262	0.509927	0.665888	0.659798	0.492906
12310	0.811916	0.505747	0.699766	0.666167	0.502638
12320	0.810748	0.515152	0.704439	0.670663	0.509457
12330	0.838785	0.571578	0.647196	0.681529	0.522974
12340	0.803738	0.520376	0.661215	0.656426	0.487019
12350	0.815421	0.547544	0.65771	0.66879	0.504217
12360	0.804907	0.516196	0.691589	0.665043	0.499964
12370	0.82243	0.53396	0.667056	0.669164	0.505485
12380	0.821262	0.559039	0.653037	0.673286	0.510659
12390	0.800234	0.555904	0.65771	0.666916	0.501015
12400	0.829439	0.495298	0.705607	0.669914	0.510151
12410	0.824766	0.532915	0.646028	0.662795	0.495674
12420	0.817757	0.507837	0.685748	0.664294	0.499869
12430	0.799065	0.539185	0.679907	0.667666	0.502866
12440	0.808411	0.53814	0.679907	0.670288	0.508321
12450	0.811916	0.575758	0.643692	0.673286	0.509791
12460	0.850467	0.547544	0.665888	0.682653	0.526337
12470	0.810748	0.575758	0.641355	0.672162	0.508457
12480	0.816589	0.546499	0.655374	0.66804	0.503335
12490	0.797897	0.53187	0.709112	0.674035	0.513816
12500	0.829439	0.535005	0.648364	0.665792	0.500269
12510	0.808411	0.529781	0.686916	0.669539	0.506547
12520	0.810748	0.515152	0.651869	0.653803	0.482874
12530	0.810748	0.517241	0.651869	0.654552	0.484194
12540	0.804907	0.561129	0.646028	0.666542	0.500317
12550	0.78972	0.518286	0.704439	0.665043	0.501217
12560	0.793224	0.574713	0.663551	0.673286	0.510359
12570	0.809579	0.522466	0.691589	0.66879	0.505432
12580	0.820093	0.54441	0.679907	0.676283	0.516327
12590	0.837617	0.547544	0.654206	0.674785	0.513306
12600	0.818925	0.574713	0.632009	0.671413	0.507354
12610	0.792056	0.526646	0.669393	0.65755	0.48834
12620	0.808411	0.527691	0.670561	0.663544	0.497078
12630	0.808411	0.529781	0.660047	0.660922	0.493016
12640	0.818925	0.563218	0.669393	0.679281	0.519585
12650	0.823598	0.553814	0.669393	0.677407	0.517406
12660	0.800234	0.522466	0.672897	0.659798	0.491838
12670	0.827103	0.547544	0.654206	0.671413	0.508538
12680	0.78972	0.490073	0.668224	0.643312	0.467466
12690	0.814252	0.547544	0.685748	0.677407	0.518093
12700	0.82243	0.529781	0.646028	0.660922	0.492877
12710	0.790888	0.497388	0.672897	0.647808	0.475095
12720	0.824766	0.552769	0.655374	0.672911	0.51058
12730	0.796729	0.568443	0.676402	0.676283	0.515044
12740	0.82243	0.567398	0.620327	0.666167	0.499453
12750	0.813084	0.559039	0.621495	0.660547	0.490701
12760	0.823598	0.539185	0.672897	0.673286	0.511601
12770	0.790888	0.507837	0.658879	0.647059	0.473201
12780	0.813084	0.541275	0.641355	0.660547	0.491525
12790	0.813084	0.490073	0.702103	0.661671	0.49711
12800	0.809579	0.543365	0.663551	0.667291	0.502874
12810	0.825935	0.504702	0.707944	0.672911	0.513799
12820	0.813084	0.518286	0.671729	0.662046	0.495569
12830	0.804907	0.564263	0.676402	0.677407	0.517495
12840	0.82243	0.521421	0.63785	0.655302	0.484576
12850	0.815421	0.549634	0.648364	0.666542	0.500667
12860	0.809579	0.559039	0.668224	0.67441	0.512499
12870	0.823598	0.520376	0.635514	0.654552	0.483511
12880	0.80257	0.573668	0.635514	0.666916	0.500398
12890	0.837617	0.512017	0.684579	0.671787	0.511125
12900	0.834112	0.53814	0.656542	0.671038	0.508991
12910	0.80257	0.554859	0.626168	0.657175	0.485829
12920	0.841121	0.539185	0.661215	0.675159	0.51483
12930	0.816589	0.523511	0.656542	0.660172	0.492314
12940	0.799065	0.562173	0.681075	0.676283	0.515459
12950	0.824766	0.573668	0.643692	0.676658	0.515171
12960	0.829439	0.541275	0.667056	0.674035	0.512856
12970	0.82243	0.532915	0.650701	0.663544	0.496425
12980	0.817757	0.521421	0.703271	0.674785	0.51543
12990	0.818925	0.520376	0.681075	0.667666	0.504038
13000	0.83528	0.532915	0.64486	0.665792	0.500714
13010	0.846963	0.525601	0.649533	0.668415	0.504982
13020	0.82243	0.497388	0.669393	0.6568	0.488946
13030	0.846963	0.493208	0.685748	0.668415	0.507654
13040	0.800234	0.543365	0.668224	0.665792	0.500272
13050	0.814252	0.522466	0.681075	0.666916	0.503002
13060	0.790888	0.525601	0.679907	0.660172	0.492223
13070	0.809579	0.597701	0.646028	0.681154	0.521337
13080	0.810748	0.583072	0.620327	0.66804	0.50175
13090	0.827103	0.571578	0.640187	0.675534	0.513739
13100	0.810748	0.528736	0.681075	0.66804	0.504704
13110	0.818925	0.566353	0.625	0.666167	0.499546
13120	0.795561	0.53605	0.679907	0.665418	0.499956
13130	0.820093	0.483804	0.676402	0.653428	0.484552
13140	0.811916	0.522466	0.653037	0.657175	0.487265
13150	0.841121	0.545455	0.623832	0.665418	0.49902
13160	0.832944	0.580982	0.621495	0.674785	0.512384
13170	0.825935	0.510972	0.690421	0.669539	0.508012
13180	0.80257	0.556949	0.646028	0.664294	0.496857
13190	0.814252	0.521421	0.671729	0.663544	0.497768
13200	0.803738	0.550679	0.632009	0.657924	0.487727
13210	0.809579	0.539185	0.63785	0.65755	0.487332
13220	0.818925	0.505747	0.703271	0.669539	0.50869
13230	0.809579	0.557994	0.647196	0.667291	0.501047
13240	0.818925	0.54441	0.670561	0.672911	0.511361
13250	0.825935	0.530825	0.672897	0.671038	0.508817
13260	0.809579	0.535005	0.681075	0.669914	0.506829
13270	0.809579	0.513062	0.650701	0.652304	0.48033
13280	0.823598	0.508882	0.678738	0.664294	0.499525
13290	0.800234	0.526646	0.674065	0.661671	0.494869
13300	0.80257	0.53187	0.700935	0.672911	0.512515
13310	0.795561	0.53187	0.662383	0.658299	0.489314
13320	0.809579	0.505747	0.665888	0.654552	0.484504
13330	0.829439	0.577847	0.654206	0.683027	0.524741
13340	0.816589	0.554859	0.646028	0.66804	0.502824
13350	0.832944	0.515152	0.66472	0.665043	0.499692
13360	0.796729	0.520376	0.669393	0.6568	0.487776
13370	0.809579	0.567398	0.668224	0.677407	0.516699
13380	0.806075	0.518286	0.683411	0.663544	0.497843
13390	0.836449	0.53187	0.651869	0.66804	0.503645
13400	0.803738	0.539185	0.671729	0.666542	0.5014
13410	0.815421	0.509927	0.693925	0.666916	0.503583
13420	0.807243	0.526646	0.640187	0.653054	0.480693
13430	0.829439	0.54023	0.635514	0.663544	0.496453
13440	0.830607	0.504702	0.689252	0.668415	0.507017
13450	0.799065	0.569488	0.649533	0.66879	0.503035
13460	0.795561	0.526646	0.686916	0.664294	0.499104
13470	0.810748	0.525601	0.681075	0.666916	0.502982
13480	0.811916	0.54023	0.640187	0.659423	0.489613
13490	0.796729	0.53187	0.648364	0.654178	0.481988
13500	0.813084	0.514107	0.679907	0.66317	0.497183
13510	0.792056	0.556949	0.647196	0.661296	0.493126
13520	0.818925	0.520376	0.676402	0.666167	0.501642
13530	0.808411	0.505747	0.681075	0.659048	0.491704
13540	0.821262	0.560084	0.640187	0.669539	0.50514
13550	0.808411	0.513062	0.668224	0.65755	0.488793
13560	0.800234	0.539185	0.656542	0.660547	0.491774
13570	0.818925	0.530825	0.650701	0.661671	0.494149
13580	0.815421	0.53605	0.655374	0.663919	0.49666
13590	0.772196	0.547544	0.651869	0.653054	0.480199
13600	0.796729	0.53396	0.642523	0.653054	0.480522
13610	0.818925	0.492163	0.669393	0.653803	0.484138
13620	0.804907	0.539185	0.649533	0.659798	0.490911
13630	0.824766	0.517241	0.67757	0.667291	0.503608
13640	0.825935	0.560084	0.654206	0.675534	0.514606
13650	0.827103	0.501567	0.660047	0.6568	0.488272
13660	0.814252	0.509927	0.640187	0.649307	0.475773
13670	0.817757	0.505747	0.683411	0.662795	0.497605
13680	0.804907	0.528736	0.690421	0.669164	0.506391
13690	0.807243	0.512017	0.661215	0.654552	0.483905
13700	0.821262	0.528736	0.683411	0.672162	0.511173
13710	0.804907	0.504702	0.700935	0.663919	0.499664
13720	0.809579	0.513062	0.679907	0.661671	0.494954
13730	0.794393	0.506792	0.686916	0.6568	0.488029
13740	0.816589	0.552769	0.662383	0.672537	0.509744
13750	0.815421	0.523511	0.692757	0.671413	0.509293
13760	0.820093	0.528736	0.655374	0.662795	0.49601
13770	0.806075	0.504702	0.654206	0.649307	0.476025
13780	0.797897	0.53187	0.668224	0.660922	0.493506
13790	0.803738	0.497388	0.696262	0.659423	0.492887
13800	0.809579	0.554859	0.667056	0.672537	0.509944
13810	0.809579	0.516196	0.690421	0.666167	0.502605
13820	0.823598	0.513062	0.672897	0.663919	0.498938
13830	0.797897	0.53187	0.661215	0.658674	0.489583
13840	0.828271	0.518286	0.678738	0.669164	0.506519
13850	0.799065	0.490073	0.703271	0.65755	0.490415
13860	0.809579	0.53187	0.663551	0.66317	0.496437
13870	0.824766	0.53814	0.650701	0.666167	0.500526
13880	0.801402	0.54023	0.643692	0.657175	0.48668
13890	0.823598	0.555904	0.67757	0.680779	0.522383
13900	0.790888	0.520376	0.663551	0.653054	0.48166
13910	0.834112	0.502612	0.676402	0.664668	0.500686
13920	0.809579	0.550679	0.681075	0.675534	0.515197
13930	0.810748	0.53187	0.665888	0.664294	0.497738
13940	0.817757	0.519331	0.679907	0.666542	0.502619
13950	0.806075	0.521421	0.654206	0.655302	0.484825
13960	0.830607	0.515152	0.67757	0.668415	0.505228
13970	0.80257	0.555904	0.628505	0.658299	0.487328
13980	0.815421	0.54023	0.661215	0.667291	0.502059
13990	0.804907	0.54441	0.665888	0.666916	0.501692
14000	0.807243	0.551724	0.636682	0.660922	0.491655
14010	0.813084	0.557994	0.665888	0.67441	0.512667
14020	0.813084	0.541275	0.669393	0.669539	0.505588
14030	0.815421	0.532915	0.665888	0.666167	0.501172
14040	0.830607	0.515152	0.663551	0.663919	0.498217
14050	0.827103	0.530825	0.71028	0.683402	0.528674
14060	0.806075	0.54232	0.650701	0.661671	0.493751
14070	0.804907	0.551724	0.65771	0.666916	0.500602
14080	0.823598	0.530825	0.674065	0.670663	0.508102
14090	0.828271	0.502612	0.667056	0.659798	0.492983
14100	0.811916	0.560084	0.656542	0.671787	0.508281
14110	0.820093	0.532915	0.670561	0.669164	0.504924
14120	0.811916	0.481714	0.678738	0.650806	0.480155
14130	0.794393	0.541275	0.711449	0.677033	0.518248
14140	0.804907	0.497388	0.696262	0.659798	0.494019
14150	0.816589	0.539185	0.67757	0.672537	0.51049
14160	0.84229	0.524556	0.661215	0.670288	0.507554
14170	0.810748	0.522466	0.668224	0.661671	0.494713
14180	0.793224	0.530825	0.686916	0.665043	0.500139
14190	0.796729	0.504702	0.65771	0.647433	0.473704
14200	0.818925	0.521421	0.665888	0.66317	0.497173
14210	0.816589	0.514107	0.648364	0.654178	0.483061
14220	0.811916	0.520376	0.661215	0.659048	0.491112
14230	0.817757	0.54232	0.658879	0.66804	0.503228
14240	0.815421	0.575758	0.646028	0.675159	0.513062
14250	0.813084	0.535005	0.66472	0.665792	0.500132
14260	0.809579	0.520376	0.670561	0.661296	0.494157
14270	0.829439	0.522466	0.661215	0.665418	0.499855
14280	0.801402	0.576803	0.663551	0.676658	0.515145
14290	0.806075	0.561129	0.676402	0.676658	0.515769
14300	0.807243	0.560084	0.67757	0.677033	0.516921
14310	0.814252	0.550679	0.656542	0.669164	0.504917
14320	0.797897	0.527691	0.67757	0.66242	0.495251
14330	0.821262	0.54441	0.675234	0.675159	0.514277
14340	0.807243	0.53605	0.671729	0.666542	0.501666
14350	0.815421	0.575758	0.660047	0.679655	0.519664
14360	0.806075	0.541275	0.65771	0.663544	0.49664
14370	0.82243	0.522466	0.665888	0.664668	0.499694
14380	0.830607	0.485893	0.686916	0.660922	0.495976
14390	0.788551	0.520376	0.648364	0.647433	0.47243
14400	0.830607	0.574713	0.663551	0.685275	0.528349
14410	0.797897	0.535005	0.656542	0.658299	0.488272
14420	0.811916	0.554859	0.660047	0.671038	0.508031
14430	0.801402	0.545455	0.636682	0.6568	0.485555
14440	0.817757	0.576803	0.635514	0.672911	0.509407
14450	0.829439	0.526646	0.695093	0.677782	0.51952
14460	0.832944	0.53814	0.684579	0.679655	0.521913
14470	0.803738	0.53187	0.706776	0.675159	0.515791
14480	0.820093	0.543365	0.682243	0.676658	0.517019
14490	0.821262	0.545455	0.662383	0.671413	0.508516
14500	0.82243	0.509927	0.67757	0.663919	0.499087
14510	0.813084	0.547544	0.65771	0.66804	0.502815
14520	0.813084	0.504702	0.678738	0.659423	0.492626
14530	0.821262	0.53605	0.667056	0.669539	0.50602
14540	0.801402	0.54023	0.682243	0.669539	0.505871
14550	0.830607	0.541275	0.678738	0.678157	0.519579
14560	0.827103	0.569488	0.674065	0.68565	0.529489
14570	0.813084	0.551724	0.642523	0.664668	0.497615
14580	0.815421	0.535005	0.661215	0.665418	0.499657
14590	0.803738	0.517241	0.672897	0.659048	0.491433
14600	0.820093	0.517241	0.651869	0.65755	0.48893
14610	0.818925	0.484848	0.681075	0.654927	0.485979
14620	0.797897	0.499478	0.679907	0.653054	0.481512
14630	0.814252	0.54023	0.656542	0.665418	0.499062
14640	0.821262	0.502612	0.71729	0.673661	0.515639
14650	0.813084	0.53605	0.635514	0.6568	0.486183
14660	0.796729	0.54023	0.661215	0.661296	0.49324
14670	0.813084	0.53605	0.69743	0.676658	0.51723
14680	0.818925	0.554859	0.661215	0.673661	0.511667
14690	0.82243	0.537095	0.634346	0.659798	0.490725
14700	0.790888	0.517241	0.667056	0.653054	0.481703
14710	0.82243	0.520376	0.679907	0.668415	0.505466
14720	0.811916	0.562173	0.648364	0.669914	0.505319
14730	0.815421	0.556949	0.649533	0.669539	0.50563
14740	0.803738	0.521421	0.650701	0.653428	0.481492
14750	0.816589	0.548589	0.647196	0.666167	0.499903
14760	0.793224	0.526646	0.678738	0.660922	0.492783
14770	0.780374	0.528736	0.686916	0.660172	0.492079
14780	0.808411	0.498433	0.651869	0.647059	0.472997
14790	0.807243	0.54441	0.698598	0.678157	0.519808
14800	0.821262	0.543365	0.648364	0.666167	0.500387
14810	0.792056	0.505747	0.692757	0.65755	0.489767
14820	0.846963	0.509927	0.696262	0.677782	0.520675
14830	0.815421	0.547544	0.691589	0.679655	0.521753
14840	0.803738	0.505747	0.67757	0.656426	0.487775
14850	0.814252	0.518286	0.688084	0.667666	0.504025
14860	0.794393	0.507837	0.691589	0.658674	0.49084
14870	0.792056	0.516196	0.668224	0.653428	0.482112
14880	0.806075	0.516196	0.682243	0.66242	0.496481
14890	0.821262	0.522466	0.670561	0.665792	0.500437
14900	0.818925	0.53187	0.676402	0.670288	0.507708
14910	0.816589	0.529781	0.663551	0.664668	0.498759
14920	0.818925	0.585162	0.63785	0.677033	0.515543
14930	0.807243	0.547544	0.643692	0.661671	0.492943
14940	0.820093	0.514107	0.651869	0.656426	0.487008
14950	0.823598	0.516196	0.649533	0.65755	0.48847
14960	0.811916	0.516196	0.669393	0.660172	0.492348
14970	0.807243	0.53814	0.670561	0.666916	0.501838
14980	0.773364	0.523511	0.669393	0.650431	0.477128
14990	0.808411	0.521421	0.656542	0.6568	0.487033
15000	0.792056	0.519331	0.665888	0.653803	0.482109
15010	0.829439	0.516196	0.674065	0.667291	0.504086
15020	0.80257	0.516196	0.668224	0.6568	0.487309
15030	0.809579	0.514107	0.655374	0.654178	0.483033
15040	0.823598	0.528736	0.67757	0.671038	0.509646
15050	0.765187	0.53187	0.674065	0.652304	0.480104
15060	0.844626	0.53814	0.670561	0.678906	0.520207
15070	0.816589	0.543365	0.700935	0.681529	0.524445
15080	0.820093	0.555904	0.685748	0.682278	0.524848
15090	0.820093	0.560084	0.690421	0.685275	0.529269
15100	0.825935	0.556949	0.675234	0.681154	0.522894
15110	0.808411	0.553814	0.667056	0.671787	0.50892
15120	0.811916	0.552769	0.640187	0.663919	0.49698
15130	0.821262	0.576803	0.630841	0.672537	0.508871
15140	0.824766	0.550679	0.67757	0.679281	0.520825
15150	0.809579	0.574713	0.646028	0.672911	0.509923
15160	0.825935	0.518286	0.662383	0.66317	0.496512
15170	0.810748	0.486938	0.672897	0.650431	0.479509
15180	0.801402	0.497388	0.668224	0.649682	0.477373
15190	0.828271	0.492163	0.667056	0.656051	0.487539
15200	0.810748	0.517241	0.663551	0.658299	0.489501
15210	0.808411	0.498433	0.69743	0.661671	0.496311
15220	0.824766	0.562173	0.656542	0.676658	0.515686
15230	0.806075	0.517241	0.663551	0.6568	0.48739
15240	0.851636	0.515152	0.669393	0.672537	0.512001
15250	0.827103	0.584117	0.65771	0.68565	0.529286
15260	0.817757	0.472309	0.683411	0.650806	0.48076
15270	0.801402	0.515152	0.685748	0.661671	0.495095
15280	0.803738	0.506792	0.667056	0.653428	0.482301
15290	0.82243	0.529781	0.656542	0.664294	0.498541
15300	0.799065	0.53396	0.65771	0.658674	0.489064
15310	0.809579	0.516196	0.69743	0.668415	0.506092
15320	0.804907	0.496343	0.660047	0.647808	0.474528
15330	0.831776	0.53605	0.655374	0.669164	0.505233
15340	0.817757	0.515152	0.672897	0.662795	0.496877
15350	0.808411	0.532915	0.655374	0.660547	0.491951
15360	0.821262	0.514107	0.660047	0.659423	0.491556
15370	0.806075	0.564263	0.619159	0.659423	0.48872
15380	0.837617	0.508882	0.696262	0.67441	0.51588
15390	0.841121	0.561129	0.628505	0.672537	0.509856
15400	0.80257	0.560084	0.633178	0.661296	0.492306
15410	0.801402	0.506792	0.690421	0.660172	0.493321
15420	0.809579	0.537095	0.668224	0.666542	0.501495
15430	0.799065	0.529781	0.649533	0.654552	0.483285
15440	0.804907	0.537095	0.667056	0.664668	0.498446
15450	0.774533	0.522466	0.711449	0.663919	0.499103
15460	0.816589	0.505747	0.706776	0.669914	0.509655
15470	0.809579	0.543365	0.679907	0.672537	0.510735
15480	0.820093	0.541275	0.640187	0.66242	0.494739
15490	0.828271	0.519331	0.668224	0.666167	0.50116
15500	0.807243	0.552769	0.671729	0.672537	0.509959
15510	0.806075	0.569488	0.653037	0.672162	0.508351
15520	0.830607	0.513062	0.678738	0.66804	0.505429
15530	0.800234	0.527691	0.653037	0.655302	0.483835
15540	0.82243	0.524556	0.655374	0.662046	0.494701
15550	0.807243	0.484848	0.698598	0.6568	0.490357
15560	0.806075	0.474399	0.679907	0.646684	0.473838
15570	0.78972	0.546499	0.686916	0.669539	0.505969
15580	0.827103	0.54441	0.642523	0.666542	0.500905
15590	0.837617	0.54232	0.655374	0.673286	0.511555
15600	0.830607	0.53396	0.641355	0.663544	0.496436
15610	0.815421	0.53814	0.686916	0.674785	0.514134
15620	0.816589	0.514107	0.682243	0.665043	0.500073
15630	0.816589	0.525601	0.69743	0.674035	0.513946
15640	0.814252	0.548589	0.682243	0.676658	0.516315
15650	0.807243	0.493208	0.683411	0.654927	0.485854
15660	0.825935	0.526646	0.66472	0.666916	0.502385
15670	0.801402	0.504702	0.696262	0.661296	0.495137
15680	0.809579	0.525601	0.676402	0.665043	0.49967
15690	0.821262	0.517241	0.675234	0.665418	0.500761
15700	0.82243	0.527691	0.671729	0.668415	0.505091
15710	0.804907	0.53814	0.64486	0.657924	0.487796
15720	0.800234	0.529781	0.693925	0.669164	0.506393
15730	0.817757	0.510972	0.672897	0.661296	0.495166
15740	0.815421	0.54441	0.667056	0.670663	0.507454
15750	0.815421	0.494253	0.689252	0.659798	0.494027
15760	0.816589	0.543365	0.660047	0.668415	0.504325
15770	0.813084	0.514107	0.684579	0.664668	0.499649
15780	0.799065	0.53187	0.658879	0.658299	0.488767
15790	0.838785	0.552769	0.671729	0.682653	0.525421
15800	0.823598	0.529781	0.663551	0.666916	0.501923
15810	0.831776	0.53187	0.660047	0.669164	0.505516
15820	0.825935	0.561129	0.682243	0.684901	0.528676
15830	0.82243	0.541275	0.67757	0.675159	0.514624
15840	0.83528	0.53814	0.639019	0.665792	0.499698
15850	0.800234	0.530825	0.639019	0.65193	0.479088
15860	0.83528	0.546499	0.64486	0.670663	0.507479
15870	0.793224	0.550679	0.641355	0.65755	0.486935
15880	0.813084	0.530825	0.671729	0.666542	0.501063
15890	0.817757	0.543365	0.63785	0.661671	0.493158
15900	0.818925	0.554859	0.681075	0.68003	0.521512
15910	0.800234	0.551724	0.640187	0.659798	0.490385
15920	0.811916	0.518286	0.688084	0.666916	0.50382
15930	0.818925	0.54441	0.627336	0.659048	0.489143
15940	0.799065	0.523511	0.691589	0.665792	0.501097
15950	0.828271	0.516196	0.706776	0.677407	0.519305
15960	0.824766	0.507837	0.684579	0.666167	0.502497
15970	0.804907	0.519331	0.682243	0.66317	0.497917
15980	0.813084	0.566353	0.634346	0.667291	0.501342
15990	0.786215	0.500522	0.676402	0.648558	0.475235
16000	0.824766	0.53814	0.654206	0.667291	0.502537
16010	0.820093	0.543365	0.615654	0.655302	0.4836
16020	0.817757	0.53814	0.688084	0.675909	0.516084
16030	0.813084	0.539185	0.643692	0.660547	0.491597
16040	0.817757	0.554859	0.635514	0.665043	0.498155
16050	0.823598	0.530825	0.684579	0.674035	0.513833
16060	0.808411	0.53187	0.678738	0.667666	0.503637
16070	0.803738	0.574713	0.636682	0.66804	0.501875
16080	0.825935	0.498433	0.650701	0.652304	0.480496
16090	0.838785	0.514107	0.672897	0.669164	0.506998
16100	0.813084	0.53605	0.656542	0.663544	0.497618
16110	0.811916	0.503657	0.703271	0.666542	0.503551
16120	0.82243	0.530825	0.67757	0.671413	0.509268
16130	0.810748	0.494253	0.679907	0.655302	0.486049
16140	0.817757	0.515152	0.676402	0.663919	0.4983
16150	0.811916	0.549634	0.662383	0.669914	0.505707
16160	0.820093	0.571578	0.646028	0.675159	0.513132
16170	0.813084	0.539185	0.663551	0.666916	0.501957
16180	0.834112	0.54023	0.689252	0.682278	0.52501
16190	0.794393	0.565308	0.661215	0.669539	0.505149
16200	0.829439	0.475444	0.67757	0.653803	0.485309
16210	0.799065	0.527691	0.674065	0.661671	0.494553
16220	0.823598	0.54232	0.686916	0.678906	0.52057
16230	0.779206	0.546499	0.683411	0.665043	0.498536
16240	0.808411	0.560084	0.636682	0.664294	0.497056
16250	0.807243	0.557994	0.670561	0.674035	0.512254
16260	0.84229	0.547544	0.665888	0.68003	0.521876
16270	0.808411	0.532915	0.65771	0.661296	0.493743
16280	0.783879	0.554859	0.654206	0.660172	0.490842
16290	0.817757	0.500522	0.658879	0.653054	0.482276
16300	0.804907	0.53187	0.653037	0.658299	0.488882
16310	0.801402	0.539185	0.630841	0.652679	0.479785
16320	0.832944	0.53814	0.655374	0.670288	0.507405
16330	0.811916	0.54441	0.670561	0.670663	0.507364
16340	0.813084	0.539185	0.695093	0.677033	0.517907
16350	0.814252	0.518286	0.654206	0.6568	0.487158
16360	0.814252	0.520376	0.671729	0.66317	0.497393
16370	0.793224	0.491118	0.670561	0.64556	0.470962
16380	0.809579	0.561129	0.669393	0.675534	0.514347
16390	0.83528	0.550679	0.649533	0.673661	0.511725
16400	0.821262	0.497388	0.661215	0.653803	0.483523
16410	0.825935	0.528736	0.660047	0.666167	0.501153
16420	0.797897	0.556949	0.681075	0.674035	0.512239
16430	0.832944	0.515152	0.692757	0.674035	0.514554
16440	0.813084	0.573668	0.646028	0.673661	0.510798
16450	0.82243	0.591432	0.614486	0.672911	0.508832
16460	0.792056	0.54441	0.654206	0.659048	0.48908
16470	0.801402	0.519331	0.676402	0.660172	0.492693
16480	0.810748	0.537095	0.714953	0.681903	0.525722
16490	0.817757	0.530825	0.674065	0.66879	0.505064
16500	0.815421	0.517241	0.671729	0.66242	0.496786
16510	0.810748	0.547544	0.663551	0.669164	0.505037
16520	0.83528	0.477534	0.685748	0.659048	0.493258
16530	0.813084	0.500522	0.670561	0.655302	0.486031
16540	0.804907	0.523511	0.660047	0.65755	0.488127
16550	0.82243	0.523511	0.678738	0.669164	0.506069
16560	0.810748	0.559039	0.630841	0.662795	0.494596
16570	0.808411	0.515152	0.681075	0.66242	0.49654
16580	0.816589	0.54023	0.649533	0.663919	0.497476
16590	0.788551	0.551724	0.646028	0.657924	0.487209
16600	0.815421	0.571578	0.65771	0.677407	0.516174
16610	0.816589	0.521421	0.632009	0.651555	0.478337
16620	0.821262	0.547544	0.641355	0.665418	0.498756
16630	0.823598	0.550679	0.617991	0.659798	0.489834
16640	0.829439	0.53396	0.628505	0.659048	0.489896
16650	0.811916	0.562173	0.654206	0.671787	0.50822
16660	0.820093	0.467085	0.696262	0.653803	0.485647
16670	0.806075	0.553814	0.620327	0.656051	0.483966
16680	0.825935	0.541275	0.669393	0.673661	0.512703
16690	0.781542	0.585162	0.64486	0.667291	0.500589
16700	0.80257	0.517241	0.663551	0.655676	0.485511
16710	0.815421	0.512017	0.676402	0.662046	0.495289
16720	0.804907	0.499478	0.696262	0.660547	0.494659
16730	0.849299	0.53605	0.650701	0.673286	0.511554
16740	0.818925	0.571578	0.628505	0.669164	0.504038
16750	0.800234	0.477534	0.691589	0.649682	0.479933
16760	0.834112	0.547544	0.698598	0.687898	0.534304
16770	0.807243	0.546499	0.617991	0.653054	0.479758
16780	0.820093	0.499478	0.678738	0.659798	0.493638
16790	0.823598	0.553814	0.654206	0.672537	0.509833
16800	0.795561	0.528736	0.662383	0.657175	0.48757
16810	0.821262	0.555904	0.647196	0.670288	0.506617
16820	0.817757	0.504702	0.704439	0.669164	0.507955
16830	0.823598	0.515152	0.670561	0.663919	0.499258
16840	0.821262	0.508882	0.695093	0.66879	0.506434
16850	0.811916	0.575758	0.670561	0.681903	0.523567
16860	0.815421	0.512017	0.663551	0.657924	0.488988
16870	0.810748	0.505747	0.667056	0.655302	0.486206
16880	0.813084	0.561129	0.641355	0.667666	0.502239
16890	0.817757	0.541275	0.658879	0.667666	0.502911
16900	0.817757	0.495298	0.663551	0.652679	0.482141
16910	0.807243	0.539185	0.66472	0.665418	0.4996
16920	0.817757	0.554859	0.669393	0.675909	0.51501
16930	0.813084	0.522466	0.661215	0.660172	0.491918
16940	0.803738	0.513062	0.669393	0.656426	0.486889
16950	0.825935	0.552769	0.663551	0.675909	0.514851
16960	0.790888	0.546499	0.672897	0.665418	0.499276
16970	0.828271	0.498433	0.681075	0.662795	0.49819
16980	0.816589	0.523511	0.699766	0.674035	0.515241
16990	0.797897	0.560084	0.639019	0.661671	0.492572
17000	0.797897	0.546499	0.654206	0.661671	0.493236
17010	0.808411	0.509927	0.691589	0.663919	0.499616
17020	0.811916	0.498433	0.660047	0.650806	0.479098
17030	0.811916	0.539185	0.703271	0.679281	0.521546
17040	0.815421	0.528736	0.674065	0.667291	0.502923
17050	0.828271	0.563218	0.636682	0.671787	0.5081
17060	0.810748	0.562173	0.668224	0.675909	0.514753
17070	0.813084	0.520376	0.655374	0.65755	0.488016
17080	0.830607	0.510972	0.676402	0.666542	0.502571
17090	0.793224	0.532915	0.692757	0.667666	0.503256
17100	0.821262	0.514107	0.686916	0.66804	0.505118
17110	0.816589	0.559039	0.682243	0.681154	0.52334
17120	0.821262	0.550679	0.626168	0.661671	0.49316
17130	0.810748	0.517241	0.658879	0.6568	0.48744
17140	0.793224	0.496343	0.665888	0.645935	0.471987
17150	0.814252	0.54023	0.642523	0.660922	0.492795
17160	0.815421	0.492163	0.636682	0.642188	0.46602
17170	0.804907	0.555904	0.656542	0.66804	0.502854
17180	0.806075	0.550679	0.619159	0.654552	0.482049
17190	0.817757	0.528736	0.689252	0.672911	0.512274
17200	0.808411	0.493208	0.658879	0.647433	0.474216
17210	0.797897	0.53605	0.634346	0.651555	0.47791
17220	0.827103	0.529781	0.642523	0.661296	0.493489
17230	0.829439	0.513062	0.668224	0.664294	0.499215
17240	0.80257	0.546499	0.669393	0.66804	0.50353
17250	0.836449	0.525601	0.650701	0.665418	0.500747
17260	0.823598	0.551724	0.64486	0.66879	0.504221
17270	0.830607	0.537095	0.668224	0.673286	0.511978
17280	0.808411	0.54232	0.661215	0.665792	0.499463
17290	0.824766	0.54023	0.65771	0.669164	0.505435
17300	0.804907	0.555904	0.665888	0.671038	0.507044
17310	0.823598	0.519331	0.663551	0.66317	0.496538
17320	0.810748	0.529781	0.663551	0.662795	0.495669
17330	0.796729	0.550679	0.662383	0.665418	0.49885
17340	0.811916	0.54023	0.668224	0.668415	0.503739
17350	0.808411	0.510972	0.679907	0.660547	0.493722
17360	0.834112	0.527691	0.679907	0.674785	0.514897
17370	0.810748	0.575758	0.640187	0.671787	0.507607
17380	0.821262	0.541275	0.627336	0.658674	0.488649
17390	0.821262	0.526646	0.65771	0.66317	0.496167
17400	0.823598	0.546499	0.672897	0.675909	0.515433
17410	0.810748	0.522466	0.648364	0.655302	0.484202
17420	0.801402	0.572623	0.633178	0.665418	0.498069
17430	0.817757	0.522466	0.647196	0.657175	0.487026
17440	0.80257	0.53396	0.685748	0.66879	0.506139
17450	0.813084	0.503657	0.706776	0.66804	0.507128
17460	0.807243	0.537095	0.667056	0.665418	0.500038
17470	0.827103	0.498433	0.678738	0.661671	0.496297
17480	0.794393	0.510972	0.64486	0.644811	0.468353
17490	0.800234	0.53187	0.695093	0.670288	0.507558
17500	0.824766	0.559039	0.653037	0.67441	0.512122
17510	0.806075	0.535005	0.678738	0.66804	0.503692
17520	0.817757	0.527691	0.623832	0.651555	0.478799
17530	0.820093	0.509927	0.682243	0.664668	0.499581
17540	0.818925	0.529781	0.665888	0.666167	0.501591
17550	0.795561	0.561129	0.630841	0.658674	0.48781
17560	0.80257	0.514107	0.678738	0.659423	0.492213
17570	0.810748	0.490073	0.684579	0.655302	0.488371
17580	0.810748	0.551724	0.625	0.658299	0.487398
17590	0.839953	0.550679	0.627336	0.66804	0.502727
17600	0.804907	0.552769	0.653037	0.665792	0.499306
17610	0.817757	0.508882	0.682243	0.663544	0.498761
17620	0.823598	0.495298	0.698598	0.665792	0.503015
17630	0.799065	0.525601	0.650701	0.653428	0.481762
17640	0.814252	0.501567	0.675234	0.65755	0.488912
17650	0.807243	0.519331	0.682243	0.663919	0.49857
17660	0.809579	0.514107	0.64486	0.650806	0.478997
17670	0.797897	0.547544	0.646028	0.659423	0.490094
17680	0.806075	0.559039	0.656542	0.669539	0.504947
17690	0.807243	0.530825	0.683411	0.668415	0.505002
17700	0.821262	0.518286	0.696262	0.672537	0.512017
17710	0.799065	0.549634	0.63785	0.657924	0.487122
17720	0.821262	0.522466	0.642523	0.6568	0.486975
17730	0.813084	0.523511	0.671729	0.663919	0.497517
17740	0.825935	0.551724	0.667056	0.676658	0.516543
17750	0.824766	0.53814	0.643692	0.663919	0.497112
17760	0.804907	0.53187	0.649533	0.657175	0.486584
17770	0.806075	0.54441	0.665888	0.667291	0.50192
17780	0.801402	0.53814	0.683411	0.669164	0.505501
17790	0.809579	0.529781	0.672897	0.665418	0.500035
17800	0.824766	0.476489	0.69743	0.659048	0.493926
17810	0.811916	0.567398	0.642523	0.669914	0.504928
17820	0.794393	0.516196	0.691589	0.661671	0.49593
17830	0.818925	0.519331	0.626168	0.649682	0.475706
17840	0.810748	0.521421	0.671729	0.66242	0.495782
17850	0.83528	0.553814	0.636682	0.670663	0.506722
17860	0.794393	0.514107	0.674065	0.655302	0.485265
17870	0.829439	0.543365	0.641355	0.666542	0.501294
17880	0.797897	0.521421	0.678738	0.660547	0.49243
17890	0.828271	0.520376	0.63785	0.6568	0.48725
17900	0.795561	0.557994	0.647196	0.662795	0.494656
17910	0.807243	0.53187	0.654206	0.659423	0.490745
17920	0.817757	0.497388	0.686916	0.660922	0.49531
17930	0.809579	0.535005	0.665888	0.665043	0.498877
17940	0.790888	0.520376	0.688084	0.660922	0.493943
17950	0.820093	0.524556	0.661215	0.66317	0.496628
17960	0.824766	0.521421	0.698598	0.675534	0.516758
17970	0.809579	0.555904	0.633178	0.662046	0.493808
17980	0.821262	0.496343	0.695093	0.664294	0.500741
17990	0.795561	0.528736	0.65771	0.655676	0.485315
18000	0.825935	0.53605	0.662383	0.669539	0.506509
18010	0.815421	0.516196	0.690421	0.66804	0.50542
18020	0.84229	0.496343	0.684579	0.667666	0.505453
18030	0.817757	0.526646	0.669393	0.665792	0.501761
18040	0.816589	0.571578	0.634346	0.670288	0.505863
18050	0.788551	0.519331	0.67757	0.656426	0.487528
18060	0.816589	0.562173	0.627336	0.664668	0.496955
18070	0.787383	0.508882	0.700935	0.659798	0.493269
18080	0.797897	0.546499	0.654206	0.661671	0.492898
18090	0.839953	0.54023	0.658879	0.67441	0.513032
18100	0.813084	0.574713	0.635514	0.670663	0.506101
18110	0.810748	0.54441	0.648364	0.66317	0.495589
18120	0.785047	0.519331	0.689252	0.659048	0.490511
18130	0.821262	0.520376	0.660047	0.661671	0.494723
18140	0.830607	0.532915	0.668224	0.671787	0.509695
18150	0.816589	0.520376	0.67757	0.665792	0.500848
18160	0.813084	0.525601	0.667056	0.66317	0.496569
18170	0.816589	0.54441	0.665888	0.670663	0.507386
18180	0.83528	0.527691	0.689252	0.678157	0.520038
18190	0.794393	0.523511	0.684579	0.662046	0.495861
18200	0.818925	0.556949	0.642523	0.668415	0.503403
18210	0.80257	0.524556	0.655374	0.655676	0.484793
18220	0.810748	0.550679	0.641355	0.66317	0.495585
18230	0.800234	0.564263	0.674065	0.675159	0.513436
18240	0.808411	0.520376	0.648364	0.653803	0.48197
18250	0.809579	0.485893	0.699766	0.658299	0.491708
18260	0.792056	0.529781	0.685748	0.663919	0.49819
18270	0.817757	0.490073	0.679907	0.656051	0.487728
18280	0.816589	0.524556	0.634346	0.653428	0.481035
18290	0.786215	0.548589	0.658879	0.660172	0.490837
18300	0.817757	0.516196	0.672897	0.66317	0.497222
18310	0.806075	0.535005	0.656542	0.660922	0.492706
18320	0.807243	0.502612	0.643692	0.64556	0.470621
18330	0.800234	0.537095	0.649533	0.65755	0.487313
18340	0.803738	0.503657	0.699766	0.662795	0.497877
18350	0.829439	0.505747	0.67757	0.664668	0.500082
18360	0.827103	0.552769	0.656542	0.674035	0.512308
18370	0.811916	0.520376	0.599299	0.639191	0.45968
18380	0.799065	0.508882	0.678738	0.656426	0.487727
18390	0.818925	0.520376	0.658879	0.660547	0.492693
18400	0.817757	0.54232	0.684579	0.676283	0.516527
18410	0.831776	0.539185	0.674065	0.676283	0.516297
18420	0.813084	0.594566	0.661215	0.686025	0.528785
18430	0.796729	0.535005	0.663551	0.660172	0.491251
18440	0.82243	0.501567	0.691589	0.665418	0.502469
18450	0.823598	0.521421	0.679907	0.669164	0.506686
18460	0.817757	0.503657	0.688084	0.663544	0.498905
18470	0.801402	0.53396	0.655374	0.658674	0.489453
18480	0.804907	0.564263	0.639019	0.665418	0.498165
18490	0.811916	0.519331	0.692757	0.66879	0.506766
18500	0.820093	0.567398	0.651869	0.675534	0.514065
18510	0.801402	0.527691	0.686916	0.666542	0.502377
18520	0.796729	0.53187	0.653037	0.655676	0.484873
18530	0.820093	0.530825	0.681075	0.671787	0.51022
18540	0.820093	0.490073	0.690421	0.660172	0.494528
18550	0.849299	0.518286	0.663551	0.671038	0.509754
18560	0.783879	0.539185	0.653037	0.654178	0.482117
18570	0.827103	0.549634	0.663551	0.675159	0.513892
18580	0.815421	0.571578	0.655374	0.676658	0.515392
18590	0.795561	0.545455	0.663551	0.663544	0.496774
18600	0.809579	0.494253	0.706776	0.663544	0.499373
18610	0.823598	0.529781	0.639019	0.659048	0.489889
18620	0.800234	0.526646	0.681075	0.663919	0.498494
18630	0.816589	0.521421	0.663551	0.661671	0.495437
18640	0.821262	0.54023	0.655374	0.667291	0.502129
18650	0.815421	0.552769	0.686916	0.68003	0.521649
18660	0.825935	0.535005	0.69743	0.680405	0.523468
18670	0.811916	0.513062	0.693925	0.666916	0.503584
18680	0.815421	0.508882	0.660047	0.655676	0.485788
18690	0.817757	0.541275	0.674065	0.672537	0.510486
18700	0.807243	0.567398	0.654206	0.672162	0.508422
18710	0.815421	0.510972	0.698598	0.66879	0.506271
18720	0.814252	0.548589	0.65771	0.66879	0.504887
18730	0.818925	0.525601	0.651869	0.660172	0.492007
18740	0.806075	0.505747	0.681075	0.658299	0.49101
18750	0.804907	0.541275	0.656542	0.662795	0.495021
18760	0.813084	0.539185	0.647196	0.661671	0.494056
18770	0.849299	0.513062	0.651869	0.665418	0.500899
18780	0.808411	0.495298	0.670561	0.65193	0.480497
18790	0.814252	0.507837	0.698598	0.667291	0.504368
18800	0.801402	0.551724	0.714953	0.684151	0.528916
18810	0.80257	0.520376	0.660047	0.655676	0.485448
18820	0.817757	0.512017	0.670561	0.660922	0.494078
18830	0.810748	0.54441	0.671729	0.670663	0.507301
18840	0.803738	0.552769	0.649533	0.664294	0.496842
18850	0.800234	0.53814	0.669393	0.664294	0.497735
18860	0.821262	0.491118	0.698598	0.663544	0.50021
18870	0.808411	0.507837	0.699766	0.665792	0.502104
18880	0.837617	0.504702	0.698598	0.673661	0.514591
18890	0.809579	0.504702	0.685748	0.660547	0.493612
18900	0.80257	0.561129	0.646028	0.665792	0.499082
18910	0.803738	0.499478	0.703271	0.66242	0.49828
18920	0.797897	0.498433	0.691589	0.656426	0.488569
18930	0.816589	0.563218	0.683411	0.683027	0.52552
18940	0.810748	0.522466	0.641355	0.653054	0.480776
18950	0.825935	0.539185	0.670561	0.673286	0.512237
18960	0.796729	0.570533	0.628505	0.661671	0.492144
18970	0.807243	0.537095	0.679907	0.669539	0.505685
18980	0.800234	0.528736	0.636682	0.650431	0.47656
18990	0.828271	0.574713	0.621495	0.671038	0.506474
19000	0.800234	0.479624	0.693925	0.65118	0.481725
19010	0.804907	0.518286	0.668224	0.658299	0.489172
19020	0.839953	0.535005	0.656542	0.671787	0.509598
19030	0.811916	0.509927	0.675234	0.659798	0.491879
19040	0.817757	0.527691	0.643692	0.657924	0.488314
19050	0.809579	0.523511	0.646028	0.654552	0.482951
19060	0.816589	0.545455	0.643692	0.663919	0.496718
19070	0.787383	0.54441	0.661215	0.659798	0.490333
19080	0.818925	0.561129	0.686916	0.684151	0.527577
19090	0.834112	0.509927	0.669393	0.665043	0.500575
19100	0.808411	0.517241	0.676402	0.661671	0.496034
19110	0.818925	0.504702	0.678738	0.661296	0.495518
19120	0.807243	0.543365	0.658879	0.665043	0.498375
19130	0.813084	0.563218	0.642523	0.66879	0.504004
19140	0.828271	0.54232	0.675234	0.676658	0.516743
19150	0.807243	0.505747	0.684579	0.659798	0.493383
19160	0.800234	0.514107	0.693925	0.663544	0.498241
19170	0.815421	0.527691	0.707944	0.677782	0.520483
19180	0.809579	0.573668	0.672897	0.681154	0.522161
19190	0.787383	0.595611	0.636682	0.670288	0.504663
19200	0.827103	0.514107	0.683411	0.66879	0.506391
19210	0.821262	0.525601	0.672897	0.667666	0.503856
19220	0.814252	0.535005	0.63785	0.65755	0.487131
19230	0.837617	0.502612	0.648364	0.6568	0.488663
19240	0.818925	0.539185	0.632009	0.658674	0.489255
19250	0.821262	0.54232	0.695093	0.680779	0.523504
19260	0.823598	0.520376	0.689252	0.671787	0.511162
19270	0.827103	0.549634	0.671729	0.677782	0.518576
19280	0.829439	0.553814	0.671729	0.68003	0.521507
19290	0.818925	0.559039	0.632009	0.665792	0.499566
19300	0.803738	0.54023	0.671729	0.666916	0.501758
19310	0.811916	0.550679	0.662383	0.670288	0.506658
19320	0.82243	0.528736	0.656542	0.663919	0.497532
19330	0.811916	0.501567	0.679907	0.658299	0.491438
19340	0.806075	0.516196	0.684579	0.66317	0.497201
19350	0.834112	0.525601	0.630841	0.658299	0.488764
19360	0.808411	0.518286	0.662383	0.65755	0.488417
19370	0.80257	0.516196	0.690421	0.663919	0.498943
19380	0.810748	0.497388	0.650701	0.647059	0.472979
19390	0.814252	0.487983	0.711449	0.664294	0.501614
19400	0.828271	0.541275	0.684579	0.679281	0.520938
19410	0.823598	0.502612	0.65771	0.655302	0.486005
19420	0.83528	0.586207	0.634346	0.681529	0.522604
19430	0.831776	0.562173	0.647196	0.675909	0.514661
19440	0.804907	0.567398	0.656542	0.672162	0.508485
19450	0.807243	0.521421	0.634346	0.649307	0.47526
19460	0.807243	0.519331	0.649533	0.653428	0.481483
19470	0.815421	0.507837	0.642523	0.649682	0.476921
19480	0.809579	0.532915	0.641355	0.656426	0.486292
19490	0.804907	0.588297	0.650701	0.677782	0.5166
19500	0.790888	0.528736	0.653037	0.652679	0.479889
19510	0.793224	0.501567	0.65771	0.645185	0.470303
19520	0.808411	0.527691	0.647196	0.656051	0.485369
19530	0.806075	0.521421	0.668224	0.659798	0.491677
19540	0.811916	0.519331	0.653037	0.656051	0.485604
19550	0.795561	0.546499	0.696262	0.67441	0.513212
19560	0.80257	0.522466	0.647196	0.652304	0.479845
19570	0.853972	0.53396	0.682243	0.684151	0.529103
19580	0.820093	0.516196	0.655374	0.658299	0.489624
19590	0.831776	0.563218	0.643692	0.675159	0.513382
19600	0.794393	0.525601	0.647196	0.650806	0.477439
19610	0.831776	0.546499	0.646028	0.669914	0.505856
19620	0.817757	0.582027	0.647196	0.678531	0.518092
19630	0.78271	0.557994	0.682243	0.669914	0.506398
19640	0.80257	0.554859	0.654206	0.666167	0.499764
19650	0.823598	0.505747	0.654206	0.655302	0.485687
19660	0.796729	0.508882	0.689252	0.659048	0.491522
19670	0.813084	0.562173	0.653037	0.671787	0.508334
19680	0.84229	0.549634	0.64486	0.674035	0.512583
19690	0.815421	0.586207	0.641355	0.677407	0.516023
19700	0.836449	0.519331	0.692757	0.676658	0.518949
19710	0.827103	0.543365	0.653037	0.669539	0.506107
19720	0.828271	0.526646	0.706776	0.681154	0.525505
19730	0.80257	0.518286	0.65771	0.654178	0.483286
19740	0.829439	0.530825	0.668224	0.670663	0.508331
19750	0.809579	0.535005	0.633178	0.654552	0.482745
19760	0.809579	0.53187	0.665888	0.663919	0.497439
19770	0.818925	0.546499	0.635514	0.66242	0.494534
19780	0.820093	0.527691	0.674065	0.668415	0.50478
19790	0.817757	0.53814	0.663551	0.66804	0.503864
19800	0.808411	0.527691	0.696262	0.671787	0.510388
19810	0.818925	0.529781	0.678738	0.670288	0.508147
19820	0.806075	0.537095	0.663551	0.663919	0.497289
19830	0.841121	0.515152	0.640187	0.659798	0.492212
19840	0.814252	0.573668	0.634346	0.670288	0.505137
19850	0.811916	0.546499	0.636682	0.660547	0.491801
19860	0.811916	0.519331	0.683411	0.665792	0.501119
19870	0.786215	0.532915	0.66472	0.656426	0.485911
19880	0.814252	0.532915	0.66472	0.665418	0.499855
19890	0.810748	0.546499	0.66472	0.669164	0.505078
19900	0.772196	0.563218	0.661215	0.661671	0.492947
19910	0.814252	0.518286	0.693925	0.669539	0.506942
19920	0.828271	0.537095	0.643692	0.664668	0.498283
19930	0.817757	0.539185	0.667056	0.669539	0.505981
19940	0.813084	0.485893	0.683411	0.654178	0.485342
19950	0.800234	0.524556	0.696262	0.66804	0.50451
19960	0.816589	0.565308	0.655374	0.674785	0.5127
19970	0.824766	0.518286	0.625	0.650806	0.47734
19980	0.816589	0.526646	0.655374	0.660922	0.493243
19990	0.831776	0.507837	0.686916	0.669164	0.507339
[truncated: 1,128 more rows]

## Sheet: RF
Number of features	CGE	dMGE	vMGE	ACC	MCC
10	0.839953	0.492163	0.639019	0.650806	0.478704
20	0.889019	0.680251	0.667056	0.742975	0.6141
30	0.90771	0.725183	0.678738	0.768827	0.653444
40	0.920561	0.721003	0.679907	0.771825	0.657678
50	0.911215	0.748171	0.707944	0.787561	0.681274
60	0.926402	0.724138	0.713785	0.785688	0.678394
70	0.933411	0.743992	0.709112	0.793556	0.690362
80	0.926402	0.76907	0.71028	0.800674	0.701395
90	0.933411	0.757576	0.718458	0.801424	0.702415
100	0.942757	0.748171	0.714953	0.799925	0.700156
110	0.946262	0.723093	0.726636	0.795804	0.693954
120	0.945093	0.751306	0.732477	0.807419	0.711471
130	0.942757	0.770115	0.726636	0.81154	0.71759
140	0.94743	0.756531	0.731308	0.809667	0.714885
150	0.94743	0.750261	0.720794	0.804046	0.706316
160	0.942757	0.758621	0.723131	0.806294	0.709865
170	0.94743	0.749216	0.712617	0.801049	0.701845
180	0.945093	0.756531	0.712617	0.802922	0.704788
190	0.955607	0.740857	0.725467	0.804796	0.707626
200	0.949766	0.739812	0.732477	0.804796	0.707649
210	0.955607	0.759666	0.712617	0.807419	0.711931
220	0.949766	0.746082	0.731308	0.806669	0.710437
230	0.957944	0.752351	0.73014	0.811165	0.717404
240	0.957944	0.759666	0.73715	0.816036	0.724759
250	0.948598	0.741902	0.739486	0.807419	0.711387
260	0.953271	0.747126	0.739486	0.810791	0.716532
270	0.956776	0.746082	0.741822	0.812289	0.718929
280	0.954439	0.768025	0.723131	0.813413	0.720947
290	0.959112	0.740857	0.733645	0.808543	0.713378
300	0.956776	0.745037	0.718458	0.804421	0.707414
310	0.953271	0.756531	0.731308	0.81154	0.717837
320	0.953271	0.737722	0.732477	0.80517	0.708276
330	0.959112	0.753396	0.723131	0.809667	0.715497
340	0.953271	0.739812	0.733645	0.806294	0.710329
350	0.952103	0.739812	0.71729	0.800674	0.701609
360	0.953271	0.721003	0.723131	0.796178	0.694912
370	0.959112	0.745037	0.713785	0.803672	0.706296
380	0.959112	0.729363	0.732477	0.804046	0.70703
390	0.955607	0.743992	0.716121	0.802922	0.705372
400	0.959112	0.750261	0.716121	0.806294	0.710688
410	0.950935	0.740857	0.738318	0.807419	0.71193
420	0.956776	0.745037	0.719626	0.804796	0.708211
430	0.959112	0.721003	0.723131	0.798052	0.697988
440	0.956776	0.734587	0.733645	0.805545	0.709383
450	0.96028	0.726228	0.707944	0.795429	0.694482
460	0.949766	0.719958	0.713785	0.791682	0.688281
470	0.956776	0.725183	0.693925	0.789434	0.68551
480	0.96028	0.755486	0.721963	0.810416	0.716845
490	0.953271	0.736677	0.716121	0.79955	0.700111
500	0.962617	0.732497	0.711449	0.79955	0.700784
510	0.94743	0.738767	0.703271	0.794305	0.692308
520	0.945093	0.736677	0.718458	0.797677	0.697185
530	0.946262	0.742947	0.718458	0.8003	0.701438
540	0.946262	0.730408	0.71729	0.795429	0.694066
550	0.961449	0.737722	0.705607	0.799176	0.700298
560	0.943925	0.722048	0.720794	0.792806	0.690145
570	0.952103	0.727273	0.707944	0.793181	0.690839
580	0.953271	0.735632	0.711449	0.797677	0.697884
590	0.961449	0.727273	0.700935	0.79393	0.69238
600	0.953271	0.736677	0.700935	0.79468	0.692861
610	0.948598	0.738767	0.713785	0.798052	0.698123
620	0.966121	0.716823	0.723131	0.798801	0.699719
630	0.957944	0.722048	0.703271	0.791682	0.689136
640	0.953271	0.706374	0.695093	0.781941	0.674021
650	0.956776	0.725183	0.703271	0.792432	0.690039
660	0.954439	0.710554	0.706776	0.787561	0.68278
670	0.956776	0.716823	0.703271	0.789434	0.685188
680	0.945093	0.742947	0.702103	0.79468	0.693178
690	0.962617	0.719958	0.696262	0.790184	0.686913
700	0.966121	0.726228	0.711449	0.798426	0.699117
710	0.949766	0.707419	0.704439	0.784189	0.677203
720	0.950935	0.722048	0.714953	0.793181	0.690932
730	0.963785	0.704284	0.704439	0.787561	0.683082
740	0.953271	0.723093	0.718458	0.795429	0.694347
750	0.945093	0.725183	0.692757	0.785313	0.679063
760	0.950935	0.708464	0.691589	0.780817	0.672854
770	0.954439	0.728318	0.692757	0.789434	0.685777
780	0.949766	0.684431	0.711449	0.778194	0.668639
790	0.949766	0.712644	0.713785	0.78906	0.685306
800	0.954439	0.718913	0.698598	0.787936	0.683717
810	0.954439	0.707419	0.718458	0.790184	0.687097
820	0.950935	0.700104	0.702103	0.781191	0.672991
830	0.949766	0.711599	0.707944	0.786812	0.68143
840	0.955607	0.714734	0.71729	0.792806	0.690616
850	0.953271	0.728318	0.691589	0.788685	0.684894
860	0.957944	0.716823	0.71729	0.794305	0.69308
870	0.955607	0.69697	0.71729	0.786437	0.681257
880	0.949766	0.703239	0.712617	0.785313	0.679899
890	0.94743	0.706374	0.689252	0.778194	0.668537
900	0.945093	0.709509	0.707944	0.784564	0.678688
910	0.956776	0.69488	0.692757	0.778194	0.669293
920	0.943925	0.706374	0.686916	0.776321	0.666105
930	0.949766	0.69906	0.678738	0.772949	0.661244
940	0.948598	0.703239	0.698598	0.780442	0.672199
950	0.945093	0.715778	0.700935	0.784564	0.678022
960	0.942757	0.6907	0.688084	0.770701	0.657817
970	0.950935	0.702194	0.669393	0.77145	0.659322
980	0.942757	0.702194	0.695093	0.77707	0.667513
990	0.952103	0.69906	0.67757	0.773323	0.661966
1000	0.950935	0.69697	0.702103	0.780067	0.671908
1010	0.945093	0.6907	0.69743	0.774447	0.663103
1020	0.94743	0.700104	0.685748	0.774822	0.663881
1030	0.954439	0.702194	0.691589	0.779693	0.671668
1040	0.952103	0.712644	0.688084	0.781566	0.673957
1050	0.953271	0.714734	0.685748	0.781941	0.674532
1060	0.952103	0.691745	0.698598	0.777445	0.667944
1070	0.959112	0.728318	0.695093	0.791682	0.689431
1080	0.948598	0.713689	0.688084	0.780817	0.672838
1090	0.939252	0.704284	0.688084	0.774447	0.662957
1100	0.952103	0.708464	0.689252	0.780442	0.672517
1110	0.946262	0.693835	0.695093	0.775197	0.664603
1120	0.942757	0.69279	0.695093	0.773698	0.662029
1130	0.950935	0.726228	0.670561	0.780442	0.672637
1140	0.954439	0.701149	0.676402	0.774447	0.663638
1150	0.941589	0.712644	0.690421	0.778943	0.670011
1160	0.955607	0.684431	0.702103	0.77707	0.667919
1170	0.962617	0.721003	0.691589	0.78906	0.685698
1180	0.941589	0.706374	0.700935	0.780067	0.671713
1190	0.953271	0.712644	0.702103	0.786437	0.681119
1200	0.950935	0.69906	0.692757	0.777819	0.668445
1210	0.948598	0.698015	0.678738	0.772199	0.660088
1220	0.940421	0.695925	0.686916	0.77145	0.658883
1230	0.952103	0.689655	0.689252	0.773698	0.662476
1240	0.946262	0.69697	0.690421	0.774822	0.663942
1250	0.946262	0.723093	0.685748	0.78269	0.676031
1260	0.942757	0.701149	0.706776	0.780442	0.672276
1270	0.953271	0.685475	0.663551	0.764331	0.64914
1280	0.952103	0.69279	0.69743	0.777445	0.667754
1290	0.948598	0.689655	0.686916	0.771825	0.660037
1300	0.938084	0.712644	0.691589	0.778194	0.668887
1310	0.950935	0.702194	0.685748	0.776695	0.666604
1320	0.955607	0.701149	0.699766	0.782315	0.675641
1330	0.94743	0.6907	0.683411	0.770701	0.658223
1340	0.946262	0.69697	0.682243	0.772199	0.660448
1350	0.941589	0.695925	0.691589	0.773323	0.662036
1360	0.933411	0.685475	0.679907	0.763207	0.646887
1370	0.945093	0.687565	0.683411	0.768827	0.655024
1380	0.953271	0.695925	0.685748	0.775197	0.665269
1390	0.949766	0.69906	0.668224	0.769577	0.65592
1400	0.941589	0.706374	0.681075	0.773698	0.661937
1410	0.943925	0.705329	0.682243	0.774447	0.662925
1420	0.941589	0.69488	0.665888	0.764706	0.649203
1430	0.946262	0.700104	0.676402	0.77145	0.659488
1440	0.955607	0.683386	0.683411	0.770701	0.658311
1450	0.948598	0.703239	0.686916	0.776695	0.666813
1460	0.942757	0.702194	0.681075	0.772574	0.660626
1470	0.940421	0.689655	0.65771	0.759835	0.641577
1480	0.938084	0.69488	0.67757	0.767329	0.652932
1490	0.950935	0.6907	0.663551	0.765455	0.650817
1500	0.946262	0.683386	0.660047	0.76021	0.642967
1510	0.949766	0.668757	0.67757	0.761709	0.644949
1520	0.936916	0.69488	0.669393	0.764331	0.648649
1530	0.949766	0.68861	0.672897	0.767329	0.653964
1540	0.943925	0.69906	0.676402	0.770326	0.657345
1550	0.946262	0.69906	0.682243	0.772949	0.661545
1560	0.943925	0.684431	0.661215	0.76021	0.64315
1570	0.946262	0.682341	0.668224	0.762458	0.64612
1580	0.948598	0.679206	0.676402	0.764706	0.649454
1590	0.942757	0.678161	0.661215	0.757587	0.638849
1600	0.936916	0.681296	0.695093	0.767703	0.653567
1610	0.952103	0.685475	0.661215	0.763207	0.647343
1620	0.948598	0.714734	0.663551	0.773323	0.661908
1630	0.939252	0.687565	0.69743	0.77145	0.658988
1640	0.949766	0.69697	0.669393	0.769202	0.656095
1650	0.939252	0.69697	0.67757	0.768453	0.655151
1660	0.94743	0.698015	0.671729	0.769577	0.656557
1670	0.950935	0.681296	0.672897	0.765081	0.650124
1680	0.941589	0.681296	0.665888	0.759835	0.642196
1690	0.931075	0.701149	0.643692	0.756463	0.637175
1700	0.94743	0.664577	0.682243	0.760959	0.644073
1710	0.935748	0.673981	0.656542	0.752342	0.631066
1720	0.946262	0.661442	0.647196	0.74822	0.625108
1730	0.941589	0.69906	0.658879	0.763957	0.648088
1740	0.956776	0.6907	0.650701	0.763207	0.64756
1750	0.942757	0.6907	0.672897	0.76583	0.6512
1760	0.948598	0.687565	0.672897	0.766579	0.651849
1770	0.929907	0.684431	0.663551	0.756463	0.636546
1780	0.938084	0.68652	0.671729	0.762458	0.645884
1790	0.943925	0.69488	0.650701	0.760584	0.643478
1800	0.945093	0.68861	0.653037	0.75946	0.641793
1810	0.941589	0.698015	0.658879	0.763582	0.647769
1820	0.945093	0.707419	0.671729	0.772199	0.660996
1830	0.935748	0.68652	0.667056	0.76021	0.642672
1840	0.946262	0.682341	0.63785	0.752716	0.631643
1850	0.92757	0.68652	0.66472	0.756838	0.637229
1860	0.935748	0.682341	0.639019	0.749719	0.626848
1870	0.942757	0.678161	0.653037	0.754964	0.635121
1880	0.931075	0.669801	0.642523	0.744848	0.619503
1890	0.940421	0.685475	0.653037	0.756838	0.638326
1900	0.935748	0.6907	0.649533	0.756088	0.636977
1910	0.94743	0.683386	0.656542	0.75946	0.641663
1920	0.941589	0.698015	0.662383	0.764706	0.649926
1930	0.948598	0.689655	0.629673	0.753466	0.633039
1940	0.940421	0.6907	0.66472	0.762458	0.64601
1950	0.942757	0.704284	0.651869	0.763957	0.648512
1960	0.936916	0.684431	0.655374	0.756088	0.636738
1970	0.931075	0.670846	0.66472	0.752342	0.630988
1980	0.938084	0.706374	0.661215	0.766205	0.650973
1990	0.940421	0.705329	0.662383	0.766954	0.652884
2000	0.935748	0.672936	0.65771	0.752342	0.631103
2010	0.925234	0.670846	0.643692	0.743724	0.617998
2020	0.934579	0.673981	0.655374	0.751592	0.629757
2030	0.929907	0.680251	0.640187	0.747471	0.624269
2040	0.936916	0.663532	0.651869	0.747471	0.624209
2050	0.919393	0.682341	0.662383	0.751967	0.629789
2060	0.935748	0.687565	0.651869	0.755714	0.635973
2070	0.928738	0.684431	0.647196	0.750843	0.628788
2080	0.938084	0.682341	0.656542	0.756088	0.636662
2090	0.943925	0.678161	0.682243	0.764706	0.650074
2100	0.922897	0.685475	0.656542	0.752342	0.630404
2110	0.926402	0.693835	0.681075	0.764331	0.648354
2120	0.940421	0.666667	0.641355	0.746347	0.622238
2130	0.934579	0.679206	0.630841	0.745598	0.621851
2140	0.931075	0.673981	0.665888	0.75384	0.633301
2150	0.932243	0.682341	0.669393	0.758336	0.639517
2160	0.946262	0.691745	0.654206	0.761334	0.645315
2170	0.946262	0.681296	0.660047	0.75946	0.642232
2180	0.931075	0.675026	0.648364	0.748595	0.624693
2190	0.935748	0.69488	0.634346	0.752716	0.631852
2200	0.936916	0.677116	0.665888	0.756838	0.637725
2210	0.940421	0.684431	0.635514	0.750843	0.629413
2220	0.939252	0.672936	0.655374	0.752716	0.631499
2230	0.933411	0.673981	0.646028	0.74822	0.625094
2240	0.932243	0.662487	0.665888	0.750094	0.627598
2250	0.92757	0.69488	0.660047	0.758336	0.639643
2260	0.920561	0.669801	0.636682	0.739603	0.611578
2270	0.929907	0.660397	0.642523	0.741102	0.615179
2280	0.935748	0.677116	0.660047	0.75459	0.635204
2290	0.935748	0.666667	0.670561	0.754215	0.633523
2300	0.938084	0.68652	0.654206	0.756838	0.637645
2310	0.932243	0.683386	0.643692	0.750468	0.628373
2320	0.920561	0.69488	0.663551	0.757212	0.637923
2330	0.933411	0.687565	0.628505	0.747471	0.624254
2340	0.942757	0.677116	0.649533	0.753466	0.633053
2350	0.922897	0.659352	0.633178	0.735481	0.605804
2360	0.928738	0.685475	0.668224	0.757962	0.63924
2370	0.928738	0.660397	0.650701	0.74335	0.617643
2380	0.94743	0.677116	0.655374	0.756838	0.638212
2390	0.925234	0.685475	0.65771	0.753466	0.632795
2400	0.924065	0.683386	0.64486	0.74822	0.62451
2410	0.931075	0.659352	0.63785	0.739603	0.612497
2420	0.945093	0.679206	0.662383	0.759086	0.641709
2430	0.922897	0.661442	0.623832	0.733233	0.603288
2440	0.935748	0.669801	0.651869	0.749344	0.626655
2450	0.936916	0.663532	0.640187	0.743724	0.619155
2460	0.924065	0.656217	0.620327	0.730611	0.599053
2470	0.934579	0.671891	0.648364	0.748595	0.625654
2480	0.910047	0.69488	0.641355	0.746722	0.622491
2490	0.929907	0.658307	0.630841	0.736605	0.6075
2500	0.941589	0.69906	0.648364	0.760584	0.643476
2510	0.936916	0.664577	0.635514	0.7426	0.617054
2520	0.926402	0.670846	0.646028	0.744848	0.620138
2530	0.904206	0.654127	0.640187	0.729861	0.596988
2540	0.928738	0.645768	0.646028	0.736605	0.607664
2550	0.924065	0.669801	0.627336	0.737729	0.609895
2560	0.928738	0.670846	0.641355	0.744099	0.618792
2570	0.926402	0.670846	0.639019	0.7426	0.616882
2580	0.932243	0.68652	0.621495	0.744474	0.619892
2590	0.921729	0.664577	0.630841	0.736231	0.606997
2600	0.934579	0.689655	0.609813	0.7426	0.617671
2610	0.942757	0.673981	0.628505	0.745598	0.621963
2620	0.925234	0.671891	0.643692	0.744099	0.61839
2630	0.915888	0.648903	0.627336	0.727613	0.594187
2640	0.935748	0.672936	0.64486	0.74822	0.625048
2650	0.931075	0.669801	0.617991	0.73698	0.608876
2660	0.920561	0.665622	0.621495	0.733233	0.602614
2670	0.933411	0.660397	0.655374	0.746347	0.622337
2680	0.938084	0.666667	0.651869	0.74897	0.627028
2690	0.932243	0.657262	0.635514	0.738479	0.61081
2700	0.919393	0.683386	0.636682	0.744099	0.618946
2710	0.92757	0.670846	0.643692	0.744474	0.619469
2720	0.92757	0.671891	0.626168	0.739228	0.612126
2730	0.929907	0.655172	0.619159	0.731735	0.601284
2740	0.940421	0.671891	0.655374	0.752716	0.632383
2750	0.91472	0.69488	0.651869	0.751592	0.629726
2760	0.933411	0.668757	0.617991	0.737355	0.609677
2770	0.931075	0.663532	0.655374	0.746722	0.623262
2780	0.924065	0.668757	0.621495	0.735481	0.606042
2790	0.929907	0.672936	0.634346	0.742975	0.617178
2800	0.919393	0.662487	0.643692	0.738854	0.610727
2810	0.934579	0.658307	0.639019	0.740727	0.614606
2820	0.933411	0.659352	0.622664	0.735481	0.606281
2830	0.933411	0.673981	0.622664	0.740727	0.614489
2840	0.931075	0.672936	0.633178	0.742975	0.617536
2850	0.920561	0.659352	0.65771	0.7426	0.616753
2860	0.919393	0.677116	0.662383	0.750094	0.627422
2870	0.941589	0.665622	0.651869	0.749719	0.627814
2880	0.915888	0.657262	0.633178	0.732484	0.602003
2890	0.925234	0.669801	0.617991	0.735107	0.606062
2900	0.924065	0.678161	0.606308	0.733983	0.604539
2910	0.920561	0.668757	0.630841	0.737355	0.608463
2920	0.919393	0.660397	0.646028	0.738854	0.610838
2930	0.913551	0.682341	0.628505	0.739228	0.611454
2940	0.928738	0.676071	0.634346	0.743724	0.618508
2950	0.918224	0.645768	0.614486	0.723117	0.587814
2960	0.928738	0.668757	0.622664	0.737355	0.60964
2970	0.918224	0.655172	0.632009	0.732109	0.601
2980	0.920561	0.672936	0.633178	0.739603	0.612334
2990	0.918224	0.657262	0.625	0.730611	0.598934
3000	0.925234	0.665622	0.626168	0.736231	0.607421
3010	0.91472	0.652038	0.64486	0.733983	0.603673
3020	0.918224	0.661442	0.635514	0.735481	0.605937
3030	0.911215	0.645768	0.650701	0.732484	0.60152
3040	0.915888	0.684431	0.606308	0.733608	0.603606
3050	0.928738	0.672936	0.647196	0.746722	0.623331
3060	0.915888	0.665622	0.626168	0.733233	0.60277
3070	0.921729	0.653083	0.61215	0.726115	0.592486
3080	0.924065	0.663532	0.60514	0.728363	0.59624
3090	0.915888	0.661442	0.633178	0.733983	0.603564
3100	0.931075	0.664577	0.630841	0.739228	0.612419
3110	0.91472	0.667712	0.643692	0.739228	0.611222
3120	0.926402	0.654127	0.607477	0.726489	0.593832
3130	0.920561	0.667712	0.643692	0.741102	0.615009
3140	0.921729	0.657262	0.634346	0.734732	0.60457
3150	0.90771	0.668757	0.628505	0.732484	0.602212
3160	0.92757	0.649948	0.634346	0.733983	0.604002
3170	0.925234	0.645768	0.60514	0.722368	0.587339
3180	0.917056	0.641588	0.607477	0.718996	0.581459
3190	0.912383	0.6907	0.619159	0.738854	0.610603
3200	0.91472	0.654127	0.64486	0.734732	0.60419
3210	0.913551	0.668757	0.626168	0.733608	0.603106
3220	0.925234	0.658307	0.616822	0.730611	0.600032
3230	0.919393	0.664577	0.607477	0.727988	0.595509
3240	0.912383	0.683386	0.615654	0.735107	0.605703
3250	0.925234	0.666667	0.608645	0.730985	0.600174
3260	0.912383	0.663532	0.622664	0.730236	0.597738
3270	0.924065	0.656217	0.627336	0.732859	0.602131
3280	0.906542	0.644723	0.621495	0.721244	0.584597
3290	0.919393	0.670846	0.617991	0.733608	0.604199
3300	0.901869	0.642633	0.608645	0.714874	0.574929
3310	0.921729	0.682341	0.630841	0.7426	0.616647
3320	0.903037	0.675026	0.615654	0.729112	0.59697
3330	0.90771	0.647858	0.622664	0.723117	0.58788
3340	0.900701	0.655172	0.626168	0.724616	0.589735
3350	0.920561	0.657262	0.620327	0.729861	0.59832
3360	0.915888	0.661442	0.625	0.73136	0.599694
3370	0.928738	0.657262	0.620327	0.732484	0.60236
3380	0.911215	0.668757	0.632009	0.734732	0.604813
3390	0.910047	0.68652	0.616822	0.735856	0.607097
3400	0.922897	0.648903	0.630841	0.730985	0.60018
3410	0.90771	0.654127	0.626168	0.726489	0.592337
3420	0.939252	0.663532	0.620327	0.738104	0.610914
3430	0.918224	0.637409	0.613318	0.719745	0.583598
3440	0.918224	0.675026	0.594626	0.727239	0.594506
3450	0.913551	0.644723	0.58528	0.711877	0.572008
3460	0.910047	0.656217	0.60514	0.721244	0.585266
3470	0.924065	0.654127	0.608645	0.726115	0.59304
3480	0.904206	0.666667	0.635514	0.732859	0.601506
3490	0.925234	0.676071	0.621495	0.738479	0.610192
3500	0.90771	0.655172	0.629673	0.727988	0.594834
3510	0.91472	0.660397	0.614486	0.727239	0.593754
3520	0.91472	0.679206	0.629673	0.738854	0.611559
3530	0.910047	0.650993	0.60514	0.719371	0.582712
3540	0.913551	0.652038	0.608645	0.721993	0.586725
3550	0.920561	0.666667	0.614486	0.73136	0.600357
3560	0.90771	0.637409	0.623832	0.719745	0.582794
3570	0.903037	0.661442	0.594626	0.717497	0.579458
3580	0.91472	0.663532	0.614486	0.728363	0.596013
3590	0.904206	0.668757	0.603972	0.723492	0.588305
3600	0.910047	0.639498	0.621495	0.720495	0.584094
3610	0.913551	0.680251	0.635514	0.740727	0.613795
3620	0.913551	0.650993	0.614486	0.723492	0.589096
3630	0.917056	0.662487	0.61215	0.727988	0.596342
3640	0.926402	0.656217	0.629673	0.734357	0.605658
3650	0.921729	0.662487	0.610981	0.729112	0.597333
3660	0.908879	0.646813	0.615654	0.720869	0.584653
3670	0.92757	0.664577	0.613318	0.732484	0.602256
3680	0.920561	0.665622	0.600467	0.726489	0.593113
3690	0.922897	0.654127	0.616822	0.728363	0.596173
3700	0.898364	0.668757	0.595794	0.718996	0.581508
3710	0.911215	0.667712	0.616822	0.729487	0.597834
3720	0.91472	0.657262	0.603972	0.722743	0.588819
3730	0.905374	0.667712	0.599299	0.721993	0.587121
3740	0.91472	0.659352	0.603972	0.723492	0.588888
3750	0.899533	0.645768	0.615654	0.717497	0.578884
3760	0.918224	0.654127	0.629673	0.730985	0.599584
3770	0.917056	0.638454	0.617991	0.721244	0.58581
3780	0.919393	0.657262	0.615654	0.727988	0.595472
3790	0.90771	0.657262	0.606308	0.721244	0.585792
3800	0.913551	0.663532	0.607477	0.72574	0.591976
3810	0.913551	0.658307	0.617991	0.727239	0.594553
3820	0.910047	0.635319	0.617991	0.717872	0.579986
3830	0.913551	0.664577	0.600467	0.723867	0.58908
3840	0.924065	0.644723	0.602804	0.720869	0.584739
3850	0.910047	0.657262	0.602804	0.720869	0.585257
3860	0.910047	0.662487	0.632009	0.732109	0.601324
3870	0.898364	0.652038	0.619159	0.720495	0.584198
3880	0.918224	0.667712	0.625	0.734357	0.605675
3890	0.90771	0.649948	0.603972	0.717872	0.580722
3900	0.905374	0.655172	0.613318	0.721993	0.587022
3910	0.901869	0.657262	0.600467	0.717497	0.580001
3920	0.900701	0.648903	0.634346	0.724991	0.590508
3930	0.89486	0.645768	0.616822	0.716373	0.5772
3940	0.912383	0.632184	0.607477	0.714125	0.574384
3950	0.911215	0.659352	0.599299	0.720869	0.585271
3960	0.893692	0.643678	0.602804	0.710753	0.568529
3970	0.897196	0.666667	0.610981	0.722743	0.587677
3980	0.911215	0.665622	0.607477	0.72574	0.591733
3990	0.900701	0.654127	0.575935	0.70813	0.565419
4000	0.906542	0.644723	0.588785	0.710753	0.570178
4010	0.901869	0.661442	0.602804	0.719745	0.582843
4020	0.903037	0.657262	0.601636	0.718247	0.580344
4030	0.893692	0.657262	0.626168	0.723117	0.587031
4040	0.913551	0.653083	0.614486	0.724241	0.589757
4050	0.915888	0.649948	0.589953	0.715999	0.577549
4060	0.899533	0.660397	0.610981	0.721244	0.584834
4070	0.896028	0.653083	0.593458	0.711877	0.570857
4080	0.911215	0.650993	0.610981	0.721619	0.586298
4090	0.904206	0.641588	0.570093	0.702885	0.557585
4100	0.905374	0.650993	0.613318	0.720495	0.583565
4110	0.900701	0.662487	0.60514	0.720495	0.584702
4120	0.90771	0.658307	0.608645	0.722368	0.587455
4130	0.90771	0.660397	0.613318	0.724616	0.590272
4140	0.912383	0.662487	0.586449	0.718247	0.581635
4150	0.904206	0.659352	0.587617	0.714874	0.576256
4160	0.904206	0.657262	0.609813	0.721244	0.584792
4170	0.926402	0.661442	0.599299	0.726489	0.593584
4180	0.908879	0.661442	0.591121	0.718247	0.581594
4190	0.913551	0.659352	0.61215	0.72574	0.591841
4200	0.913551	0.655172	0.616822	0.72574	0.59175
4210	0.929907	0.652038	0.600467	0.724616	0.5905
4220	0.910047	0.668757	0.593458	0.721993	0.586996
4230	0.912383	0.639498	0.607477	0.716748	0.57835
4240	0.90771	0.640543	0.641355	0.726489	0.592903
4250	0.911215	0.646813	0.620327	0.723117	0.587872
4260	0.89486	0.645768	0.599299	0.710753	0.569243
4270	0.915888	0.662487	0.609813	0.726864	0.593959
4280	0.906542	0.646813	0.607477	0.717497	0.579449
4290	0.903037	0.677116	0.60514	0.726489	0.592863
4300	0.896028	0.667712	0.626168	0.727613	0.593876
4310	0.910047	0.647858	0.58528	0.711877	0.571413
4320	0.929907	0.655172	0.575935	0.717872	0.581359
4330	0.912383	0.649948	0.610981	0.721619	0.586298
4340	0.912383	0.662487	0.614486	0.727239	0.594742
4350	0.912383	0.650993	0.607477	0.720869	0.58507
4360	0.903037	0.637409	0.606308	0.712626	0.572595
4370	0.898364	0.660397	0.591121	0.7145	0.57508
4380	0.903037	0.664577	0.615654	0.725365	0.590852
4390	0.90771	0.647858	0.599299	0.715624	0.577421
4400	0.911215	0.659352	0.598131	0.720495	0.584008
4410	0.898364	0.656217	0.571262	0.706632	0.563381
4420	0.892523	0.647858	0.601636	0.711502	0.56965
4430	0.891355	0.659352	0.59229	0.712252	0.571337
4440	0.929907	0.646813	0.609813	0.72574	0.59281
4450	0.917056	0.673981	0.616822	0.733608	0.604073
4460	0.900701	0.629049	0.578271	0.699888	0.55349
4470	0.911215	0.649948	0.613318	0.721993	0.587152
4480	0.896028	0.635319	0.586449	0.70326	0.558429
4490	0.88785	0.645768	0.608645	0.711502	0.570386
4500	0.90771	0.635319	0.615654	0.716373	0.577784
4510	0.906542	0.673981	0.61215	0.728737	0.596148
4520	0.905374	0.676071	0.588785	0.721619	0.586264
4530	0.910047	0.638454	0.59229	0.710753	0.569962
4540	0.919393	0.645768	0.563084	0.707006	0.565808
4550	0.90771	0.645768	0.596963	0.714125	0.574949
4560	0.905374	0.672936	0.601636	0.724616	0.590118
4570	0.908879	0.652038	0.589953	0.7145	0.575646
4580	0.900701	0.645768	0.593458	0.710753	0.569859
4590	0.919393	0.654127	0.577103	0.7145	0.575705
4600	0.918224	0.630094	0.59229	0.710378	0.569716
4610	0.904206	0.643678	0.609813	0.716373	0.577938
4620	0.898364	0.654127	0.582944	0.709629	0.567958
4630	0.893692	0.625914	0.602804	0.704384	0.55996
4640	0.886682	0.664577	0.608645	0.717872	0.579939
4650	0.898364	0.653083	0.602804	0.715624	0.575838
4660	0.904206	0.649948	0.584112	0.710378	0.569274
4670	0.892523	0.636364	0.587617	0.702885	0.557559
4680	0.91472	0.653083	0.586449	0.715624	0.57728
4690	0.906542	0.649948	0.579439	0.709629	0.568346
4700	0.900701	0.643678	0.574766	0.704009	0.560252
4710	0.893692	0.652038	0.600467	0.713001	0.572491
4720	0.89486	0.644723	0.59229	0.70813	0.565811
4730	0.915888	0.655172	0.598131	0.720495	0.584448
4740	0.900701	0.650993	0.578271	0.707756	0.565601
4750	0.899533	0.648903	0.586449	0.709254	0.567239
4760	0.891355	0.662487	0.586449	0.711502	0.571003
4770	0.900701	0.666667	0.610981	0.723867	0.58869
4780	0.910047	0.657262	0.591121	0.717123	0.58008
4790	0.903037	0.675026	0.58528	0.719371	0.582811
4800	0.919393	0.655172	0.606308	0.724241	0.590316
4810	0.896028	0.641588	0.588785	0.706257	0.563389
4820	0.898364	0.654127	0.598131	0.7145	0.575897
4830	0.891355	0.649948	0.574766	0.70326	0.558437
4840	0.885514	0.654127	0.589953	0.707756	0.564856
4850	0.891355	0.631139	0.598131	0.704009	0.559111
4860	0.905374	0.638454	0.61215	0.715624	0.577438
4870	0.892523	0.652038	0.580607	0.706257	0.562782
4880	0.896028	0.640543	0.57243	0.700637	0.555499
4890	0.876168	0.655172	0.581776	0.70251	0.55622
4900	0.898364	0.645768	0.575935	0.704384	0.560673
4910	0.89486	0.662487	0.587617	0.713001	0.572926
4920	0.912383	0.653083	0.564252	0.707756	0.565168
4930	0.911215	0.667712	0.580607	0.717872	0.581643
4940	0.884346	0.643678	0.575935	0.699138	0.55186
4950	0.892523	0.658307	0.610981	0.718247	0.58091
4960	0.896028	0.646813	0.602804	0.712626	0.572389
4970	0.908879	0.657262	0.568925	0.709629	0.568314
4980	0.898364	0.633229	0.577103	0.700262	0.554064
4990	0.903037	0.658307	0.57243	0.709254	0.567466
5000	0.898364	0.641588	0.573598	0.702136	0.557056
5010	0.905374	0.641588	0.594626	0.711128	0.571101
5020	0.899533	0.642633	0.598131	0.710753	0.569859
5030	0.886682	0.650993	0.609813	0.713376	0.573582
5040	0.897196	0.657262	0.59229	0.713376	0.573657
5050	0.891355	0.654127	0.575935	0.705133	0.561146
5060	0.901869	0.641588	0.60514	0.713376	0.573431
5070	0.89486	0.638454	0.558411	0.695017	0.547317
5080	0.883178	0.666667	0.591121	0.711877	0.570929
5090	0.906542	0.667712	0.591121	0.719745	0.58352
5100	0.884346	0.659352	0.581776	0.706632	0.562994
5110	0.904206	0.659352	0.589953	0.715624	0.578006
5120	0.885514	0.650993	0.575935	0.702136	0.556202
5130	0.912383	0.653083	0.540888	0.700262	0.554491
5140	0.89486	0.643678	0.593458	0.70813	0.566394
5150	0.891355	0.643678	0.586449	0.704758	0.560576
5160	0.900701	0.655172	0.565421	0.705133	0.562069
5170	0.893692	0.637409	0.603972	0.70888	0.566817
5180	0.904206	0.656217	0.601636	0.718247	0.58075
5190	0.893692	0.664577	0.588785	0.71375	0.573896
5200	0.896028	0.649948	0.588785	0.709254	0.568114
5210	0.908879	0.653083	0.578271	0.711128	0.570971
5220	0.905374	0.645768	0.598131	0.71375	0.574161
5230	0.89486	0.641588	0.560748	0.69689	0.550229
5240	0.89486	0.642633	0.606308	0.711877	0.571279
5250	0.899533	0.669801	0.588785	0.717497	0.579582
5260	0.890187	0.655172	0.584112	0.707756	0.564472
5270	0.896028	0.632184	0.565421	0.695392	0.546954
5280	0.905374	0.639498	0.58528	0.707381	0.564918
5290	0.891355	0.640543	0.586449	0.703634	0.55837
5300	0.899533	0.653083	0.565421	0.704009	0.559168
5310	0.885514	0.633229	0.598131	0.702885	0.557776
5320	0.899533	0.643678	0.57243	0.702885	0.557584
5330	0.900701	0.656217	0.566589	0.705882	0.563086
5340	0.88785	0.646813	0.563084	0.697265	0.549825
5350	0.905374	0.654127	0.580607	0.711128	0.570818
5360	0.904206	0.637409	0.625	0.718996	0.581647
5370	0.884346	0.656217	0.595794	0.710004	0.568083
5380	0.891355	0.642633	0.579439	0.702136	0.556909
5390	0.89486	0.639498	0.591121	0.705882	0.562521
5400	0.900701	0.658307	0.587617	0.713376	0.57407
5410	0.89486	0.634274	0.584112	0.701761	0.55623
5420	0.908879	0.645768	0.577103	0.70813	0.566223
5430	0.88785	0.638454	0.578271	0.699138	0.552358
5440	0.90771	0.644723	0.582944	0.709254	0.567866
5450	0.884346	0.640543	0.578271	0.698764	0.552357
5460	0.896028	0.667712	0.574766	0.711128	0.570339
5470	0.892523	0.626959	0.581776	0.69764	0.550276
5480	0.891355	0.637409	0.596963	0.705882	0.561799
5490	0.893692	0.649948	0.570093	0.70251	0.557561
5500	0.912383	0.650993	0.609813	0.721619	0.586735
5510	0.910047	0.672936	0.58528	0.720869	0.5855
5520	0.904206	0.637409	0.573598	0.70251	0.557896
5530	0.872664	0.643678	0.538551	0.683402	0.528219
5540	0.893692	0.650993	0.568925	0.70251	0.5573
5550	0.885514	0.646813	0.589953	0.705133	0.560844
5560	0.858645	0.661442	0.568925	0.695017	0.545345
5570	0.891355	0.642633	0.573598	0.700262	0.554328
5580	0.885514	0.640543	0.580607	0.699888	0.553052
5590	0.882009	0.639498	0.586449	0.700262	0.554125
5600	0.901869	0.654127	0.595794	0.714874	0.576625
5610	0.882009	0.660397	0.553738	0.697265	0.549232
5620	0.896028	0.629049	0.601636	0.705882	0.561968
5630	0.885514	0.62069	0.594626	0.697265	0.549425
5640	0.885514	0.665622	0.587617	0.711128	0.570324
5650	0.89486	0.624869	0.566589	0.692769	0.542823
5660	0.882009	0.645768	0.57243	0.698014	0.549723
5670	0.872664	0.646813	0.571262	0.695017	0.545734
5680	0.892523	0.633229	0.580607	0.699513	0.553497
5690	0.884346	0.658307	0.586449	0.707756	0.565439
5700	0.889019	0.635319	0.58528	0.700637	0.554801
5710	0.890187	0.643678	0.578271	0.701761	0.556091
5720	0.900701	0.645768	0.573598	0.704384	0.561198
5730	0.891355	0.650993	0.59229	0.709254	0.567534
5740	0.904206	0.647858	0.55257	0.699513	0.554065
5750	0.918224	0.648903	0.581776	0.71375	0.574842
5760	0.893692	0.652038	0.568925	0.702885	0.558178
5770	0.869159	0.646813	0.57243	0.694268	0.544211
5780	0.892523	0.650993	0.565421	0.701012	0.555168
5790	0.882009	0.631139	0.571262	0.692394	0.542314
5800	0.88785	0.634274	0.594626	0.702885	0.557667
5810	0.900701	0.638454	0.595794	0.70888	0.567162
5820	0.880841	0.646813	0.554907	0.692394	0.542434
5830	0.893692	0.636364	0.567757	0.69689	0.549113
5840	0.912383	0.649948	0.579439	0.711502	0.571136
5850	0.89486	0.632184	0.57243	0.697265	0.549539
5860	0.870327	0.656217	0.578271	0.699888	0.552849
5870	0.896028	0.642633	0.584112	0.705133	0.561527
5880	0.88785	0.652038	0.565421	0.699888	0.554069
5890	0.875	0.644723	0.586449	0.699888	0.552533
5900	0.878505	0.633229	0.573598	0.692769	0.542508
5910	0.883178	0.659352	0.556075	0.698014	0.551023
5920	0.886682	0.637409	0.580607	0.699138	0.552339
5930	0.869159	0.648903	0.565421	0.692769	0.54236
5940	0.89486	0.654127	0.577103	0.706632	0.563988
5950	0.889019	0.655172	0.586449	0.70813	0.565523
5960	0.898364	0.632184	0.557243	0.693518	0.54425
5970	0.886682	0.637409	0.565421	0.694268	0.545625
5980	0.905374	0.644723	0.570093	0.704384	0.561227
5990	0.878505	0.645768	0.566589	0.695017	0.545706
6000	0.879673	0.639498	0.58528	0.699138	0.551979
6010	0.877336	0.615465	0.595794	0.693143	0.54237
6020	0.892523	0.636364	0.556075	0.692769	0.543418
6030	0.877336	0.639498	0.563084	0.69127	0.541507
6040	0.905374	0.665622	0.567757	0.711128	0.571058
6050	0.883178	0.650993	0.580607	0.702885	0.557992
6060	0.905374	0.642633	0.558411	0.699888	0.553814
6070	0.886682	0.656217	0.57243	0.70326	0.557937
6080	0.880841	0.652038	0.568925	0.698764	0.551779
6090	0.890187	0.668757	0.584112	0.712626	0.571693
6100	0.884346	0.629049	0.563084	0.689771	0.538943
6110	0.880841	0.632184	0.568925	0.691645	0.540966
6120	0.885514	0.638454	0.587617	0.701386	0.555045
6130	0.912383	0.650993	0.542056	0.699888	0.555662
6140	0.886682	0.61442	0.575935	0.689397	0.538143
6150	0.882009	0.631139	0.591121	0.698764	0.551285
6160	0.885514	0.642633	0.560748	0.694268	0.545127
6170	0.88785	0.658307	0.561916	0.701012	0.556126
6180	0.864486	0.662487	0.550234	0.69127	0.54032
6190	0.886682	0.624869	0.573598	0.692394	0.542657
6200	0.878505	0.639498	0.557243	0.689771	0.538713
6210	0.898364	0.641588	0.567757	0.700262	0.554437
6220	0.875	0.657262	0.544393	0.690895	0.540595
6230	0.867991	0.631139	0.573598	0.688647	0.536501
6240	0.897196	0.662487	0.551402	0.702136	0.558166
6250	0.878505	0.638454	0.559579	0.690146	0.539739
6260	0.900701	0.647858	0.557243	0.699888	0.554345
6270	0.896028	0.644723	0.578271	0.704009	0.559738
6280	0.886682	0.630094	0.563084	0.690895	0.540065
6290	0.880841	0.634274	0.574766	0.694268	0.544973
6300	0.877336	0.626959	0.561916	0.686399	0.53346
6310	0.890187	0.649948	0.567757	0.700637	0.555532
6320	0.875	0.652038	0.568925	0.69689	0.549104
6330	0.884346	0.636364	0.540888	0.685275	0.532577
6340	0.885514	0.639498	0.560748	0.693143	0.543714
6350	0.88785	0.648903	0.586449	0.705508	0.561705
6360	0.913551	0.642633	0.568925	0.705882	0.563892
6370	0.880841	0.62278	0.542056	0.679655	0.523119
6380	0.882009	0.61233	0.557243	0.681154	0.525476
6390	0.890187	0.636364	0.551402	0.690521	0.540479
6400	0.882009	0.659352	0.577103	0.704384	0.5604
6410	0.878505	0.62278	0.545561	0.68003	0.52401
6420	0.889019	0.637409	0.571262	0.69689	0.549058
6430	0.891355	0.654127	0.567757	0.70251	0.55857
6440	0.897196	0.623824	0.568925	0.693893	0.54509
6450	0.893692	0.669801	0.545561	0.701761	0.557063
6460	0.877336	0.648903	0.558411	0.693143	0.543293
6470	0.882009	0.633229	0.560748	0.689771	0.537972
6480	0.877336	0.628004	0.537383	0.678906	0.522507
6490	0.886682	0.635319	0.57243	0.695766	0.547349
6500	0.890187	0.631139	0.579439	0.69764	0.550232
6510	0.893692	0.633229	0.570093	0.696516	0.54809
6520	0.878505	0.643678	0.571262	0.695766	0.54755
6530	0.880841	0.635319	0.551402	0.687149	0.534704
6540	0.879673	0.652038	0.577103	0.701012	0.555031
6550	0.89486	0.660397	0.57243	0.707381	0.565136
6560	0.878505	0.660397	0.568925	0.701012	0.55533
6570	0.88785	0.656217	0.563084	0.700637	0.555489
6580	0.883178	0.647858	0.550234	0.692019	0.542059
6590	0.88785	0.632184	0.589953	0.700637	0.554778
6600	0.877336	0.633229	0.579439	0.694268	0.545403
6610	0.884346	0.629049	0.558411	0.688273	0.536487
6620	0.875	0.646813	0.582944	0.699513	0.552613
6630	0.886682	0.631139	0.550234	0.687149	0.535042
6640	0.886682	0.647858	0.554907	0.694642	0.545939
6650	0.873832	0.644723	0.542056	0.685275	0.532391
6660	0.883178	0.645768	0.571262	0.698014	0.551459
6670	0.882009	0.655172	0.586449	0.705882	0.562554
6680	0.876168	0.630094	0.536215	0.678906	0.522537
6690	0.873832	0.659352	0.55257	0.693893	0.544755
6700	0.875	0.644723	0.561916	0.692019	0.541329
6710	0.873832	0.640543	0.522196	0.677407	0.520318
6720	0.865654	0.649948	0.549065	0.686774	0.533808
6730	0.880841	0.655172	0.568925	0.699888	0.553578
6740	0.886682	0.623824	0.564252	0.689022	0.537794
6750	0.870327	0.623824	0.546729	0.678157	0.521559
6760	0.893692	0.644723	0.546729	0.693143	0.544179
6770	0.884346	0.637409	0.580607	0.698389	0.551264
6780	0.878505	0.642633	0.565421	0.693518	0.544095
6790	0.875	0.644723	0.547897	0.687523	0.535839
6800	0.882009	0.643678	0.570093	0.696516	0.548845
6810	0.890187	0.652038	0.551402	0.696141	0.548087
6820	0.878505	0.635319	0.544393	0.684151	0.529828
6830	0.889019	0.631139	0.564252	0.692394	0.542784
6840	0.882009	0.653083	0.567757	0.699138	0.552516
6850	0.896028	0.644723	0.546729	0.693893	0.545286
6860	0.870327	0.61651	0.561916	0.680405	0.524415
6870	0.873832	0.640543	0.553738	0.687523	0.53536
6880	0.872664	0.628004	0.574766	0.689397	0.537045
6890	0.875	0.638454	0.565421	0.690895	0.539804
6900	0.883178	0.644723	0.575935	0.699138	0.552649
6910	0.877336	0.653083	0.558411	0.694642	0.545547
6920	0.876168	0.635319	0.578271	0.694268	0.544001
6930	0.883178	0.629049	0.567757	0.690895	0.540631
6940	0.896028	0.601881	0.53271	0.674035	0.516285
6950	0.865654	0.652038	0.558411	0.690521	0.539445
6960	0.879673	0.61651	0.567757	0.685275	0.532463
6970	0.866822	0.648903	0.577103	0.695766	0.546821
6980	0.892523	0.61651	0.536215	0.679281	0.52378
6990	0.886682	0.628004	0.563084	0.690146	0.539871
7000	0.873832	0.626959	0.556075	0.683402	0.529605
7010	0.875	0.641588	0.549065	0.686774	0.534505
7020	0.872664	0.62278	0.563084	0.683777	0.529264
7030	0.872664	0.621735	0.557243	0.681529	0.526175
7040	0.876168	0.637409	0.53271	0.680405	0.524864
7050	0.879673	0.625914	0.57243	0.690146	0.538388
7060	0.873832	0.640543	0.554907	0.687898	0.536176
7070	0.886682	0.642633	0.580607	0.701012	0.555311
7080	0.877336	0.644723	0.55257	0.689771	0.538746
7090	0.875	0.641588	0.565421	0.692019	0.542016
7100	0.869159	0.638454	0.543224	0.681903	0.526025
7110	0.859813	0.628004	0.550234	0.677407	0.519494
7120	0.880841	0.625914	0.551402	0.683777	0.530095
7130	0.885514	0.641588	0.530374	0.684151	0.53078
7140	0.876168	0.639498	0.553738	0.687898	0.535373
7150	0.877336	0.636364	0.53972	0.682653	0.527767
7160	0.890187	0.635319	0.554907	0.69127	0.541935
7170	0.886682	0.638454	0.557243	0.692019	0.542711
7180	0.875	0.645768	0.536215	0.684151	0.530322
7190	0.876168	0.633229	0.545561	0.683027	0.529713
7200	0.86215	0.624869	0.557243	0.679281	0.52228
7210	0.866822	0.640543	0.560748	0.687523	0.534828
7220	0.869159	0.628004	0.549065	0.68003	0.524519
7230	0.875	0.643678	0.543224	0.68565	0.532368
7240	0.85514	0.637409	0.553738	0.680405	0.524434
7250	0.871495	0.624869	0.560748	0.683402	0.528251
7260	0.877336	0.635319	0.55257	0.686399	0.533419
7270	0.882009	0.644723	0.525701	0.682653	0.529467
7280	0.873832	0.639498	0.554907	0.687523	0.534889
7290	0.876168	0.625914	0.537383	0.677782	0.520603
7300	0.878505	0.645768	0.551402	0.690146	0.539177
7310	0.893692	0.62278	0.546729	0.685275	0.53372
7320	0.885514	0.648903	0.540888	0.690146	0.540707
7330	0.896028	0.641588	0.538551	0.690146	0.540391
7340	0.883178	0.631139	0.564252	0.690521	0.540207
7350	0.867991	0.646813	0.526869	0.679281	0.523188
7360	0.872664	0.638454	0.554907	0.686774	0.533753
7370	0.859813	0.634274	0.545561	0.678157	0.52101
7380	0.878505	0.642633	0.55257	0.689397	0.53845
7390	0.875	0.623824	0.55257	0.681529	0.526531
7400	0.871495	0.642633	0.563084	0.690521	0.539353
7410	0.869159	0.655172	0.553738	0.69127	0.541117
7420	0.870327	0.633229	0.556075	0.684526	0.530241
7430	0.884346	0.609195	0.545561	0.677033	0.520113
7440	0.883178	0.646813	0.553738	0.692769	0.54298
7450	0.858645	0.640543	0.566589	0.686774	0.533727
7460	0.891355	0.656217	0.546729	0.696516	0.550287
7470	0.867991	0.644723	0.554907	0.687523	0.534856
7480	0.863318	0.643678	0.538551	0.680405	0.524374
7490	0.872664	0.624869	0.542056	0.677782	0.519839
7500	0.867991	0.644723	0.554907	0.687523	0.534626
7510	0.878505	0.630094	0.573598	0.691645	0.541211
7520	0.867991	0.655172	0.559579	0.692769	0.542426
7530	0.900701	0.629049	0.537383	0.686774	0.534775
7540	0.879673	0.631139	0.546729	0.683777	0.530825
7550	0.871495	0.625914	0.564252	0.684901	0.53096
7560	0.867991	0.621735	0.536215	0.673286	0.513854
7570	0.859813	0.648903	0.563084	0.689022	0.536721
7580	0.866822	0.642633	0.535047	0.68003	0.523958
7590	0.866822	0.630094	0.57243	0.687523	0.534696
7600	0.869159	0.637409	0.551402	0.684151	0.529328
7610	0.879673	0.62278	0.563084	0.686025	0.53229
7620	0.871495	0.642633	0.53972	0.683027	0.529301
7630	0.871495	0.629049	0.564252	0.686025	0.533665
7640	0.882009	0.648903	0.553738	0.693143	0.544671
7650	0.856308	0.6186	0.542056	0.670288	0.508976
7660	0.848131	0.621735	0.544393	0.669539	0.507329
7670	0.863318	0.636364	0.546729	0.680405	0.524349
7680	0.885514	0.652038	0.536215	0.689771	0.539843
7690	0.866822	0.624869	0.558411	0.681154	0.525055
7700	0.869159	0.61651	0.559579	0.679281	0.522562
7710	0.863318	0.626959	0.57243	0.685275	0.530817
7720	0.859813	0.648903	0.545561	0.683402	0.528664
7730	0.893692	0.632184	0.559579	0.692769	0.543139
7740	0.858645	0.635319	0.554907	0.681154	0.525826
7750	0.875	0.629049	0.558411	0.685275	0.532331
7760	0.880841	0.641588	0.553738	0.690146	0.540175
7770	0.871495	0.648903	0.560748	0.692019	0.542284
7780	0.879673	0.615465	0.57243	0.686399	0.533643
7790	0.884346	0.639498	0.55257	0.690146	0.539523
7800	0.872664	0.603971	0.563084	0.677033	0.519305
7810	0.871495	0.645768	0.522196	0.678531	0.521835
7820	0.872664	0.637409	0.559579	0.687898	0.536048
7830	0.859813	0.625914	0.564252	0.681154	0.524836
7840	0.869159	0.633229	0.554907	0.683777	0.530057
7850	0.863318	0.630094	0.53271	0.673661	0.515367
7860	0.875	0.642633	0.588785	0.699888	0.55308
7870	0.869159	0.643678	0.564252	0.690521	0.538917
7880	0.873832	0.653083	0.546729	0.689771	0.538829
7890	0.878505	0.634274	0.536215	0.681154	0.525555
7900	0.883178	0.653083	0.547897	0.693143	0.544086
7910	0.850467	0.61651	0.526869	0.662795	0.498401
7920	0.875	0.628004	0.537383	0.678157	0.520726
7930	0.876168	0.6186	0.538551	0.675534	0.518554
7940	0.871495	0.636364	0.547897	0.683402	0.528748
7950	0.865654	0.647858	0.543224	0.684151	0.528815
7960	0.85514	0.641588	0.543224	0.678531	0.522102
7970	0.859813	0.649948	0.536215	0.680779	0.525212
7980	0.863318	0.639498	0.551402	0.683027	0.528836
7990	0.877336	0.631139	0.561916	0.687898	0.535953
8000	0.857477	0.633229	0.531542	0.672537	0.512721
8010	0.859813	0.626959	0.558411	0.679655	0.523119
8020	0.863318	0.657262	0.530374	0.682653	0.52761
8030	0.863318	0.658307	0.545561	0.687898	0.535451
8040	0.884346	0.630094	0.556075	0.687898	0.537007
8050	0.876168	0.635319	0.565421	0.690146	0.539799
8060	0.856308	0.640543	0.560748	0.684151	0.528876
8070	0.860981	0.654127	0.524533	0.678906	0.522768
8080	0.864486	0.628004	0.559579	0.681903	0.526044
8090	0.864486	0.62278	0.535047	0.672162	0.511983
8100	0.867991	0.666667	0.570093	0.700262	0.553716
8110	0.844626	0.630094	0.53271	0.667666	0.504686
8120	0.851636	0.640543	0.546729	0.678157	0.520998
8130	0.870327	0.637409	0.544393	0.682278	0.52706
8140	0.849299	0.636364	0.568925	0.683027	0.527772
8150	0.846963	0.639498	0.543224	0.675159	0.516523
8160	0.882009	0.645768	0.529206	0.684151	0.531028
8170	0.878505	0.619645	0.510514	0.667666	0.505774
8180	0.886682	0.629049	0.546729	0.685275	0.532678
8190	0.882009	0.637409	0.553738	0.689022	0.537549
8200	0.858645	0.629049	0.545561	0.675909	0.51732
8210	0.871495	0.641588	0.578271	0.695017	0.545662
8220	0.863318	0.637409	0.563084	0.686025	0.53189
8230	0.85514	0.624869	0.53972	0.671413	0.510807
8240	0.871495	0.625914	0.549065	0.68003	0.523527
8250	0.870327	0.644723	0.58528	0.698014	0.550735
8260	0.872664	0.638454	0.530374	0.678906	0.522465
8270	0.880841	0.624869	0.53271	0.677407	0.520267
8280	0.866822	0.635319	0.556075	0.684151	0.529961
8290	0.873832	0.61442	0.535047	0.672162	0.512552
8300	0.867991	0.648903	0.529206	0.680779	0.52557
8310	0.863318	0.628004	0.545561	0.677033	0.519275
8320	0.867991	0.630094	0.568925	0.686774	0.533583
8330	0.883178	0.625914	0.550234	0.684151	0.530951
8340	0.866822	0.652038	0.565421	0.693143	0.542985
8350	0.876168	0.62069	0.546729	0.678906	0.522839
8360	0.875	0.624869	0.566589	0.686399	0.533302
8370	0.869159	0.638454	0.537383	0.68003	0.523368
8380	0.858645	0.617555	0.554907	0.674785	0.516413
8390	0.878505	0.6186	0.545561	0.678531	0.522452
8400	0.864486	0.628004	0.546729	0.677782	0.520451
8410	0.867991	0.645768	0.549065	0.686025	0.533229
8420	0.858645	0.638454	0.531542	0.674785	0.516685
8430	0.86215	0.637409	0.540888	0.678531	0.521699
8440	0.884346	0.647858	0.535047	0.687523	0.536981
8450	0.880841	0.633229	0.544393	0.684151	0.530466
8460	0.859813	0.638454	0.533879	0.675909	0.517525
8470	0.878505	0.633229	0.556075	0.687149	0.534399
8480	0.876168	0.637409	0.542056	0.683402	0.529697
8490	0.870327	0.631139	0.538551	0.678157	0.521723
8500	0.858645	0.650993	0.566589	0.690521	0.538744
8510	0.869159	0.650993	0.524533	0.680405	0.524693
8520	0.869159	0.643678	0.546729	0.684901	0.531445
8530	0.857477	0.61651	0.526869	0.665043	0.501098
8540	0.864486	0.639498	0.545561	0.681529	0.526264
8550	0.876168	0.642633	0.550234	0.687898	0.535295
8560	0.853972	0.634274	0.51285	0.665792	0.502482
8570	0.859813	0.624869	0.543224	0.674035	0.514565
8580	0.889019	0.634274	0.559579	0.692019	0.542489
8590	0.872664	0.624869	0.540888	0.677407	0.52051
8600	0.88785	0.628004	0.557243	0.688647	0.537179
8610	0.880841	0.658307	0.560748	0.698389	0.551592
8620	0.860981	0.626959	0.535047	0.672537	0.512346
8630	0.886682	0.645768	0.547897	0.691645	0.541959
8640	0.882009	0.629049	0.543224	0.682653	0.528856
8650	0.863318	0.62069	0.530374	0.669539	0.508205
8660	0.86215	0.654127	0.53271	0.681903	0.527571
8670	0.867991	0.632184	0.53972	0.678157	0.521244
8680	0.870327	0.646813	0.536215	0.683027	0.528557
8690	0.86215	0.660397	0.549065	0.689397	0.537527
8700	0.859813	0.639498	0.537383	0.677407	0.519988
8710	0.85514	0.649948	0.554907	0.685275	0.531102
8720	0.858645	0.647858	0.531542	0.678157	0.521016
8730	0.877336	0.643678	0.550234	0.688647	0.537412
8740	0.864486	0.625914	0.55257	0.678906	0.521847
8750	0.864486	0.644723	0.561916	0.688647	0.53591
8760	0.873832	0.62278	0.540888	0.677033	0.520262
8770	0.856308	0.634274	0.538551	0.674785	0.515215
8780	0.859813	0.652038	0.535047	0.681154	0.525918
8790	0.871495	0.628004	0.55257	0.681903	0.526983
8800	0.872664	0.656217	0.549065	0.69127	0.540402
8810	0.866822	0.643678	0.537383	0.681154	0.526141
8820	0.865654	0.641588	0.53972	0.680779	0.525015
8830	0.873832	0.646813	0.566589	0.693893	0.545514
8840	0.85514	0.640543	0.538551	0.676658	0.519844
8850	0.857477	0.62278	0.554907	0.676283	0.518325
8860	0.866822	0.626959	0.545561	0.677782	0.520689
8870	0.860981	0.638454	0.51986	0.671787	0.512151
8880	0.864486	0.634274	0.542056	0.678531	0.521973
8890	0.869159	0.638454	0.535047	0.679281	0.522639
8900	0.863318	0.623824	0.551402	0.677407	0.520329
8910	0.858645	0.624869	0.547897	0.675159	0.516981
8920	0.864486	0.633229	0.546729	0.679655	0.522986
8930	0.867991	0.631139	0.551402	0.681529	0.526569
8940	0.865654	0.645768	0.545561	0.684151	0.530643
8950	0.848131	0.632184	0.525701	0.667291	0.503931
8960	0.858645	0.628004	0.536215	0.672537	0.513638
8970	0.85514	0.637409	0.540888	0.676283	0.517786
8980	0.864486	0.61651	0.53271	0.669164	0.507752
8990	0.863318	0.637409	0.538551	0.678157	0.521378
9000	0.863318	0.62069	0.543224	0.673661	0.51438
9010	0.858645	0.643678	0.547897	0.681903	0.527196
9020	0.875	0.635319	0.584112	0.695766	0.54671
9030	0.880841	0.626959	0.563084	0.687898	0.535913
9040	0.859813	0.617555	0.543224	0.671413	0.51096
9050	0.870327	0.631139	0.567757	0.687523	0.535381
9060	0.85514	0.650993	0.559579	0.687149	0.534571
9070	0.865654	0.634274	0.51285	0.669539	0.509852
9080	0.864486	0.632184	0.542056	0.677782	0.520351
9090	0.863318	0.634274	0.55257	0.681529	0.525697
9100	0.865654	0.644723	0.554907	0.686774	0.533669
9110	0.884346	0.633229	0.533879	0.681903	0.527525
9120	0.844626	0.617555	0.551402	0.669164	0.506528
9130	0.870327	0.646813	0.517523	0.677033	0.520123
9140	0.848131	0.623824	0.516355	0.661296	0.496322
9150	0.870327	0.638454	0.536215	0.68003	0.524356
9160	0.871495	0.643678	0.515187	0.675534	0.517644
9170	0.877336	0.632184	0.528037	0.677407	0.520607
9180	0.860981	0.619645	0.560748	0.678157	0.520472
9190	0.864486	0.619645	0.542056	0.673286	0.513883
9200	0.864486	0.630094	0.53972	0.676283	0.517769
9210	0.864486	0.626959	0.51986	0.66879	0.507959
9220	0.880841	0.636364	0.523364	0.678531	0.523036
9230	0.859813	0.635319	0.574766	0.687898	0.535132
9240	0.84229	0.636364	0.540888	0.671787	0.510779
9250	0.859813	0.636364	0.525701	0.672537	0.513388
9260	0.864486	0.636364	0.547897	0.681154	0.525901
9270	0.872664	0.638454	0.51285	0.673286	0.514698
9280	0.877336	0.639498	0.550234	0.687149	0.534747
9290	0.859813	0.645768	0.545561	0.682278	0.526653
9300	0.856308	0.641588	0.556075	0.683027	0.527721
9310	0.869159	0.638454	0.517523	0.673661	0.515025
9320	0.853972	0.6186	0.544393	0.670288	0.508703
9330	0.866822	0.630094	0.53972	0.677033	0.519116
9340	0.863318	0.619645	0.542056	0.672911	0.513596
9350	0.863318	0.628004	0.535047	0.673661	0.514799
9360	0.863318	0.621735	0.551402	0.676658	0.518003
9370	0.859813	0.630094	0.521028	0.66879	0.507421
9380	0.849299	0.646813	0.531542	0.674785	0.515411
9390	0.863318	0.633229	0.557243	0.682653	0.527806
9400	0.869159	0.633229	0.543224	0.68003	0.524403
9410	0.838785	0.6186	0.551402	0.667666	0.505108
9420	0.857477	0.637409	0.546729	0.678906	0.521863
9430	0.859813	0.602926	0.525701	0.660547	0.495299
9440	0.865654	0.657262	0.524533	0.681529	0.527093
9450	0.871495	0.643678	0.547897	0.686025	0.532641
9460	0.877336	0.646813	0.521028	0.680405	0.526094
9470	0.869159	0.639498	0.531542	0.678531	0.521886
9480	0.849299	0.626959	0.504673	0.659048	0.492725
9490	0.85514	0.637409	0.545561	0.677782	0.519806
9500	0.879673	0.638454	0.545561	0.686025	0.5334
9510	0.85514	0.628004	0.531542	0.669914	0.509207
9520	0.858645	0.643678	0.51986	0.672911	0.5134
9530	0.875	0.645768	0.53271	0.683027	0.528275
9540	0.860981	0.647858	0.515187	0.673661	0.515215
9550	0.858645	0.663532	0.538551	0.686025	0.532122
9560	0.86215	0.607106	0.525701	0.662795	0.498857
9570	0.860981	0.630094	0.521028	0.669164	0.508248
9580	0.859813	0.62069	0.535047	0.669914	0.508971
9590	0.865654	0.629049	0.547897	0.678906	0.521876
9600	0.86215	0.641588	0.528037	0.675909	0.517776
9610	0.86215	0.637409	0.536215	0.677033	0.520346
9620	0.864486	0.643678	0.53972	0.681154	0.525696
9630	0.853972	0.639498	0.522196	0.670663	0.510353
9640	0.844626	0.615465	0.535047	0.66317	0.498242
9650	0.851636	0.638454	0.571262	0.685275	0.531209
9660	0.880841	0.6186	0.51986	0.671038	0.511603
9670	0.869159	0.631139	0.528037	0.67441	0.516181
9680	0.863318	0.641588	0.535047	0.678531	0.522131
9690	0.865654	0.630094	0.516355	0.669164	0.508412
9700	0.864486	0.621735	0.530374	0.670288	0.509496
9710	0.865654	0.639498	0.551402	0.683777	0.529059
9720	0.884346	0.637409	0.538551	0.684901	0.532791
9730	0.848131	0.630094	0.556075	0.676283	0.517603
9740	0.839953	0.61442	0.538551	0.66242	0.496749
9750	0.850467	0.666667	0.53972	0.684901	0.530568
9760	0.849299	0.630094	0.53972	0.671413	0.511008
9770	0.859813	0.640543	0.542056	0.679281	0.52269
9780	0.856308	0.615465	0.536215	0.667291	0.504944
9790	0.852804	0.640543	0.530374	0.673286	0.513974
9800	0.865654	0.631139	0.55257	0.681154	0.525631
9810	0.856308	0.661442	0.524533	0.68003	0.524049
9820	0.865654	0.624869	0.580607	0.687898	0.535839
9830	0.845794	0.611285	0.55257	0.667666	0.504734
9840	0.860981	0.636364	0.524533	0.672537	0.513563
9850	0.857477	0.641588	0.55257	0.682278	0.527329
9860	0.865654	0.639498	0.55257	0.684151	0.529994
9870	0.863318	0.632184	0.524533	0.671787	0.512287
9880	0.869159	0.643678	0.533879	0.680779	0.525103
9890	0.857477	0.657262	0.560748	0.690521	0.539463
9900	0.852804	0.636364	0.516355	0.667291	0.504712
9910	0.86215	0.623824	0.523364	0.66804	0.506494
9920	0.852804	0.62069	0.518692	0.66242	0.497902
9930	0.85514	0.632184	0.529206	0.670663	0.510473
9940	0.857477	0.636364	0.536215	0.675159	0.516569
9950	0.830607	0.624869	0.533879	0.661671	0.496062
9960	0.850467	0.632184	0.523364	0.667291	0.505585
9970	0.872664	0.649948	0.547897	0.688647	0.537424
9980	0.858645	0.625914	0.521028	0.666916	0.504119
9990	0.857477	0.632184	0.517523	0.667666	0.505527
10000	0.856308	0.621735	0.504673	0.659423	0.493271
10010	0.865654	0.637409	0.509346	0.669539	0.510098
10020	0.850467	0.632184	0.563084	0.68003	0.523678
10030	0.869159	0.615465	0.558411	0.678531	0.522109
10040	0.844626	0.631139	0.533879	0.668415	0.506698
10050	0.850467	0.631139	0.528037	0.668415	0.506952
10060	0.850467	0.640543	0.528037	0.671787	0.511546
10070	0.831776	0.636364	0.543224	0.669164	0.506705
10080	0.864486	0.6186	0.516355	0.664668	0.501308
10090	0.867991	0.615465	0.538551	0.671787	0.511121
10100	0.864486	0.617555	0.540888	0.672162	0.513115
10110	0.86215	0.649948	0.53972	0.682653	0.527678
10120	0.857477	0.630094	0.53972	0.674035	0.5151
10130	0.844626	0.642633	0.542056	0.675159	0.516048
10140	0.852804	0.644723	0.525701	0.673286	0.514006
10150	0.853972	0.61651	0.547897	0.670663	0.509661
10160	0.853972	0.659352	0.529206	0.68003	0.523765
10170	0.863318	0.61651	0.528037	0.667291	0.505438
10180	0.867991	0.633229	0.524533	0.673661	0.515293
10190	0.83528	0.628004	0.529206	0.662795	0.497739
10200	0.85514	0.621735	0.557243	0.675909	0.517254
10210	0.853972	0.629049	0.511682	0.663544	0.499093
10220	0.850467	0.633229	0.510514	0.663544	0.500043
10230	0.848131	0.650993	0.514019	0.670288	0.508682
10240	0.863318	0.643678	0.524533	0.675909	0.51801
10250	0.843458	0.636364	0.524533	0.666916	0.504445
10260	0.879673	0.635319	0.51285	0.67441	0.517221
10270	0.863318	0.637409	0.535047	0.677033	0.519501
10280	0.860981	0.625914	0.526869	0.669539	0.508742
10290	0.867991	0.644723	0.521028	0.676658	0.520094
10300	0.857477	0.638454	0.529206	0.673661	0.514635
10310	0.866822	0.62069	0.543224	0.674785	0.51625
10320	0.838785	0.629049	0.526869	0.663544	0.498489
10330	0.846963	0.626959	0.516355	0.662046	0.496912
10340	0.846963	0.638454	0.521028	0.667666	0.505663
10350	0.850467	0.62278	0.536215	0.66804	0.505525
10360	0.853972	0.633229	0.547897	0.676658	0.51803
10370	0.865654	0.637409	0.547897	0.681903	0.52671
10380	0.86215	0.649948	0.521028	0.676658	0.520121
10390	0.83528	0.615465	0.542056	0.66242	0.49668
10400	0.859813	0.633229	0.526869	0.671787	0.511972
10410	0.857477	0.625914	0.517523	0.665418	0.501814
10420	0.843458	0.641588	0.543224	0.674785	0.515791
10430	0.850467	0.655172	0.526869	0.676658	0.518626
10440	0.866822	0.638454	0.528037	0.676283	0.518156
10450	0.856308	0.630094	0.530374	0.670663	0.510054
10460	0.857477	0.62069	0.538551	0.670288	0.509237
10470	0.846963	0.629049	0.53271	0.66804	0.505387
10480	0.849299	0.626959	0.546729	0.672537	0.512084
10490	0.851636	0.628004	0.524533	0.666542	0.503371
10500	0.848131	0.645768	0.518692	0.669914	0.508267
10510	0.843458	0.643678	0.540888	0.674785	0.515881
10520	0.852804	0.635319	0.530374	0.671413	0.511152
10530	0.856308	0.637409	0.523364	0.671038	0.511378
10540	0.852804	0.633229	0.522196	0.66804	0.505904
10550	0.841121	0.630094	0.495327	0.654552	0.486387
10560	0.852804	0.619645	0.53271	0.666542	0.503519
10570	0.857477	0.635319	0.517523	0.66879	0.507477
10580	0.849299	0.61651	0.528037	0.662795	0.498385
10590	0.852804	0.630094	0.542056	0.673286	0.514334
10600	0.838785	0.639498	0.508178	0.661296	0.496567
10610	0.85514	0.623824	0.526869	0.666916	0.504454
10620	0.838785	0.625914	0.511682	0.65755	0.489132
10630	0.858645	0.594566	0.515187	0.653803	0.48512
10640	0.852804	0.632184	0.526869	0.669164	0.507344
10650	0.844626	0.61024	0.507009	0.652304	0.482594
10660	0.844626	0.631139	0.521028	0.664294	0.499831
10670	0.845794	0.629049	0.55257	0.674035	0.514246
10680	0.839953	0.631139	0.523364	0.663544	0.498596
10690	0.838785	0.625914	0.537383	0.665792	0.502355
10700	0.821262	0.640543	0.533879	0.664294	0.499073
10710	0.873832	0.641588	0.525701	0.678906	0.524027
10720	0.837617	0.619645	0.530374	0.660922	0.494401
10730	0.851636	0.60815	0.53271	0.662046	0.496615
10740	0.876168	0.62069	0.53271	0.67441	0.516134
10750	0.841121	0.633229	0.51285	0.661296	0.495621
10760	0.841121	0.640543	0.529206	0.669164	0.507317
10770	0.841121	0.638454	0.516355	0.664294	0.500391
10780	0.845794	0.628004	0.505841	0.658674	0.491718
10790	0.85514	0.6186	0.517523	0.662046	0.497695
10800	0.844626	0.631139	0.530374	0.667291	0.504344
10810	0.841121	0.644723	0.515187	0.666167	0.502985
10820	0.867991	0.607106	0.530374	0.666167	0.503839
10830	0.856308	0.61442	0.521028	0.662046	0.497284
10840	0.856308	0.61233	0.51285	0.658674	0.491688
10850	0.844626	0.631139	0.511682	0.661296	0.495779
10860	0.857477	0.633229	0.523364	0.669914	0.508573
10870	0.850467	0.653083	0.533879	0.678157	0.521145
10880	0.86215	0.664577	0.501168	0.675534	0.517627
10890	0.846963	0.623824	0.508178	0.658299	0.491383
10900	0.844626	0.645768	0.518692	0.66879	0.507223
10910	0.866822	0.605016	0.518692	0.661296	0.496574
10920	0.845794	0.638454	0.517523	0.666167	0.502543
10930	0.858645	0.61442	0.517523	0.661671	0.497044
10940	0.84229	0.62069	0.528037	0.662046	0.497122
10950	0.848131	0.6186	0.549065	0.669914	0.508489
10960	0.832944	0.640543	0.515187	0.662046	0.497131
10970	0.834112	0.641588	0.498832	0.65755	0.490834
10980	0.85514	0.636364	0.526869	0.671413	0.510355
10990	0.85514	0.62278	0.481308	0.65193	0.482517
11000	0.863318	0.629049	0.51285	0.666916	0.505567
11010	0.838785	0.628004	0.503505	0.655676	0.488157
11020	0.844626	0.625914	0.503505	0.6568	0.489969
11030	0.851636	0.635319	0.514019	0.665792	0.502869
11040	0.859813	0.649948	0.511682	0.672911	0.513959
11050	0.849299	0.621735	0.497664	0.654927	0.486557
11060	0.85514	0.643678	0.508178	0.66804	0.506373
11070	0.853972	0.619645	0.510514	0.659798	0.494109
11080	0.838785	0.635319	0.526869	0.665792	0.502803
11090	0.844626	0.634274	0.490654	0.655676	0.487644
11100	0.832944	0.609195	0.524533	0.653803	0.484358
11110	0.841121	0.61233	0.523364	0.657175	0.488981
11120	0.843458	0.624869	0.526869	0.663544	0.498317
11130	0.846963	0.645768	0.5	0.663544	0.500058
11140	0.863318	0.62069	0.508178	0.66242	0.498859
11150	0.841121	0.624869	0.536215	0.665792	0.502504
11160	0.837617	0.621735	0.491822	0.649307	0.478275
11170	0.838785	0.632184	0.511682	0.659798	0.49358
11180	0.829439	0.619645	0.514019	0.653054	0.482716
11190	0.85514	0.635319	0.531542	0.672537	0.513388
11200	0.850467	0.624869	0.51986	0.663544	0.498624
11210	0.858645	0.632184	0.496495	0.661296	0.497085
11220	0.848131	0.621735	0.53972	0.66804	0.505569
11230	0.836449	0.629049	0.530374	0.663919	0.499015
11240	0.864486	0.636364	0.51285	0.669914	0.509591
11250	0.843458	0.628004	0.476636	0.648558	0.47829
11260	0.843458	0.626959	0.517523	0.661296	0.497295
11270	0.845794	0.626959	0.544393	0.670663	0.509416
11280	0.867991	0.639498	0.540888	0.681154	0.526864
11290	0.844626	0.629049	0.521028	0.663544	0.498747
11300	0.851636	0.632184	0.536215	0.671787	0.511818
11310	0.832944	0.630094	0.509346	0.656426	0.488399
11320	0.858645	0.628004	0.529206	0.670288	0.509536
11330	0.859813	0.623824	0.551402	0.676283	0.518468
11340	0.831776	0.636364	0.538551	0.667666	0.504731
11350	0.829439	0.645768	0.545561	0.672537	0.511823
11360	0.85514	0.631139	0.510514	0.664294	0.500418
11370	0.849299	0.62069	0.531542	0.665418	0.50199
11380	0.858645	0.613375	0.510514	0.659048	0.493308
11390	0.852804	0.621735	0.51986	0.66317	0.499241
11400	0.845794	0.603971	0.507009	0.650431	0.479096
11410	0.837617	0.635319	0.504673	0.658299	0.49182
11420	0.858645	0.62069	0.526869	0.666916	0.504738
11430	0.844626	0.637409	0.522196	0.666916	0.504826
11440	0.831776	0.639498	0.529206	0.665792	0.501791
11450	0.83528	0.642633	0.533879	0.669539	0.508152
11460	0.865654	0.642633	0.528037	0.677407	0.519981
11470	0.846963	0.649948	0.511682	0.66879	0.507973
11480	0.852804	0.62069	0.511682	0.660172	0.494803
11490	0.839953	0.629049	0.544393	0.669539	0.50751
11500	0.845794	0.602926	0.522196	0.654927	0.48699
11510	0.820093	0.638454	0.535047	0.663544	0.498599
11520	0.853972	0.634274	0.525701	0.669914	0.50851
11530	0.836449	0.626959	0.547897	0.66879	0.506109
11540	0.843458	0.61442	0.545561	0.665792	0.501803
11550	0.83528	0.6186	0.524533	0.657924	0.489653
11560	0.817757	0.638454	0.497664	0.650806	0.479837
11570	0.859813	0.61233	0.526869	0.664294	0.500288
11580	0.845794	0.625914	0.547897	0.671413	0.510831
11590	0.850467	0.624869	0.510514	0.660547	0.495079
11600	0.839953	0.615465	0.491822	0.647808	0.475418
11610	0.825935	0.619645	0.504673	0.648932	0.477041
11620	0.852804	0.61651	0.542056	0.668415	0.506332
11630	0.84229	0.624869	0.501168	0.654927	0.486646
11640	0.827103	0.632184	0.514019	0.6568	0.488568
11650	0.85514	0.615465	0.535047	0.666542	0.503796
11660	0.831776	0.624869	0.530374	0.660922	0.494241
11670	0.84229	0.60815	0.53271	0.659048	0.492022
11680	0.834112	0.630094	0.51986	0.660172	0.494383
11690	0.841121	0.621735	0.546729	0.66804	0.505809
11700	0.845794	0.62278	0.535047	0.666167	0.503086
11710	0.860981	0.62069	0.51285	0.66317	0.498877
11720	0.852804	0.61442	0.497664	0.653428	0.48511
11730	0.863318	0.625914	0.516355	0.666916	0.504785
11740	0.848131	0.629049	0.511682	0.661671	0.496853
11750	0.848131	0.611285	0.51285	0.655676	0.487788
11760	0.848131	0.645768	0.523364	0.671413	0.510687
11770	0.848131	0.647858	0.531542	0.674785	0.515653
11780	0.853972	0.635319	0.53271	0.672537	0.512664
11790	0.818925	0.626959	0.522196	0.654927	0.484861
11800	0.852804	0.630094	0.515187	0.664668	0.50135
11810	0.857477	0.638454	0.51986	0.670663	0.510405
11820	0.84229	0.6186	0.514019	0.6568	0.489456
11830	0.856308	0.645768	0.521028	0.673286	0.51424
11840	0.859813	0.641588	0.524533	0.674035	0.51474
11850	0.839953	0.6186	0.51285	0.655676	0.487868
11860	0.831776	0.62278	0.514019	0.654927	0.486083
11870	0.837617	0.62278	0.521028	0.659048	0.492579
11880	0.843458	0.625914	0.524533	0.66317	0.498693
11890	0.839953	0.631139	0.492991	0.653803	0.485347
11900	0.838785	0.623824	0.492991	0.650806	0.479968
11910	0.831776	0.631139	0.521028	0.660172	0.494588
11920	0.843458	0.634274	0.518692	0.664294	0.499596
11930	0.848131	0.662487	0.523364	0.677407	0.520611
11940	0.856308	0.630094	0.535047	0.672162	0.512594
11950	0.84229	0.624869	0.530374	0.664294	0.501029
11960	0.83528	0.621735	0.530374	0.660922	0.494734
11970	0.824766	0.638454	0.502336	0.654552	0.485606
11980	0.853972	0.619645	0.526869	0.665043	0.501989
11990	0.841121	0.626959	0.540888	0.66804	0.505973
12000	0.850467	0.61024	0.51986	0.658299	0.491337
12010	0.834112	0.639498	0.502336	0.657924	0.491221
12020	0.844626	0.607106	0.503505	0.650056	0.479732
12030	0.843458	0.615465	0.522196	0.658674	0.492299
12040	0.83528	0.644723	0.510514	0.662795	0.497544
12050	0.839953	0.641588	0.515187	0.664668	0.500821
12060	0.84229	0.613375	0.511682	0.654178	0.485643
12070	0.852804	0.626959	0.505841	0.660547	0.494812
12080	0.856308	0.615465	0.505841	0.65755	0.49096
12090	0.839953	0.62278	0.503505	0.654178	0.486518
12100	0.824766	0.636364	0.523364	0.660547	0.49369
12110	0.838785	0.62069	0.529206	0.661296	0.494936
12120	0.829439	0.629049	0.484813	0.647059	0.475407
12130	0.848131	0.623824	0.51986	0.66242	0.497722
12140	0.841121	0.635319	0.531542	0.66804	0.506098
12150	0.830607	0.634274	0.51986	0.660547	0.494339
12160	0.85514	0.628004	0.51285	0.663919	0.500697
12170	0.851636	0.628004	0.501168	0.659048	0.492549
12180	0.853972	0.623824	0.517523	0.663544	0.499664
12190	0.838785	0.603971	0.51285	0.650056	0.479259
12200	0.85514	0.641588	0.525701	0.672911	0.513312
12210	0.846963	0.631139	0.525701	0.666542	0.503378
12220	0.851636	0.636364	0.530374	0.671413	0.511631
12230	0.832944	0.641588	0.496495	0.656426	0.489165
12240	0.844626	0.609195	0.478972	0.642937	0.469779
12250	0.844626	0.633229	0.529206	0.667666	0.505597
12260	0.836449	0.62278	0.509346	0.654927	0.486608
12270	0.857477	0.635319	0.510514	0.666542	0.504616
12280	0.850467	0.629049	0.504673	0.660172	0.494693
12290	0.845794	0.61651	0.510514	0.656051	0.487562
12300	0.818925	0.6186	0.521028	0.651555	0.480674
12310	0.827103	0.613375	0.503505	0.646684	0.474294
12320	0.83528	0.628004	0.533879	0.664294	0.500089
12330	0.839953	0.648903	0.504673	0.663919	0.499592
12340	0.817757	0.631139	0.503505	0.650056	0.478931
12350	0.850467	0.640543	0.53972	0.675534	0.516171
12360	0.836449	0.630094	0.498832	0.654178	0.485204
12370	0.839953	0.619645	0.507009	0.654178	0.48455
12380	0.832944	0.638454	0.511682	0.660172	0.494456
12390	0.844626	0.641588	0.504673	0.662795	0.498044
12400	0.831776	0.629049	0.537383	0.664668	0.500327
12410	0.834112	0.629049	0.523364	0.660922	0.495162
12420	0.84229	0.625914	0.531542	0.665043	0.501737
12430	0.837617	0.619645	0.514019	0.655676	0.486249
12440	0.828271	0.62278	0.515187	0.654178	0.484644
12450	0.831776	0.639498	0.498832	0.656051	0.487454
12460	0.84229	0.630094	0.51986	0.662795	0.497904
12470	0.836449	0.638454	0.501168	0.657924	0.490766
12480	0.85514	0.61442	0.5	0.654927	0.48667
12490	0.834112	0.61024	0.525701	0.654927	0.485366
12500	0.843458	0.628004	0.533879	0.666916	0.503794
12510	0.846963	0.625914	0.535047	0.667666	0.506089
12520	0.84229	0.609195	0.517523	0.654552	0.485671
12530	0.843458	0.619645	0.498832	0.652679	0.483557
12540	0.834112	0.625914	0.526869	0.660922	0.495355
12550	0.823598	0.636364	0.53972	0.665418	0.500574
12560	0.839953	0.631139	0.497664	0.655302	0.487858
12570	0.828271	0.624869	0.505841	0.65193	0.481789
12580	0.829439	0.640543	0.529206	0.665418	0.501261
12590	0.844626	0.621735	0.529206	0.663544	0.498945
12600	0.851636	0.623824	0.502336	0.657924	0.49136
12610	0.839953	0.648903	0.498832	0.662046	0.496906
12620	0.829439	0.643678	0.507009	0.659423	0.493172
12630	0.844626	0.61651	0.505841	0.654178	0.485126
12640	0.828271	0.626959	0.498832	0.650431	0.479379
12650	0.831776	0.62278	0.491822	0.647808	0.475213
12660	0.82243	0.647858	0.514019	0.660922	0.494585
12670	0.83528	0.639498	0.529206	0.666916	0.503947
12680	0.829439	0.617555	0.530374	0.65755	0.489099
12690	0.848131	0.623824	0.483645	0.650806	0.480076
12700	0.829439	0.607106	0.5	0.644061	0.470072
12710	0.865654	0.644723	0.494159	0.667291	0.506431
12720	0.838785	0.644723	0.505841	0.66242	0.498044
12730	0.848131	0.61651	0.502336	0.654178	0.485998
12740	0.844626	0.644723	0.495327	0.660922	0.496188
12750	0.845794	0.631139	0.523364	0.665418	0.501931
12760	0.82243	0.62069	0.521028	0.653428	0.483345
12770	0.858645	0.633229	0.502336	0.663544	0.50029
12780	0.841121	0.62069	0.481308	0.646684	0.474571
12790	0.818925	0.624869	0.497664	0.646309	0.473128
12800	0.850467	0.645768	0.508178	0.667291	0.505024
12810	0.849299	0.62069	0.5	0.655302	0.488185
12820	0.825935	0.628004	0.5	0.650431	0.47886
12830	0.828271	0.631139	0.489486	0.648932	0.477013
12840	0.834112	0.628004	0.518692	0.659048	0.491769
12850	0.851636	0.61233	0.501168	0.653428	0.484507
12860	0.836449	0.603971	0.524533	0.653054	0.483279
12870	0.846963	0.626959	0.5	0.6568	0.489839
12880	0.841121	0.625914	0.536215	0.666167	0.503325
12890	0.838785	0.628004	0.502336	0.655302	0.486695
12900	0.838785	0.62278	0.507009	0.654927	0.486696
12910	0.838785	0.619645	0.516355	0.6568	0.489259
12920	0.845794	0.636364	0.507009	0.662046	0.49746
12930	0.828271	0.628004	0.490654	0.648183	0.475935
12940	0.818925	0.62069	0.507009	0.647808	0.474798
12950	0.838785	0.637409	0.518692	0.663919	0.499209
12960	0.829439	0.631139	0.502336	0.653428	0.483682
12970	0.837617	0.599791	0.51285	0.648183	0.475958
12980	0.841121	0.619645	0.522196	0.659423	0.492138
12990	0.849299	0.633229	0.510514	0.66317	0.499547
13000	0.830607	0.633229	0.5	0.653803	0.484777
13010	0.831776	0.629049	0.523364	0.660172	0.493898
13020	0.827103	0.6186	0.522196	0.654552	0.485612
13030	0.817757	0.636364	0.510514	0.654178	0.484937
13040	0.823598	0.6186	0.530374	0.656051	0.48688
13050	0.848131	0.624869	0.517523	0.662046	0.496404
13060	0.857477	0.631139	0.522196	0.66879	0.507617
13070	0.846963	0.61651	0.514019	0.65755	0.490421
13080	0.84229	0.61024	0.525701	0.65755	0.489952
13090	0.84229	0.645768	0.503505	0.66317	0.499115
13100	0.843458	0.623824	0.496495	0.653428	0.484485
13110	0.83528	0.645768	0.501168	0.660172	0.4941
13120	0.844626	0.631139	0.518692	0.663544	0.498481
13130	0.83528	0.624869	0.511682	0.656051	0.487667
13140	0.839953	0.640543	0.496495	0.658299	0.492326
13150	0.845794	0.615465	0.490654	0.649307	0.478822
13160	0.845794	0.637409	0.489486	0.6568	0.489922
13170	0.848131	0.634274	0.478972	0.653054	0.483727
13180	0.82243	0.61651	0.510514	0.648558	0.474908
13190	0.845794	0.621735	0.502336	0.655302	0.487451
13200	0.816589	0.617555	0.533879	0.654552	0.48457
13210	0.839953	0.613375	0.529206	0.659048	0.493195
13220	0.846963	0.621735	0.514019	0.659423	0.492576
13230	0.828271	0.639498	0.504673	0.6568	0.488679
13240	0.836449	0.624869	0.476636	0.645185	0.472215
13250	0.836449	0.640543	0.489486	0.654927	0.486859
13260	0.823598	0.630094	0.488318	0.646684	0.474404
13270	0.845794	0.6186	0.510514	0.6568	0.489395
13280	0.836449	0.633229	0.507009	0.657924	0.490067
13290	0.830607	0.611285	0.490654	0.642937	0.468085
13300	0.832944	0.6186	0.521028	0.656051	0.487636
13310	0.843458	0.61233	0.507009	0.652679	0.483025
13320	0.828271	0.642633	0.518692	0.66242	0.497406
13330	0.827103	0.61024	0.471963	0.635444	0.457654
13340	0.84229	0.626959	0.495327	0.653803	0.486033
13350	0.836449	0.648903	0.502336	0.662046	0.497117
13360	0.820093	0.61651	0.510514	0.647808	0.475182
13370	0.839953	0.61651	0.5	0.650806	0.480766
13380	0.832944	0.6186	0.501168	0.649682	0.478627
13390	0.836449	0.623824	0.517523	0.657924	0.490643
13400	0.846963	0.656217	0.494159	0.665418	0.503116
13410	0.853972	0.629049	0.509346	0.662795	0.499294
13420	0.856308	0.615465	0.496495	0.654552	0.486203
13430	0.856308	0.644723	0.461449	0.653803	0.486478
13440	0.814252	0.619645	0.491822	0.641064	0.46575
13450	0.829439	0.635319	0.502336	0.654927	0.486872
13460	0.83528	0.6186	0.482477	0.644436	0.471401
13470	0.830607	0.635319	0.518692	0.660547	0.494367
13480	0.856308	0.613375	0.502336	0.655676	0.487916
13490	0.852804	0.634274	0.494159	0.659423	0.494019
13500	0.823598	0.611285	0.491822	0.641064	0.465292
13510	0.817757	0.625914	0.5	0.647059	0.474074
13520	0.825935	0.611285	0.495327	0.642937	0.468364
13530	0.848131	0.628004	0.502336	0.658299	0.49165
13540	0.843458	0.638454	0.489486	0.656426	0.489097
13550	0.821262	0.61024	0.502336	0.643312	0.468681
13560	0.831776	0.625914	0.501168	0.65193	0.481713
13570	0.838785	0.623824	0.496495	0.65193	0.482182
13580	0.830607	0.630094	0.526869	0.661296	0.494575
13590	0.827103	0.626959	0.488318	0.646684	0.473879
13600	0.828271	0.623824	0.483645	0.644436	0.470771
13610	0.823598	0.613375	0.501168	0.644811	0.471482
13620	0.837617	0.61651	0.484813	0.645185	0.472369
13630	0.821262	0.61442	0.501168	0.644436	0.47065
13640	0.830607	0.628004	0.470794	0.642563	0.468263
13650	0.839953	0.626959	0.494159	0.652679	0.483421
13660	0.801402	0.613375	0.51285	0.641439	0.466188
13670	0.827103	0.635319	0.514019	0.657924	0.491212
13680	0.831776	0.631139	0.523364	0.660922	0.494874
13690	0.852804	0.615465	0.482477	0.648932	0.478466
13700	0.813084	0.637409	0.471963	0.640689	0.46481
13710	0.818925	0.635319	0.518692	0.6568	0.489045
13720	0.831776	0.6186	0.51285	0.653054	0.484002
13730	0.848131	0.62069	0.504673	0.656426	0.489327
13740	0.827103	0.636364	0.504673	0.655302	0.486774
13750	0.841121	0.621735	0.491822	0.650431	0.480011
13760	0.843458	0.647858	0.504673	0.664668	0.500889
13770	0.84229	0.628004	0.508178	0.658299	0.490955
13780	0.851636	0.601881	0.507009	0.651555	0.481737
13790	0.817757	0.633229	0.483645	0.644436	0.470573
13800	0.811916	0.61024	0.492991	0.637317	0.460009
13810	0.849299	0.639498	0.508178	0.664668	0.501277
13820	0.834112	0.61233	0.510514	0.650806	0.480395
13830	0.83528	0.630094	0.515187	0.659048	0.492714
13840	0.823598	0.650993	0.516355	0.66317	0.498669
13850	0.838785	0.61024	0.489486	0.644811	0.471544
13860	0.83528	0.599791	0.5	0.643312	0.468614
13870	0.832944	0.61442	0.492991	0.64556	0.472584
13880	0.831776	0.62278	0.484813	0.64556	0.472709
13890	0.825935	0.635319	0.484813	0.648183	0.476324
13900	0.815421	0.621735	0.510514	0.648183	0.475834
13910	0.83528	0.61442	0.526869	0.657175	0.489108
13920	0.820093	0.637409	0.502336	0.652679	0.482844
13930	0.829439	0.609195	0.494159	0.642937	0.468504
13940	0.843458	0.626959	0.510514	0.659048	0.492481
13950	0.836449	0.62278	0.510514	0.655302	0.487152
13960	0.829439	0.624869	0.503505	0.651555	0.48159
13970	0.832944	0.640543	0.508178	0.659798	0.494479
13980	0.823598	0.624869	0.511682	0.652304	0.481907
13990	0.824766	0.625914	0.517523	0.654927	0.485809
14000	0.814252	0.6186	0.51986	0.649682	0.477022
14010	0.804907	0.621735	0.5	0.641439	0.465162
14020	0.827103	0.615465	0.507009	0.648558	0.476724
14030	0.845794	0.62278	0.505841	0.6568	0.490051
14040	0.844626	0.61233	0.497664	0.650056	0.479895
14050	0.824766	0.61233	0.476636	0.636943	0.459263
14060	0.827103	0.630094	0.497664	0.650806	0.480452
14070	0.83528	0.624869	0.462617	0.640315	0.464848
14080	0.82243	0.619645	0.524533	0.654178	0.484706
14090	0.853972	0.613375	0.498832	0.653803	0.485445
14100	0.838785	0.633229	0.478972	0.649682	0.47933
14110	0.821262	0.641588	0.5	0.653803	0.484123
14120	0.838785	0.631139	0.511682	0.659423	0.493225
14130	0.827103	0.636364	0.496495	0.652679	0.4828
14140	0.830607	0.626959	0.540888	0.664668	0.500371
14150	0.828271	0.62069	0.490654	0.64556	0.472333
14160	0.837617	0.603971	0.51285	0.649682	0.479065
14170	0.836449	0.611285	0.491822	0.645185	0.471708
14180	0.823598	0.62069	0.5	0.647059	0.474145
14190	0.838785	0.633229	0.525701	0.664668	0.500442
14200	0.831776	0.636364	0.492991	0.653054	0.483963
14210	0.808411	0.61442	0.505841	0.641813	0.465684
14220	0.82243	0.626959	0.490654	0.645935	0.472951
14230	0.815421	0.606061	0.523364	0.646684	0.473282
14240	0.823598	0.615465	0.48014	0.638816	0.461857
14250	0.83528	0.654127	0.489486	0.659423	0.493556
14260	0.820093	0.636364	0.475467	0.643687	0.470089
14270	0.82243	0.637409	0.51986	0.659048	0.492078
14280	0.828271	0.641588	0.508178	0.658674	0.49164
14290	0.811916	0.623824	0.517523	0.650056	0.478713
14300	0.829439	0.635319	0.485981	0.649682	0.479462
14310	0.838785	0.635319	0.504673	0.658674	0.492374
14320	0.837617	0.632184	0.494159	0.653803	0.485404
14330	0.811916	0.607106	0.48014	0.632072	0.451745
14340	0.832944	0.641588	0.474299	0.649307	0.478872
14350	0.815421	0.625914	0.496495	0.645185	0.471632
14360	0.838785	0.633229	0.471963	0.647433	0.475744
14370	0.817757	0.597701	0.510514	0.640315	0.462419
14380	0.824766	0.623824	0.484813	0.643687	0.469422
14390	0.830607	0.62278	0.490654	0.647059	0.474901
14400	0.839953	0.619645	0.511682	0.655676	0.487576
14410	0.83528	0.592476	0.504673	0.642188	0.466802
14420	0.820093	0.623824	0.525701	0.655302	0.486353
14430	0.837617	0.611285	0.510514	0.651555	0.481504
14440	0.83528	0.607106	0.521028	0.652679	0.482947
14450	0.811916	0.639498	0.505841	0.65193	0.480906
14460	0.838785	0.611285	0.494159	0.646684	0.474639
14470	0.846963	0.632184	0.522196	0.665792	0.502428
14480	0.827103	0.61442	0.478972	0.639191	0.46253
14490	0.828271	0.632184	0.516355	0.657924	0.490421
14500	0.809579	0.597701	0.498832	0.633945	0.45311
14510	0.843458	0.635319	0.482477	0.653054	0.483853
14520	0.856308	0.634274	0.505841	0.664294	0.50101
14530	0.827103	0.61651	0.471963	0.637692	0.460885
14540	0.824766	0.636364	0.498832	0.652679	0.482683
14550	0.843458	0.62278	0.469626	0.644436	0.472054
14560	0.815421	0.626959	0.503505	0.647808	0.475387
14570	0.843458	0.628004	0.48014	0.649682	0.478701
14580	0.824766	0.643678	0.511682	0.659423	0.492487
14590	0.830607	0.635319	0.489486	0.65118	0.480841
14600	0.830607	0.625914	0.502336	0.65193	0.481861
14610	0.816589	0.635319	0.491822	0.647433	0.474692
14620	0.832944	0.643678	0.494159	0.656426	0.488946
14630	0.809579	0.624869	0.521028	0.650806	0.478834
14640	0.820093	0.619645	0.51986	0.65193	0.481294
14650	0.829439	0.62069	0.508178	0.651555	0.481686
14660	0.810748	0.629049	0.502336	0.646684	0.473685
14670	0.832944	0.61651	0.498832	0.648183	0.47621
14680	0.827103	0.598746	0.514019	0.644811	0.471088
14690	0.818925	0.594566	0.477804	0.629075	0.447209
14700	0.830607	0.638454	0.484813	0.650806	0.479611
14710	0.838785	0.6186	0.477804	0.644061	0.470933
14720	0.853972	0.605016	0.518692	0.657175	0.489933
14730	0.816589	0.624869	0.484813	0.641439	0.465435
14740	0.84229	0.637409	0.518692	0.665043	0.501422
14750	0.83528	0.6186	0.481308	0.644061	0.472602
14760	0.837617	0.613375	0.507009	0.65118	0.480651
14770	0.821262	0.60815	0.490654	0.638816	0.461942
14780	0.828271	0.633229	0.48715	0.648932	0.477638
14790	0.83528	0.629049	0.476636	0.646309	0.474256
14800	0.816589	0.638454	0.494159	0.649307	0.478037
14810	0.815421	0.624869	0.488318	0.642188	0.467869
14820	0.834112	0.615465	0.462617	0.636568	0.459762
14830	0.84229	0.626959	0.504673	0.6568	0.489124
14840	0.818925	0.613375	0.509346	0.645935	0.47149
14850	0.831776	0.628004	0.489486	0.648932	0.476635
14860	0.829439	0.615465	0.503505	0.648183	0.476013
14870	0.832944	0.621735	0.5	0.650431	0.480164
14880	0.83528	0.596656	0.517523	0.647808	0.475092
14890	0.815421	0.629049	0.5	0.647433	0.474104
14900	0.823598	0.649948	0.502336	0.658299	0.491485
14910	0.831776	0.621735	0.488318	0.646309	0.47336
14920	0.818925	0.60815	0.521028	0.647808	0.474877
14930	0.844626	0.632184	0.491822	0.655302	0.487687
14940	0.808411	0.624869	0.489486	0.640315	0.464572
14950	0.830607	0.636364	0.48014	0.648558	0.47678
14960	0.860981	0.602926	0.489486	0.649307	0.479636
14970	0.83528	0.633229	0.504673	0.6568	0.48966
14980	0.817757	0.621735	0.495327	0.644061	0.470199
14990	0.834112	0.6186	0.524533	0.65755	0.4903
15000	0.825935	0.629049	0.484813	0.645935	0.47299
15010	0.811916	0.60815	0.491822	0.636193	0.457021
15020	0.830607	0.621735	0.497664	0.648932	0.476835
15030	0.821262	0.634274	0.469626	0.641439	0.466818
15040	0.820093	0.62278	0.477804	0.639565	0.463889
15050	0.836449	0.61651	0.489486	0.646309	0.473584
15060	0.824766	0.628004	0.507009	0.652304	0.481996
15070	0.830607	0.615465	0.490654	0.644436	0.470624
15080	0.829439	0.62069	0.497664	0.648183	0.475359
15090	0.821262	0.615465	0.502336	0.645185	0.471679
15100	0.814252	0.631139	0.517523	0.653428	0.48346
15110	0.807243	0.609195	0.496495	0.636568	0.458569
15120	0.823598	0.626959	0.518692	0.655302	0.486319
15130	0.837617	0.617555	0.494159	0.648558	0.476779
15140	0.828271	0.641588	0.471963	0.647059	0.476086
15150	0.825935	0.62069	0.503505	0.648932	0.477175
15160	0.818925	0.62278	0.502336	0.647059	0.474812
15170	0.843458	0.645768	0.494159	0.660547	0.49604
15180	0.823598	0.62278	0.490654	0.644811	0.471019
15190	0.811916	0.626959	0.475467	0.637692	0.460909
15200	0.836449	0.62278	0.471963	0.642937	0.469519
15210	0.827103	0.629049	0.485981	0.646684	0.474124
15220	0.817757	0.624869	0.481308	0.640689	0.46539
15230	0.814252	0.621735	0.511682	0.648183	0.475741
15240	0.830607	0.640543	0.495327	0.654927	0.487596
15250	0.837617	0.626959	0.51986	0.660172	0.494021
15260	0.814252	0.628004	0.478972	0.63994	0.464051
15270	0.827103	0.62278	0.478972	0.642188	0.467529
15280	0.832944	0.591432	0.511682	0.643312	0.469433
15290	0.834112	0.598746	0.488318	0.638816	0.461854
15300	0.817757	0.641588	0.524533	0.660547	0.494306
15310	0.841121	0.60815	0.503505	0.649307	0.478284
15320	0.830607	0.649948	0.491822	0.657175	0.490188
15330	0.825935	0.640543	0.518692	0.660922	0.495019
15340	0.814252	0.645768	0.478972	0.646309	0.473041
15350	0.836449	0.633229	0.504673	0.657175	0.489662
15360	0.797897	0.629049	0.504673	0.643312	0.46844
15370	0.814252	0.632184	0.46729	0.637692	0.460332
15380	0.824766	0.613375	0.501168	0.645185	0.472092
15390	0.834112	0.641588	0.523364	0.665418	0.50253
15400	0.83528	0.631139	0.48014	0.648183	0.47648
15410	0.823598	0.62278	0.511682	0.651555	0.481052
15420	0.821262	0.633229	0.507009	0.653054	0.483412
15430	0.824766	0.619645	0.504673	0.648558	0.476444
15440	0.82243	0.6186	0.502336	0.646684	0.473742
15450	0.818925	0.609195	0.478972	0.634695	0.45635
15460	0.839953	0.61024	0.469626	0.638816	0.462687
15470	0.818925	0.607106	0.508178	0.643312	0.468409
15480	0.836449	0.613375	0.5	0.648558	0.477023
15490	0.809579	0.624869	0.501168	0.644436	0.469527
15500	0.815421	0.613375	0.492991	0.639565	0.462622
15510	0.820093	0.624869	0.509346	0.650431	0.479398
15520	0.836449	0.637409	0.507009	0.659423	0.492911
15530	0.829439	0.600836	0.496495	0.640689	0.465219
15540	0.834112	0.645768	0.505841	0.661296	0.496312
15550	0.834112	0.640543	0.504673	0.659048	0.492945
15560	0.807243	0.628004	0.496495	0.643312	0.467334
15570	0.817757	0.619645	0.476636	0.637317	0.45952
15580	0.834112	0.617555	0.508178	0.65193	0.482275
15590	0.808411	0.62278	0.490654	0.63994	0.463289
15600	0.84229	0.611285	0.459112	0.636568	0.459985
15610	0.845794	0.61233	0.478972	0.644436	0.471802
15620	0.818925	0.619645	0.508178	0.647808	0.475648
15630	0.825935	0.619645	0.482477	0.641813	0.466773
15640	0.820093	0.645768	0.504673	0.656426	0.48854
15650	0.820093	0.61442	0.490654	0.640689	0.464085
15660	0.823598	0.62278	0.504673	0.649307	0.477636
15670	0.807243	0.61024	0.498832	0.637692	0.459801
15680	0.823598	0.624869	0.507009	0.650806	0.479082
15690	0.818925	0.642633	0.483645	0.648183	0.476026
15700	0.846963	0.605016	0.517523	0.654552	0.486408
15710	0.82243	0.605016	0.483645	0.635819	0.457672
15720	0.810748	0.61651	0.495327	0.63994	0.463687
15730	0.832944	0.637409	0.481308	0.650056	0.480306
15740	0.828271	0.60815	0.471963	0.635069	0.456801
15750	0.811916	0.617555	0.511682	0.645935	0.472504
15760	0.834112	0.623824	0.488318	0.647808	0.476409
15770	0.810748	0.621735	0.478972	0.636568	0.458457
15780	0.820093	0.642633	0.516355	0.659048	0.491927
15790	0.823598	0.617555	0.501168	0.646309	0.4727
15800	0.810748	0.634274	0.454439	0.633196	0.454489
15810	0.82243	0.606061	0.48014	0.635069	0.456929
15820	0.829439	0.619645	0.501168	0.648932	0.477502
15830	0.824766	0.630094	0.485981	0.646309	0.473426
15840	0.834112	0.61024	0.485981	0.642188	0.467906
15850	0.806075	0.630094	0.456776	0.630948	0.450153
15860	0.817757	0.646813	0.503505	0.655676	0.487447
15870	0.820093	0.621735	0.496495	0.645185	0.471729
15880	0.804907	0.652038	0.477804	0.645185	0.471825
15890	0.82243	0.609195	0.482477	0.636943	0.459168
15900	0.82243	0.635319	0.489486	0.648558	0.477417
15910	0.803738	0.617555	0.489486	0.636193	0.457276
15920	0.813084	0.6186	0.504673	0.644436	0.469888
15930	0.815421	0.634274	0.509346	0.652304	0.482429
15940	0.841121	0.613375	0.498832	0.649682	0.479113
15950	0.807243	0.639498	0.497664	0.647808	0.475825
15960	0.828271	0.641588	0.503505	0.657175	0.489615
15970	0.816589	0.6186	0.485981	0.639565	0.463367
15980	0.796729	0.609195	0.492991	0.632072	0.451499
15990	0.810748	0.646813	0.497664	0.651555	0.481109
16000	0.823598	0.602926	0.537383	0.652679	0.482304
16010	0.814252	0.624869	0.502336	0.646309	0.473758
16020	0.817757	0.631139	0.461449	0.636568	0.459485
16030	0.82243	0.6186	0.46729	0.635444	0.457225
16040	0.821262	0.623824	0.495327	0.645935	0.47279
16050	0.813084	0.633229	0.531542	0.658299	0.489643
16060	0.817757	0.623824	0.497664	0.64556	0.471626
16070	0.797897	0.601881	0.516355	0.637317	0.458857
16080	0.834112	0.625914	0.483645	0.647059	0.474132
16090	0.815421	0.624869	0.510514	0.649307	0.477352
16100	0.809579	0.62278	0.474299	0.635069	0.455711
16110	0.825935	0.615465	0.471963	0.636943	0.460062
16120	0.828271	0.601881	0.51285	0.645935	0.471804
16130	0.827103	0.624869	0.488318	0.645935	0.472548
16140	0.803738	0.628004	0.46729	0.632821	0.453049
16150	0.817757	0.626959	0.514019	0.65193	0.481876
16160	0.828271	0.623824	0.514019	0.654178	0.484763
16170	0.809579	0.632184	0.498832	0.646309	0.472806
16180	0.827103	0.639498	0.475467	0.647059	0.475315
16190	0.814252	0.629049	0.503505	0.648183	0.475926
16200	0.830607	0.621735	0.501168	0.650056	0.478882
16210	0.832944	0.61024	0.482477	0.640689	0.465459
16220	0.82243	0.634274	0.491822	0.648932	0.477058
16230	0.810748	0.606061	0.483645	0.632447	0.452692
16240	0.830607	0.61651	0.497664	0.647059	0.474543
16250	0.825935	0.617555	0.502336	0.647433	0.47551
16260	0.82243	0.606061	0.51986	0.647808	0.475817
16270	0.817757	0.611285	0.495327	0.640315	0.46484
16280	0.829439	0.628004	0.508178	0.654178	0.485596
16290	0.825935	0.61651	0.474299	0.638067	0.461296
16300	0.82243	0.619645	0.495327	0.644811	0.470849
16310	0.829439	0.62278	0.478972	0.642937	0.468943
16320	0.831776	0.6186	0.482477	0.643312	0.470115
16330	0.807243	0.628004	0.474299	0.636193	0.458003
16340	0.827103	0.628004	0.484813	0.645935	0.472431
16350	0.816589	0.631139	0.489486	0.645185	0.472151
16360	0.824766	0.609195	0.485981	0.638816	0.462437
16370	0.801402	0.606061	0.48715	0.630573	0.449324
16380	0.816589	0.62278	0.471963	0.636568	0.458638
16390	0.825935	0.62069	0.496495	0.646684	0.473936
16400	0.825935	0.621735	0.497664	0.647433	0.475692
16410	0.824766	0.626959	0.514019	0.654178	0.484129
16420	0.814252	0.61233	0.494159	0.639191	0.462452
16430	0.814252	0.615465	0.508178	0.644811	0.470218
16440	0.820093	0.632184	0.502336	0.650806	0.480236
16450	0.809579	0.636364	0.504673	0.649682	0.476976
16460	0.825935	0.595611	0.51285	0.642937	0.467668
16470	0.82243	0.628004	0.488318	0.64556	0.471953
16480	0.824766	0.624869	0.51285	0.653054	0.483764
16490	0.830607	0.62069	0.464953	0.638067	0.461737
16500	0.838785	0.635319	0.484813	0.652304	0.48294
16510	0.808411	0.636364	0.504673	0.649307	0.476508
16520	0.813084	0.626959	0.483645	0.640689	0.464807
16530	0.818925	0.630094	0.476636	0.641439	0.465838
16540	0.832944	0.635319	0.498832	0.654927	0.486152
16550	0.814252	0.629049	0.5	0.647059	0.473961
16560	0.823598	0.619645	0.492991	0.644436	0.470171
16570	0.831776	0.62069	0.476636	0.642188	0.467733
16580	0.811916	0.61233	0.490654	0.637317	0.459498
16590	0.82243	0.621735	0.492991	0.644811	0.471291
16600	0.84229	0.599791	0.46729	0.635069	0.457398
16610	0.820093	0.615465	0.489486	0.640689	0.464587
16620	0.825935	0.624869	0.473131	0.640689	0.465326
16630	0.804907	0.615465	0.483645	0.633945	0.453579
16640	0.799065	0.61442	0.505841	0.638816	0.46123
16650	0.830607	0.628004	0.46729	0.641439	0.467277
16660	0.811916	0.632184	0.46028	0.634695	0.45546
16670	0.827103	0.615465	0.501168	0.646684	0.473912
16680	0.827103	0.6186	0.498832	0.647059	0.47463
16690	0.811916	0.619645	0.497664	0.642188	0.466777
16700	0.841121	0.598746	0.48014	0.638441	0.462549
16710	0.827103	0.61024	0.504673	0.645935	0.472918
16720	0.829439	0.61442	0.484813	0.641813	0.466719
16730	0.82243	0.61651	0.485981	0.640689	0.464827
16740	0.820093	0.632184	0.501168	0.650431	0.479111
16750	0.829439	0.617555	0.503505	0.648932	0.477581
16760	0.804907	0.603971	0.48715	0.630948	0.449492
16770	0.818925	0.599791	0.482477	0.632447	0.452382
16780	0.828271	0.642633	0.478972	0.649682	0.479021
16790	0.814252	0.61233	0.483645	0.635819	0.458002
16800	0.80257	0.621735	0.464953	0.629449	0.44716
16810	0.821262	0.642633	0.504673	0.655676	0.487517
16820	0.813084	0.6186	0.494159	0.641064	0.464621
16830	0.838785	0.617555	0.491822	0.648183	0.476649
16840	0.803738	0.625914	0.503505	0.643687	0.468412
16850	0.832944	0.640543	0.484813	0.652304	0.483411
16860	0.823598	0.639498	0.497664	0.653054	0.483484
16870	0.809579	0.60815	0.501168	0.638441	0.460006
16880	0.836449	0.61024	0.483645	0.642188	0.467296
16890	0.839953	0.628004	0.510514	0.658299	0.491723
16900	0.837617	0.61651	0.483645	0.644811	0.472637
16910	0.820093	0.633229	0.483645	0.645185	0.47144
16920	0.818925	0.617555	0.503505	0.64556	0.472035
16930	0.817757	0.642633	0.510514	0.656426	0.488471
16940	0.829439	0.621735	0.494159	0.647433	0.475288
16950	0.829439	0.634274	0.481308	0.647808	0.476236
16960	0.839953	0.629049	0.491822	0.652679	0.483666
16970	0.803738	0.626959	0.505841	0.644811	0.470596
16980	0.814252	0.602926	0.502336	0.638441	0.461214
16990	0.828271	0.62069	0.485981	0.644061	0.470496
17000	0.808411	0.602926	0.492991	0.633571	0.453634
17010	0.844626	0.62278	0.463785	0.642937	0.469126
17020	0.80257	0.62069	0.488318	0.636568	0.457976
17030	0.797897	0.633229	0.507009	0.64556	0.471241
17040	0.824766	0.61442	0.5	0.645185	0.471051
17050	0.824766	0.640543	0.478972	0.647808	0.475808
17060	0.838785	0.62069	0.488318	0.648183	0.477884
17070	0.845794	0.61442	0.530374	0.661671	0.49703
17080	0.807243	0.606061	0.484813	0.631697	0.451449
17090	0.809579	0.62069	0.504673	0.644061	0.469644
17100	0.83528	0.642633	0.495327	0.657175	0.490162
17110	0.815421	0.624869	0.498832	0.64556	0.471712
17120	0.825935	0.630094	0.459112	0.638067	0.461657
17130	0.804907	0.621735	0.496495	0.640315	0.463854
17140	0.825935	0.634274	0.476636	0.645185	0.473206
17150	0.837617	0.613375	0.5	0.648932	0.477502
17160	0.793224	0.615465	0.488318	0.631697	0.450561
17170	0.810748	0.611285	0.488318	0.635819	0.457238
17180	0.818925	0.625914	0.497664	0.646684	0.472673
17190	0.834112	0.61651	0.5	0.648932	0.476749
17200	0.820093	0.628004	0.478972	0.641813	0.466911
17210	0.813084	0.639498	0.509346	0.653428	0.482838
17220	0.82243	0.60815	0.497664	0.641439	0.464868
17230	0.814252	0.602926	0.483645	0.632447	0.452295
17240	0.823598	0.611285	0.496495	0.642563	0.467796
17250	0.836449	0.635319	0.496495	0.655302	0.487676
17260	0.797897	0.630094	0.477804	0.635069	0.456496
17270	0.830607	0.634274	0.505841	0.656051	0.488493
17280	0.814252	0.645768	0.488318	0.649307	0.478029
17290	0.808411	0.643678	0.482477	0.644811	0.470938
17300	0.821262	0.62069	0.481308	0.640315	0.464206
17310	0.820093	0.617555	0.478972	0.638067	0.461376
17320	0.806075	0.634274	0.462617	0.63432	0.456298
17330	0.803738	0.623824	0.482477	0.636193	0.45789
17340	0.810748	0.637409	0.470794	0.639565	0.463744
17350	0.827103	0.61651	0.477804	0.639565	0.463759
17360	0.838785	0.61651	0.503505	0.651555	0.481191
17370	0.829439	0.615465	0.469626	0.637317	0.460035
17380	0.827103	0.628004	0.497664	0.650056	0.479012
17390	0.838785	0.629049	0.489486	0.651555	0.481825
17400	0.816589	0.626959	0.48715	0.642937	0.468964
17410	0.830607	0.607106	0.481308	0.638441	0.46233
17420	0.823598	0.613375	0.497664	0.643687	0.46941
17430	0.83528	0.617555	0.488318	0.645935	0.473117
17440	0.818925	0.634274	0.491822	0.647808	0.475979
17450	0.813084	0.634274	0.473131	0.63994	0.4632
17460	0.806075	0.602926	0.459112	0.621956	0.436336
17470	0.836449	0.643678	0.473131	0.650806	0.481357
17480	0.814252	0.609195	0.478972	0.633196	0.45361
17490	0.811916	0.634274	0.490654	0.645185	0.471495
17500	0.823598	0.62278	0.498832	0.647433	0.474436
17510	0.80257	0.644723	0.474299	0.640689	0.464575
17520	0.811916	0.603971	0.496495	0.636193	0.457035
17530	0.823598	0.626959	0.466121	0.638441	0.462204
17540	0.807243	0.590387	0.455607	0.61671	0.429513
17550	0.814252	0.624869	0.474299	0.637317	0.459941
17560	0.803738	0.633229	0.489486	0.641813	0.466117
17570	0.831776	0.626959	0.471963	0.642937	0.469353
17580	0.831776	0.61651	0.471963	0.639191	0.463583
17590	0.836449	0.61233	0.483645	0.642937	0.469134
17600	0.829439	0.634274	0.496495	0.652679	0.483855
17610	0.821262	0.649948	0.474299	0.648558	0.477851
17620	0.815421	0.599791	0.492991	0.634695	0.455258
17630	0.804907	0.61442	0.481308	0.632821	0.453423
17640	0.821262	0.589342	0.485981	0.630573	0.449758
17650	0.832944	0.617555	0.495327	0.647433	0.474906
17660	0.836449	0.617555	0.515187	0.654927	0.485814
17670	0.828271	0.639498	0.48715	0.65118	0.480888
17680	0.831776	0.628004	0.505841	0.654178	0.48463
17690	0.845794	0.633229	0.470794	0.649307	0.478512
17700	0.825935	0.60815	0.476636	0.635819	0.45807
17710	0.825935	0.624869	0.51285	0.653428	0.483754
17720	0.806075	0.615465	0.485981	0.635069	0.45664
17730	0.82243	0.611285	0.497664	0.642563	0.467794
17740	0.827103	0.61233	0.481308	0.639191	0.463233
17750	0.84229	0.638454	0.462617	0.647433	0.477038
17760	0.799065	0.61651	0.475467	0.629824	0.448292
17770	0.792056	0.624869	0.468458	0.628325	0.446428
17780	0.811916	0.61651	0.504673	0.643312	0.468465
17790	0.825935	0.658307	0.48715	0.657175	0.490486
17800	0.820093	0.631139	0.494159	0.647808	0.475783
17810	0.815421	0.615465	0.501168	0.642937	0.467711
17820	0.815421	0.62069	0.498832	0.644061	0.468781
17830	0.836449	0.634274	0.478972	0.649307	0.478405
17840	0.800234	0.624869	0.492991	0.638816	0.461313
17850	0.797897	0.603971	0.488318	0.629075	0.446707
17860	0.825935	0.617555	0.470794	0.637317	0.459936
17870	0.839953	0.624869	0.48014	0.647433	0.475665
17880	0.836449	0.613375	0.482477	0.642937	0.469232
17890	0.820093	0.641588	0.441589	0.634695	0.457399
17900	0.825935	0.624869	0.503505	0.650431	0.47928
17910	0.827103	0.625914	0.473131	0.641439	0.466702
17920	0.811916	0.636364	0.488318	0.645185	0.471397
17930	0.817757	0.639498	0.491822	0.649307	0.477919
17940	0.816589	0.631139	0.497664	0.647808	0.476185
17950	0.810748	0.61024	0.483645	0.633945	0.454555
17960	0.810748	0.629049	0.48014	0.639565	0.462438
17970	0.827103	0.635319	0.495327	0.65193	0.482566
17980	0.795561	0.6186	0.490654	0.63432	0.454636
17990	0.820093	0.637409	0.454439	0.637317	0.460414
18000	0.824766	0.621735	0.481308	0.641813	0.466885
18010	0.806075	0.624869	0.515187	0.647808	0.474385
18020	0.815421	0.61024	0.484813	0.635819	0.457483
18030	0.821262	0.6186	0.501168	0.645935	0.472648
18040	0.80257	0.631139	0.476636	0.636568	0.458616
18050	0.82243	0.609195	0.448598	0.626077	0.443976
18060	0.829439	0.601881	0.438084	0.62233	0.438703
18070	0.80257	0.632184	0.485981	0.63994	0.46346
18080	0.829439	0.637409	0.478972	0.648183	0.476593
18090	0.804907	0.61024	0.463785	0.625703	0.442171
18100	0.821262	0.613375	0.482477	0.638067	0.461592
18110	0.821262	0.598746	0.473131	0.629824	0.44831
18120	0.815421	0.617555	0.48014	0.636943	0.458815
18130	0.811916	0.630094	0.485981	0.642188	0.466774
18140	0.827103	0.62278	0.482477	0.643312	0.469663
18150	0.814252	0.6186	0.503505	0.644436	0.470149
18160	0.82243	0.628004	0.468458	0.639191	0.463148
18170	0.811916	0.602926	0.495327	0.635444	0.456985
18180	0.810748	0.621735	0.491822	0.640689	0.464729
18190	0.821262	0.62069	0.464953	0.635069	0.45672
18200	0.817757	0.635319	0.495327	0.648932	0.477857
18210	0.817757	0.609195	0.473131	0.632447	0.453028
18220	0.803738	0.621735	0.454439	0.626452	0.443366
18230	0.804907	0.625914	0.485981	0.638441	0.460484
18240	0.82243	0.603971	0.492991	0.638441	0.461452
18250	0.82243	0.639498	0.488318	0.649682	0.478146
18260	0.814252	0.628004	0.473131	0.638067	0.460586
18270	0.814252	0.621735	0.475467	0.636568	0.458571
18280	0.804907	0.640543	0.46028	0.635444	0.457566
18290	0.832944	0.634274	0.48014	0.648558	0.476597
18300	0.796729	0.624869	0.459112	0.626827	0.443542
18310	0.814252	0.61442	0.495327	0.640315	0.464006
18320	0.830607	0.626959	0.48014	0.645185	0.472432
18330	0.811916	0.626959	0.470794	0.636193	0.458141
18340	0.82243	0.611285	0.470794	0.633945	0.454916
18350	0.810748	0.637409	0.482477	0.643312	0.469421
18360	0.818925	0.605016	0.488318	0.636193	0.457947
18370	0.832944	0.596656	0.477804	0.63432	0.455676
18380	0.809579	0.60815	0.5	0.638067	0.460558
18390	0.804907	0.601881	0.491822	0.631697	0.450083
18400	0.803738	0.630094	0.494159	0.642188	0.467006
18410	0.827103	0.626959	0.492991	0.648183	0.47631
18420	0.837617	0.619645	0.503505	0.652304	0.482838
18430	0.817757	0.633229	0.476636	0.642188	0.46765
18440	0.793224	0.633229	0.469626	0.632072	0.45196
18450	0.830607	0.6186	0.457944	0.635069	0.457424
18460	0.830607	0.621735	0.484813	0.644811	0.471775
18470	0.810748	0.623824	0.478972	0.637317	0.459541
18480	0.809579	0.623824	0.462617	0.631697	0.451445
18490	0.817757	0.609195	0.485981	0.636568	0.458881
18500	0.830607	0.644723	0.463785	0.646309	0.474296
18510	0.820093	0.633229	0.494159	0.648558	0.476591
18520	0.801402	0.643678	0.485981	0.643687	0.46933
18530	0.809579	0.628004	0.478972	0.638441	0.461048
18540	0.836449	0.6186	0.484813	0.64556	0.472261
18550	0.810748	0.615465	0.485981	0.636568	0.458438
18560	0.821262	0.629049	0.491822	0.646684	0.474065
18570	0.810748	0.61442	0.484813	0.635819	0.456954
18580	0.787383	0.635319	0.482477	0.635069	0.455693
18590	0.820093	0.61442	0.494159	0.641813	0.466917
18600	0.814252	0.619645	0.469626	0.633945	0.45469
18610	0.844626	0.603971	0.477804	0.640689	0.465904
18620	0.829439	0.629049	0.48014	0.64556	0.472758
18630	0.816589	0.642633	0.468458	0.642563	0.467915
18640	0.809579	0.624869	0.48014	0.637692	0.460652
18650	0.804907	0.621735	0.469626	0.631697	0.450747
18660	0.804907	0.641588	0.490654	0.64556	0.472433
18670	0.814252	0.629049	0.48014	0.640689	0.464915
18680	0.814252	0.60815	0.490654	0.636568	0.459253
18690	0.807243	0.634274	0.468458	0.636568	0.458767
18700	0.823598	0.621735	0.478972	0.640689	0.464801
18710	0.823598	0.626959	0.468458	0.639191	0.463198
18720	0.795561	0.61442	0.445093	0.618209	0.430406
18730	0.817757	0.625914	0.477804	0.63994	0.463459
18740	0.820093	0.628004	0.489486	0.645185	0.471954
18750	0.814252	0.628004	0.475467	0.638816	0.461882
18760	0.834112	0.629049	0.46729	0.642937	0.470053
18770	0.808411	0.623824	0.482477	0.637692	0.459821
18780	0.820093	0.619645	0.466121	0.634695	0.456589
18790	0.810748	0.613375	0.494159	0.638441	0.461172
18800	0.816589	0.6186	0.478972	0.637317	0.460082
18810	0.809579	0.621735	0.495327	0.641439	0.465017
18820	0.814252	0.626959	0.478972	0.639565	0.463006
18830	0.808411	0.623824	0.505841	0.645185	0.471854
18840	0.814252	0.623824	0.494159	0.643312	0.468092
18850	0.82243	0.606061	0.489486	0.638067	0.460678
18860	0.83528	0.645768	0.464953	0.648558	0.478785
18870	0.82243	0.621735	0.462617	0.635069	0.456554
18880	0.813084	0.602926	0.483645	0.632072	0.451602
18890	0.811916	0.636364	0.483645	0.643687	0.46948
18900	0.795561	0.653083	0.501168	0.650056	0.478724
18910	0.809579	0.635319	0.505841	0.649682	0.477859
18920	0.80257	0.621735	0.476636	0.633196	0.453248
18930	0.824766	0.630094	0.443925	0.632821	0.454759
18940	0.788551	0.615465	0.466121	0.62308	0.437972
18950	0.824766	0.597701	0.462617	0.627201	0.445584
18960	0.806075	0.61233	0.469626	0.6287	0.446601
18970	0.816589	0.632184	0.482477	0.643312	0.468821
18980	0.820093	0.61024	0.471963	0.633196	0.453965
18990	0.834112	0.61651	0.514019	0.653428	0.48367
19000	0.807243	0.6186	0.469626	0.631323	0.45016
19010	0.810748	0.605016	0.494159	0.635444	0.456394
19020	0.828271	0.638454	0.5	0.654927	0.486274
19030	0.824766	0.634274	0.470794	0.642937	0.469396
19040	0.816589	0.621735	0.464953	0.633945	0.455114
19050	0.821262	0.615465	0.471963	0.635444	0.457584
19060	0.821262	0.62069	0.478972	0.639565	0.46339
19070	0.824766	0.617555	0.482477	0.640689	0.465572
19080	0.804907	0.607106	0.491822	0.633571	0.454003
19090	0.811916	0.609195	0.483645	0.633945	0.4546
19100	0.823598	0.633229	0.457944	0.638067	0.46215
19110	0.810748	0.630094	0.478972	0.639565	0.463113
19120	0.80257	0.6186	0.464953	0.628325	0.446292
19130	0.810748	0.60815	0.470794	0.629075	0.447028
19140	0.810748	0.6186	0.496495	0.641064	0.464839
19150	0.816589	0.617555	0.494159	0.641813	0.466326
19160	0.813084	0.62278	0.474299	0.636193	0.458406
19170	0.827103	0.611285	0.470794	0.635444	0.457682
19180	0.80257	0.617555	0.48014	0.632821	0.452647
19190	0.818925	0.637409	0.481308	0.64556	0.471467
19200	0.820093	0.6186	0.484813	0.640315	0.465013
19210	0.817757	0.621735	0.483645	0.640315	0.464793
19220	0.808411	0.6186	0.485981	0.636943	0.458853
19230	0.839953	0.61442	0.496495	0.648932	0.477499
19240	0.815421	0.617555	0.491822	0.640689	0.465028
19250	0.809579	0.632184	0.463785	0.635069	0.456449
19260	0.785047	0.635319	0.453271	0.624953	0.441945
19270	0.80257	0.623824	0.46028	0.6287	0.446856
19280	0.809579	0.6186	0.490654	0.638816	0.461238
19290	0.808411	0.635319	0.483645	0.642188	0.467714
19300	0.830607	0.645768	0.459112	0.645185	0.47333
19310	0.815421	0.62069	0.471963	0.635444	0.456848
19320	0.809579	0.636364	0.5	0.648183	0.476239
19330	0.80257	0.626959	0.490654	0.639565	0.463022
19340	0.820093	0.639498	0.474299	0.644436	0.470996
19350	0.807243	0.633229	0.481308	0.640315	0.463859
19360	0.800234	0.613375	0.484813	0.632072	0.451291
19370	0.818925	0.6186	0.469626	0.635069	0.457282
19380	0.804907	0.613375	0.443925	0.620457	0.435303
19390	0.807243	0.605016	0.489486	0.632821	0.452438
19400	0.814252	0.630094	0.477804	0.640315	0.464436
19410	0.804907	0.630094	0.475467	0.636568	0.458616
19420	0.829439	0.611285	0.489486	0.642188	0.467912
19430	0.823598	0.650993	0.5	0.657924	0.490499
19440	0.799065	0.634274	0.459112	0.630948	0.450146
19450	0.83528	0.597701	0.496495	0.641439	0.466683
19460	0.808411	0.61233	0.462617	0.627201	0.444849
19470	0.808411	0.625914	0.464953	0.632821	0.45341
19480	0.823598	0.625914	0.475467	0.641064	0.466519
19490	0.810748	0.62278	0.455607	0.629449	0.449325
19500	0.82243	0.625914	0.490654	0.64556	0.472049
19510	0.790888	0.632184	0.483645	0.635444	0.455678
19520	0.824766	0.631139	0.5	0.65118	0.480428
19530	0.803738	0.628004	0.484813	0.638441	0.461582
19540	0.816589	0.62278	0.469626	0.635819	0.458453
19550	0.815421	0.628004	0.474299	0.638816	0.462468
19560	0.818925	0.621735	0.490654	0.642937	0.468291
19570	0.818925	0.634274	0.483645	0.645185	0.472173
19580	0.823598	0.644723	0.466121	0.644811	0.472271
19590	0.792056	0.61024	0.482477	0.627576	0.444071
19600	0.82243	0.641588	0.494159	0.652304	0.482029
19610	0.82243	0.633229	0.488318	0.647433	0.475717
19620	0.814252	0.613375	0.481308	0.635444	0.457816
19630	0.809579	0.634274	0.481308	0.641439	0.465632
19640	0.813084	0.62069	0.476636	0.636193	0.457585
19650	0.813084	0.625914	0.481308	0.639565	0.462709
19660	0.814252	0.611285	0.488318	0.636943	0.458646
19670	0.794393	0.60815	0.46729	0.622705	0.437355
19680	0.82243	0.6186	0.478972	0.639191	0.462846
19690	0.804907	0.613375	0.457944	0.624953	0.441614
19700	0.816589	0.650993	0.503505	0.6568	0.48827
19710	0.823598	0.626959	0.474299	0.641064	0.466569
19720	0.808411	0.631139	0.464953	0.634695	0.456482
19730	0.810748	0.603971	0.482477	0.631323	0.451425
19740	0.771028	0.617555	0.505841	0.630948	0.448259
19750	0.807243	0.61233	0.483645	0.633571	0.454093
19760	0.803738	0.634274	0.497664	0.644811	0.470375
19770	0.793224	0.615465	0.453271	0.620457	0.434495
19780	0.827103	0.619645	0.473131	0.639191	0.463339
19790	0.801402	0.62278	0.484813	0.635819	0.45687
19800	0.810748	0.61651	0.456776	0.627576	0.445921
19810	0.78972	0.633229	0.456776	0.626827	0.444131
19820	0.814252	0.61651	0.494159	0.640689	0.464885
19830	0.811916	0.61024	0.471963	0.630573	0.44878
19840	0.795561	0.606061	0.478972	0.626077	0.441768
19850	0.776869	0.613375	0.495327	0.627951	0.444372
19860	0.816589	0.61024	0.446262	0.623829	0.440358
19870	0.814252	0.629049	0.469626	0.637317	0.460197
19880	0.809579	0.619645	0.46028	0.629449	0.448511
19890	0.813084	0.636364	0.502336	0.650056	0.478782
19900	0.825935	0.611285	0.498832	0.644061	0.470102
19910	0.813084	0.631139	0.482477	0.641813	0.466384
19920	0.801402	0.645768	0.46729	0.638441	0.460889
19930	0.809579	0.615465	0.477804	0.633571	0.454198
19940	0.796729	0.62069	0.491822	0.635819	0.45665
19950	0.820093	0.613375	0.505841	0.645185	0.47107
19960	0.809579	0.61024	0.476636	0.631323	0.450356
19970	0.817757	0.629049	0.498832	0.647808	0.47552
19980	0.808411	0.599791	0.489486	0.631323	0.449923
19990	0.816589	0.637409	0.48715	0.646684	0.474051
[truncated: 1,128 more rows]
